# Supplementary material
Source: publisher site journal article supplement (https://www.dovepress.com/article/201324)
Supplement: Supplementary file 1 [file get_supplementary_file.php]

**Table S2. Quality assessment of included studies.**

| First author         | Q1 | Q2 | Q3 | Q4 | Q5 | Q6 | Q7 | End Point of 8 |
|----------------------|----|----|----|----|----|----|----|----------------|
| Adhiratha            | 1  | 1  | 0  | 1  | 1  | 0  | 1  | 5              |
| Alali2008            | 1  | 1  | 1  | 2  | 1  | 1  | 1  | 8              |
| AlexandraMoura       | 1  | 1  | 1  | 2  | 1  | 0  | 1  | 7              |
| Ali Kazemnia         | 0  | 1  | 0  | 1  | 1  | 1  | 1  | 5              |
| Azucena Mora         | 1  | 1  | 1  | 1  | 0  | 1  | 1  | 6              |
| Baoguang             | 1  | 1  | 1  | 1  | 1  | 0  | 1  | 6              |
| Bhoomika             | 0  | 1  | 1  | 0  | 1  | 0  | 1  | 4              |
| Bogaard2001          | 1  | 1  | 1  | 1  | 1  | 0  | 1  | 6              |
| Hanna E. Sidjabat    | 0  | 1  | 1  | 1  | 1  | 0  | 1  | 5              |
| Iuliana E. Maciuca   | 0  | 1  | 1  | 1  | 1  | 1  | 1  | 6              |
| James                | 1  | 1  | 1  | 2  | 1  | 1  | 1  | 8              |
| Jing Wang            | 1  | 1  | 1  | 1  | 0  | 1  | 1  | 6              |
| Joanne L. Platell    | 0  | 1  | 1  | 0  | 0  | 0  | 1  | 3              |
| Jorge Hernandez      | 0  | 1  | 0  | 1  | 1  | 1  | 1  | 5              |
| Karen Alroy          | 0  | 0  | 1  | 0  | 1  | 0  | 1  | 3              |
| Katherine A. Stenske | 1  | 1  | 1  | 2  | 1  | 1  | 1  | 8              |
| Krushna Chandra      | 1  | 1  | 1  | 1  | 1  | 0  | 1  | 6              |
| L. Wang              | 1  | 1  | 1  | 1  | 0  | 1  | 1  | 6              |
| Manju Raj Purohit    | 1  | 1  | 1  | 1  | 1  | 1  | 1  | 7              |
| Mark R. Sannes       | 1  | 1  | 1  | 2  | 1  | 1  | 1  | 8              |
| Miles2006            | 1  | 1  | 1  | 1  | 0  | 1  | 1  | 6              |
| Miles2006            | 1  | 1  | 1  | 1  | 0  | 1  | 1  | 6              |
| Montserrat Sabate    | 1  | 1  | 1  | 1  | 1  | 0  | 1  | 6              |
| Pankaj Dhaka         | 1  | 1  | 1  | 1  | 0  | 1  | 1  | 6              |
| Adhiratha**          | 1  | 1  | 0  | 1  | 1  | 0  | 1  | 5              |
| Adhiratha Boonyasiri | 1  | 1  | 0  | 1  | 1  | 0  | 1  | 5              |
| TATSUYA              | 1  | 1  | 1  | 1  | 0  | 0  | 1  | 5              |
| Pasquali2015*        | 1  | 1  | 1  | 1  | 0  | 0  | 1  | 5              |
| ROSS                 | 0  | 1  | 1  | 1  | 0  | 1  | 1  | 5              |

|                  |   |   |   |   |   |   |   |   |
|------------------|---|---|---|---|---|---|---|---|
| Ryszard Koczura  | 1 | 1 | 1 | 2 | 1 | 1 | 1 | 8 |
| Sayah2005        | 1 | 1 | 0 | 1 | 1 | 0 | 1 | 5 |
| SCOTT            | 1 | 1 | 1 | 2 | 0 | 1 | 1 | 7 |
| Thomas*          | 1 | 0 | 0 | 1 | 0 | 0 | 1 | 3 |
| Thorsteinsdottir | 0 | 1 | 1 | 1 | 0 | 1 | 1 | 5 |
| VIKTORIA*        | 0 | 1 | 1 | 1 | 0 | 0 | 1 | 4 |
| WINOKUR          | 0 | 1 | 1 | 1 | 1 | 0 | 1 | 5 |
| Yolanda***       | 0 | 1 | 1 | 0 | 1 | 0 | 1 | 4 |
| Young            | 0 | 1 | 1 | 1 | 1 | 1 | 1 | 6 |

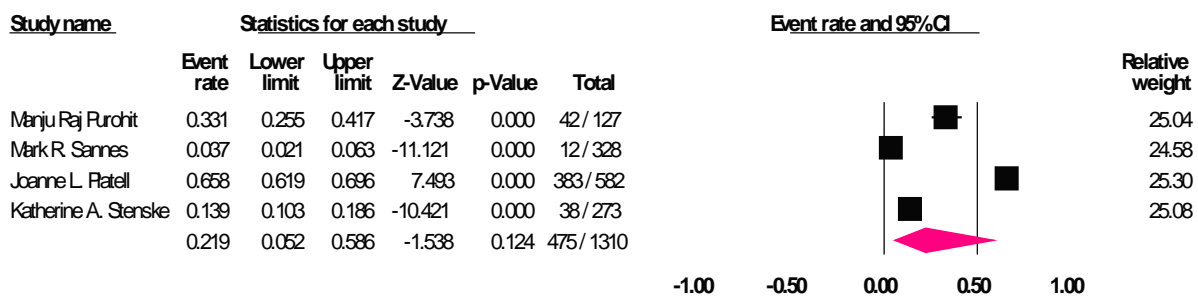

| <b>Model</b> | <b>Effect size and 95% interval</b> |                       |                    |                    | <b>Test of null (2-Tail)</b> |                | <b>Heterogeneity</b> |               |                |                  |
|--------------|-------------------------------------|-----------------------|--------------------|--------------------|------------------------------|----------------|----------------------|---------------|----------------|------------------|
| <b>Model</b> | <b>Number Studies</b>               | <b>Point estimate</b> | <b>Lower limit</b> | <b>Upper limit</b> | <b>Z-value</b>               | <b>P-value</b> | <b>Q-value</b>       | <b>df (Q)</b> | <b>P-value</b> | <b>I-squared</b> |
| Fixed        | 4                                   | 0.461                 | 0.427              | 0.496              | -2.208                       | 0.027          | 297.505              | 3             | 0.000          | 98.992           |
| Random       | 4                                   | 0.219                 | 0.052              | 0.586              | -1.538                       | 0.124          |                      |               |                |                  |

Fig S1. Prevalence of clinical (human) MDR *E.coli* isolates with Disk Diffusion method.

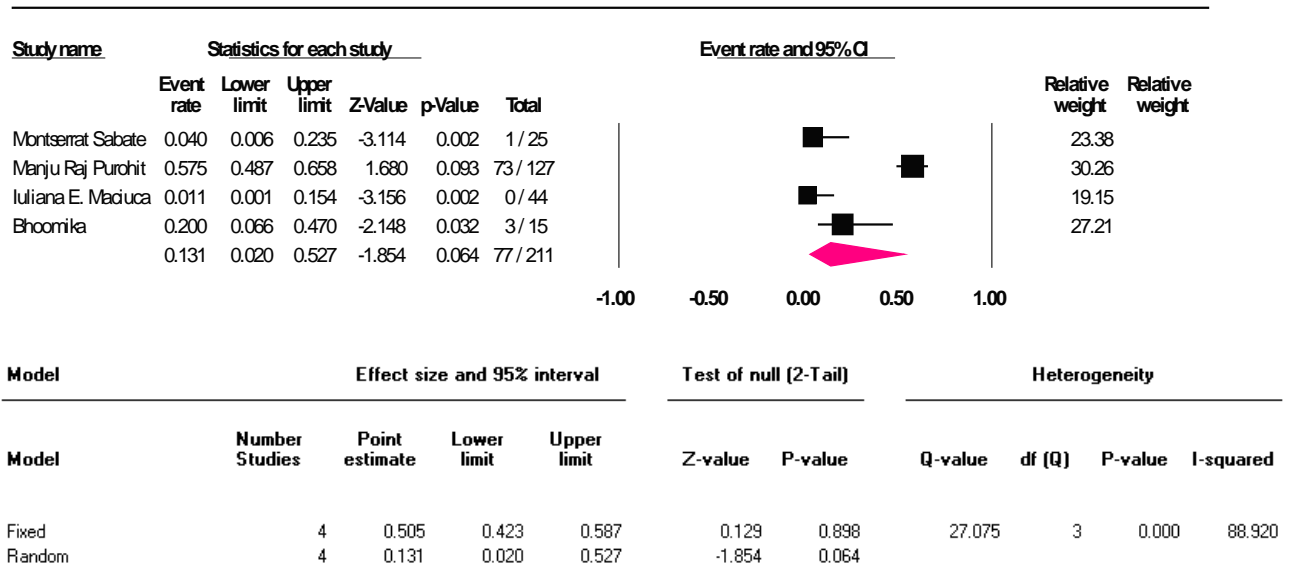

Fig S2. Prevalence of clinical (human) ESBL *E.coli* isolates with Disk Diffusion method

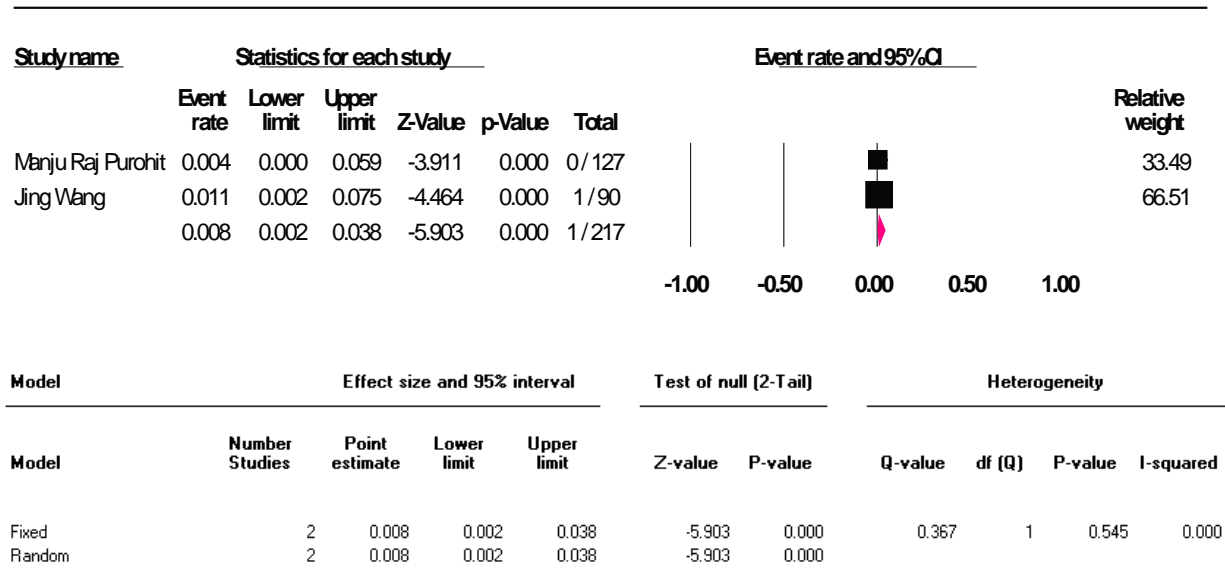

Fig S3. Prevalence of Colistin resistance *E.coli* clinical (human) isolates with Disk Diffusion method.

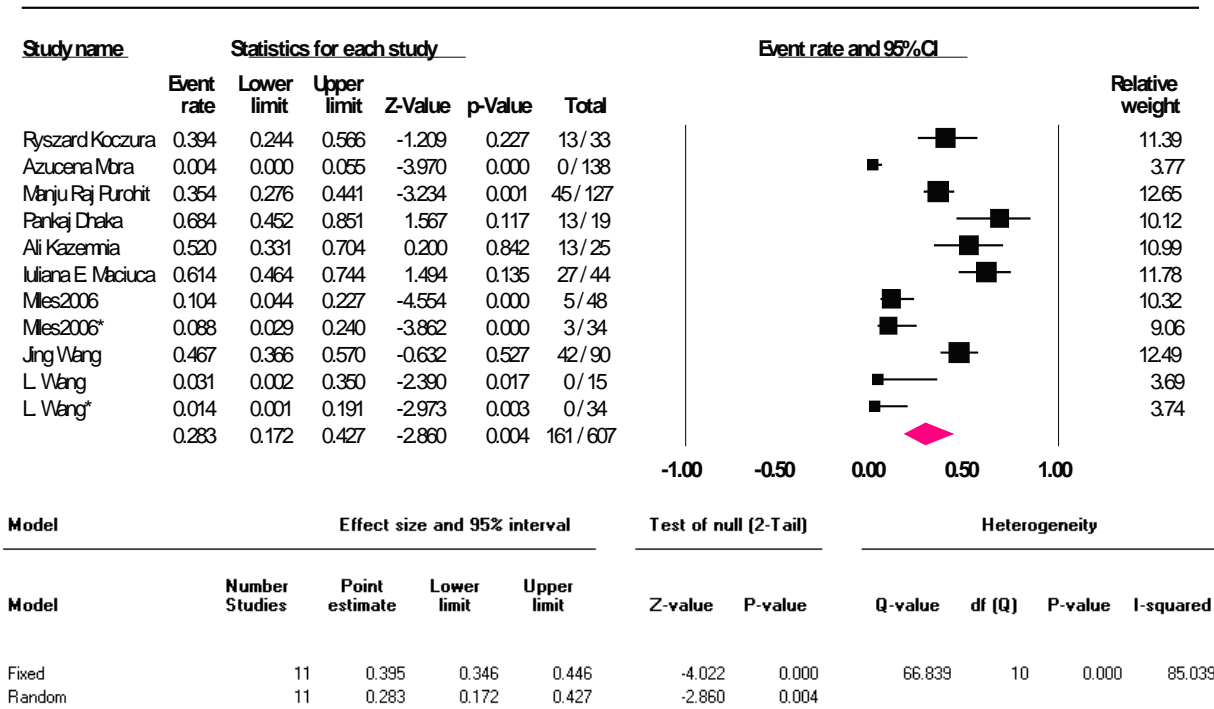

Fig S4. Prevalence of Ciprofloxacin resistance *E.coli* clinical (human) isolates with Disk Diffusion method.

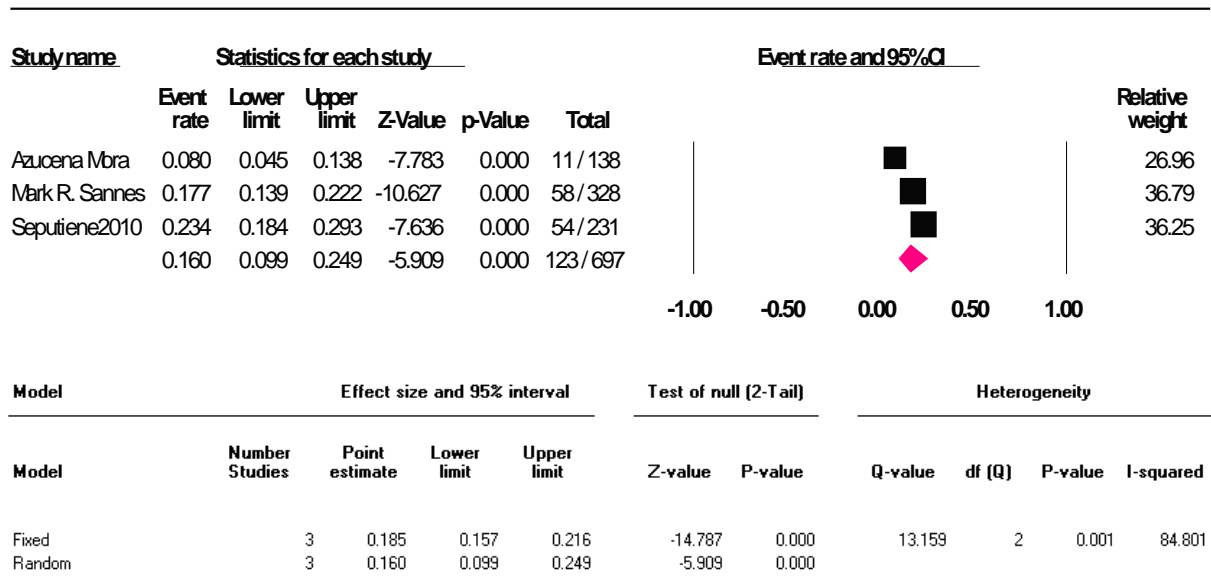

Fig S5. Prevalence of trimethoprim resistance *E.coli* clinical (human) isolates with Disk Diffusion method.

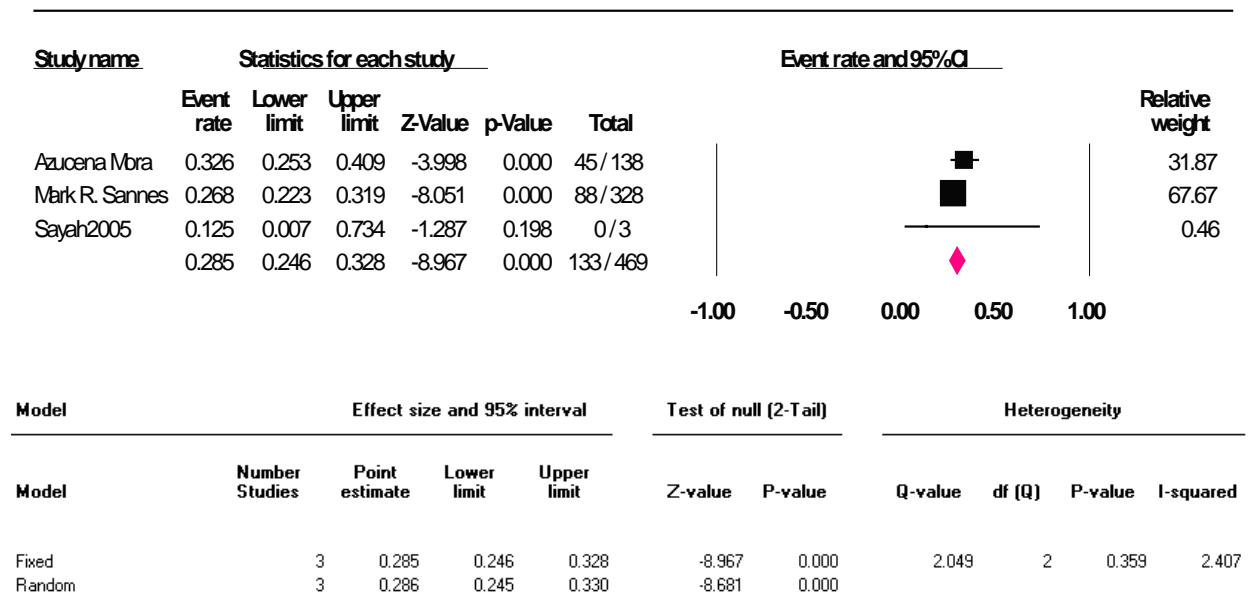

Fig S6. Prevalence of Sulfoxazole resistance E.coli clinical (human) isolates with Disk Diffusion method.



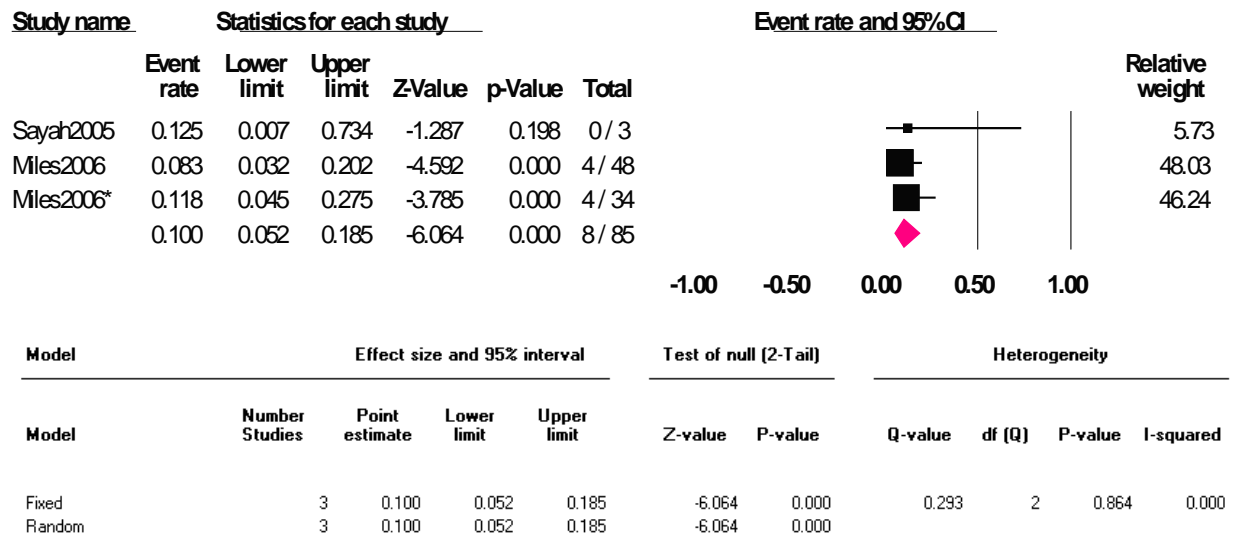

Fig S7. Prevalence of Ofloxacin resistance E.coli clinical (human) isolates with Disk Diffusion method.

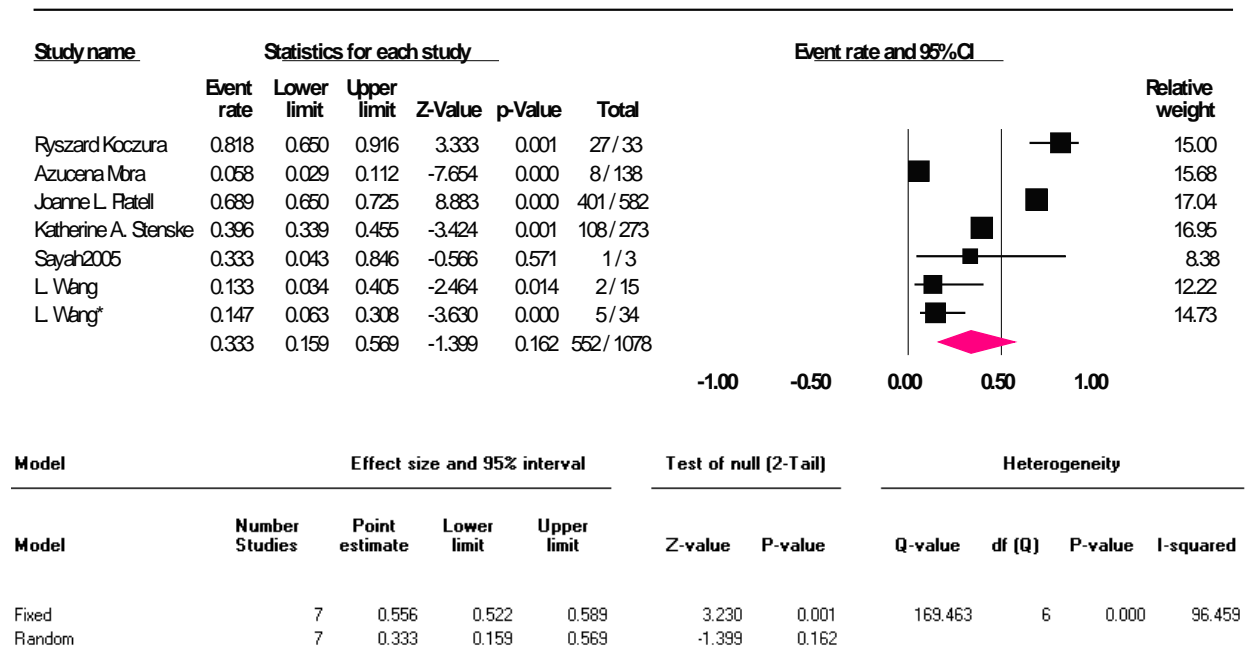

Fig S8. Prevalence of Cephalothin resistance E.coli clinical (human) isolates with Disk Diffusion method.

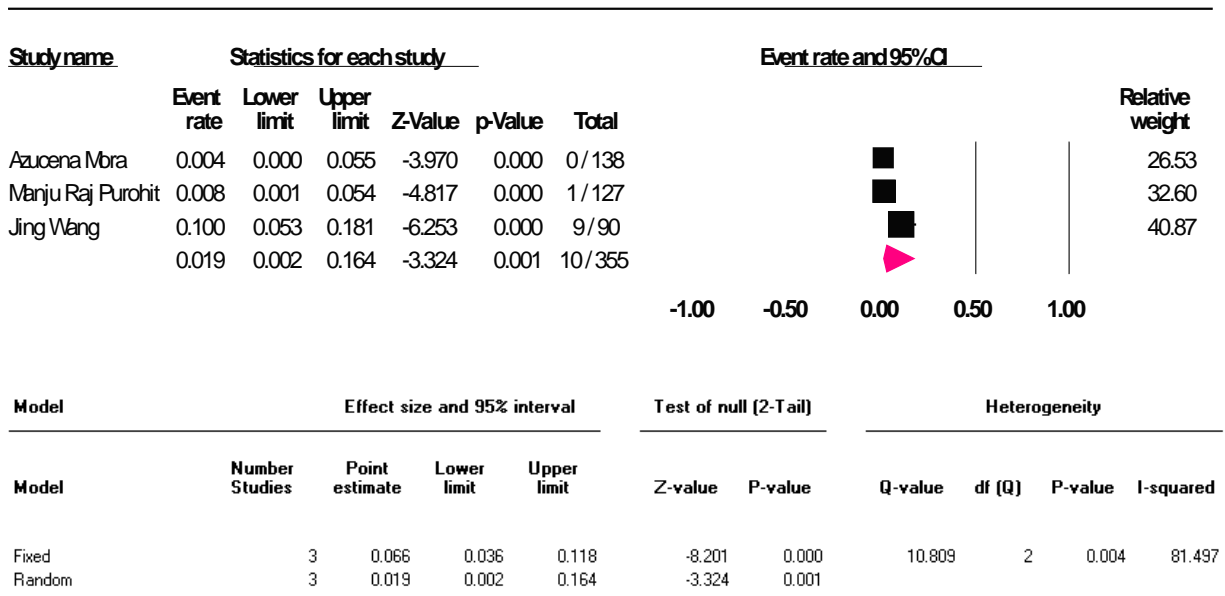

Fig S9. Prevalence of Amikacin resistance E.coli clinical (human) isolates with Disk Diffusion method.

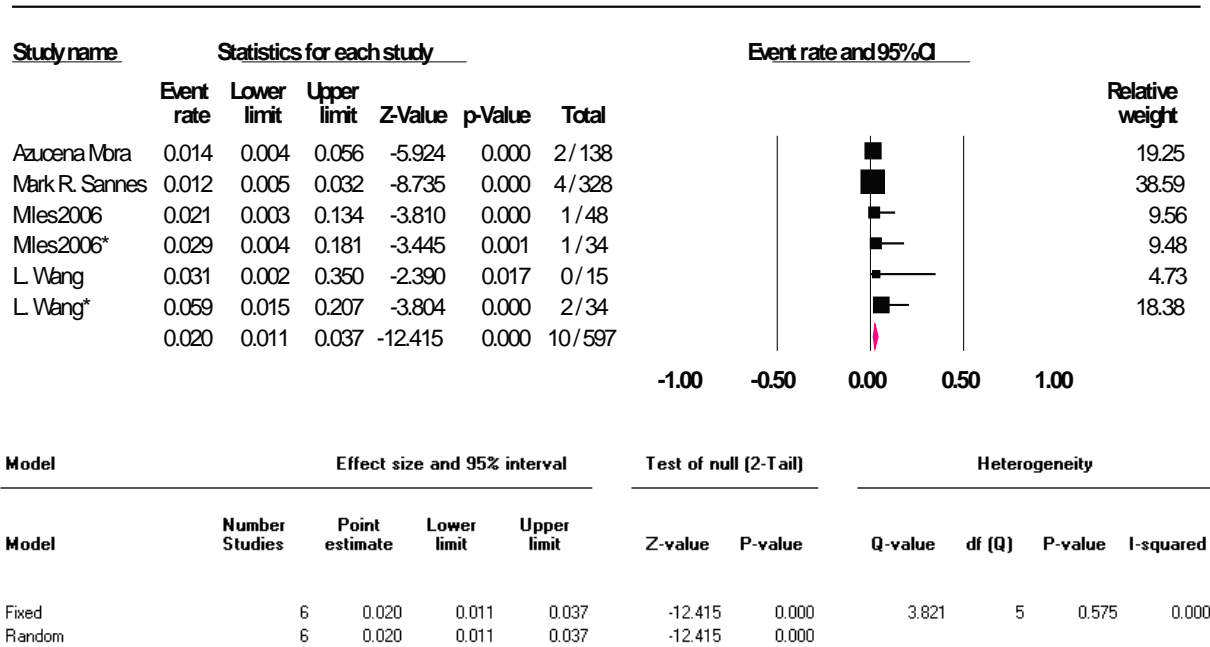

Fig S10. Prevalence of Amoxicillin/clavulanic acid resistance E.coli clinical (human) isolates with Disk Diffusion method.

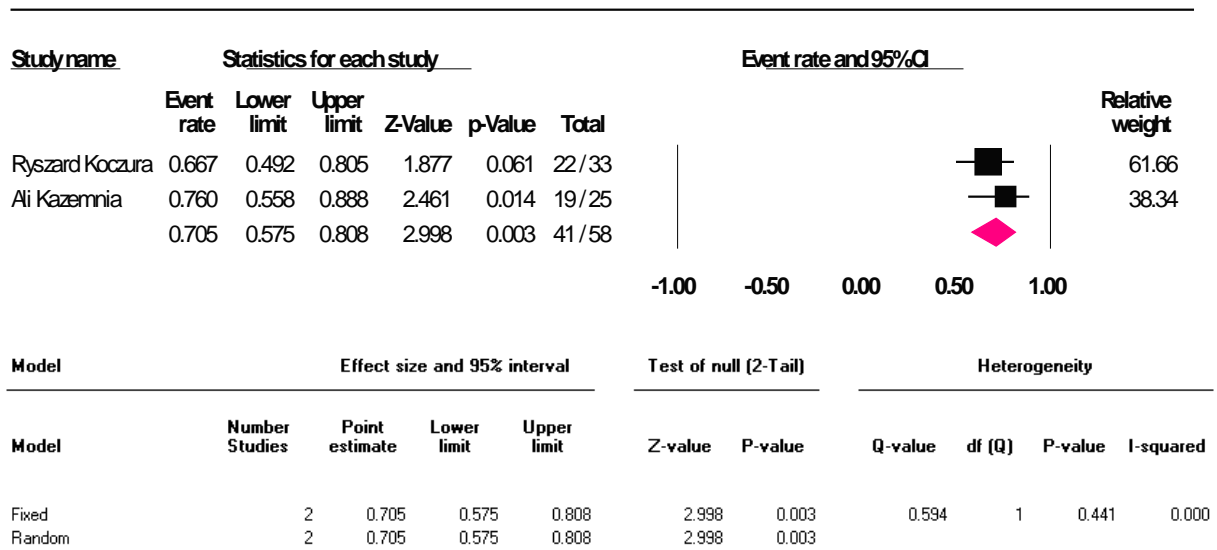

Fig S511. Prevalence of amoxicillin resistance E.coli clinical (human) isolates with Disk Diffusion method.

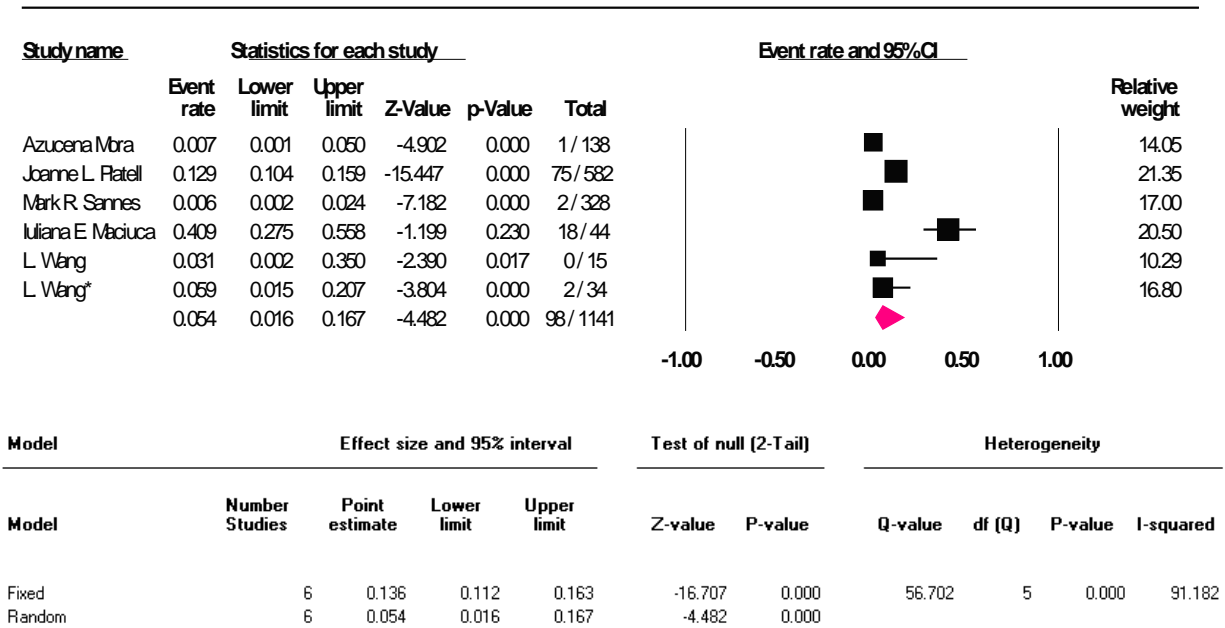

Fig S12. Prevalence of Cefoxitin resistance E.coli clinical (human) isolates with Disk Diffusion method.

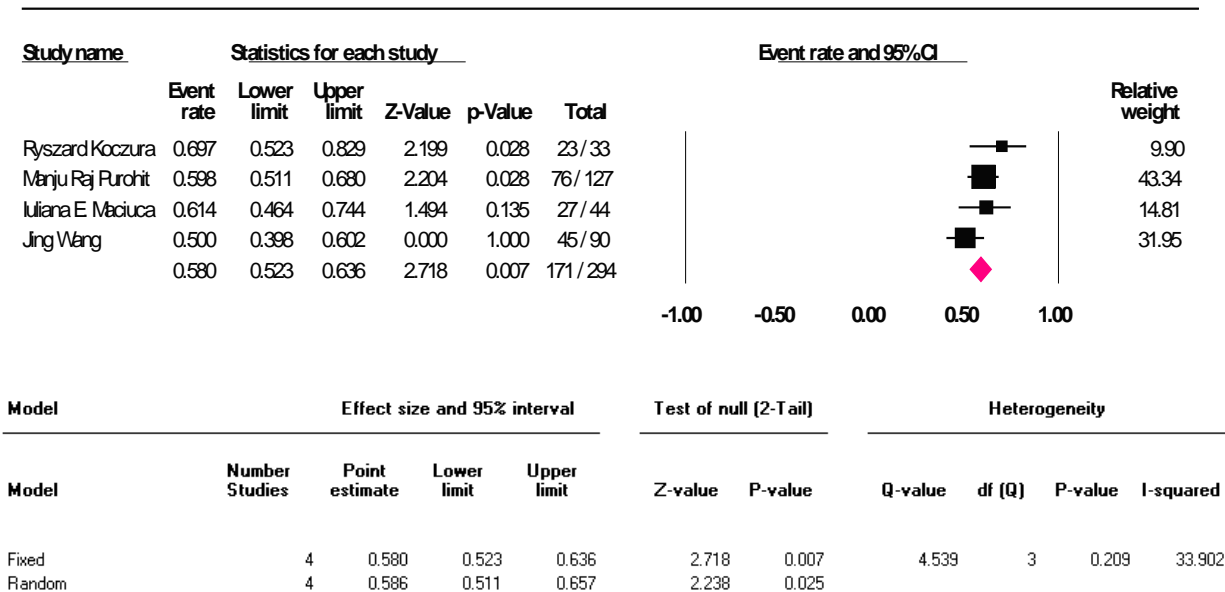

Fig S13. Prevalence of Cefotaxim resistance E.coli clinical (human) isolates with Disk Diffusion method.

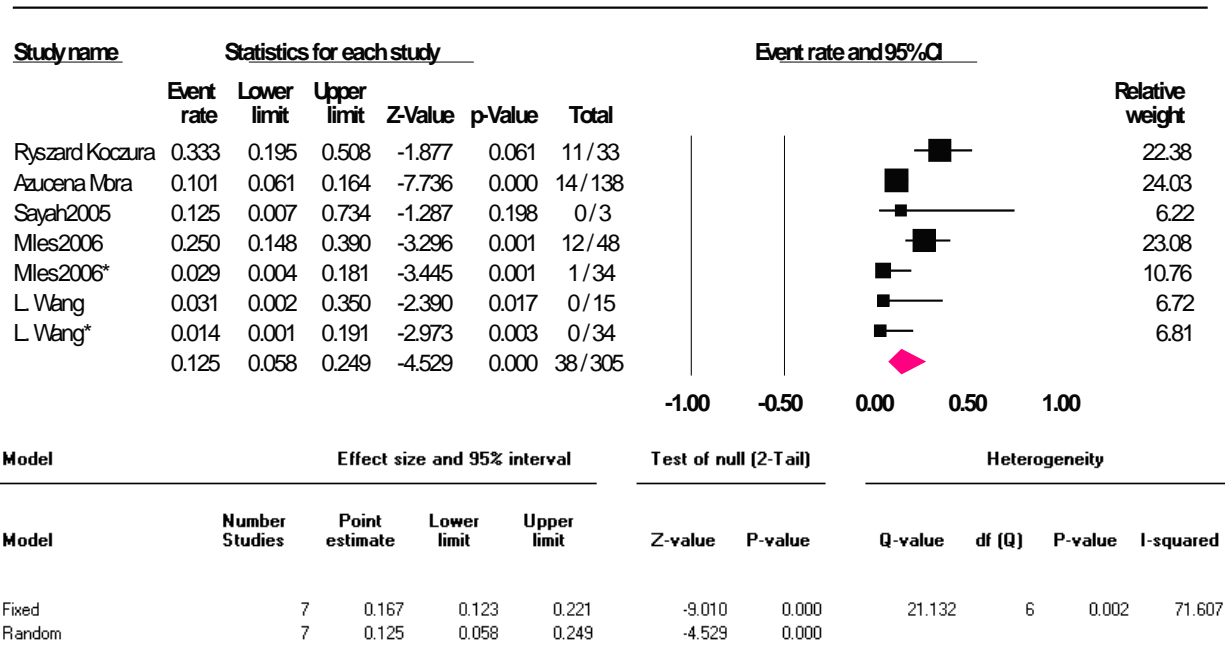

Fig S14. Prevalence of Chloramphenicol resistance E.coli clinical (human) isolates with Disk Diffusion method.



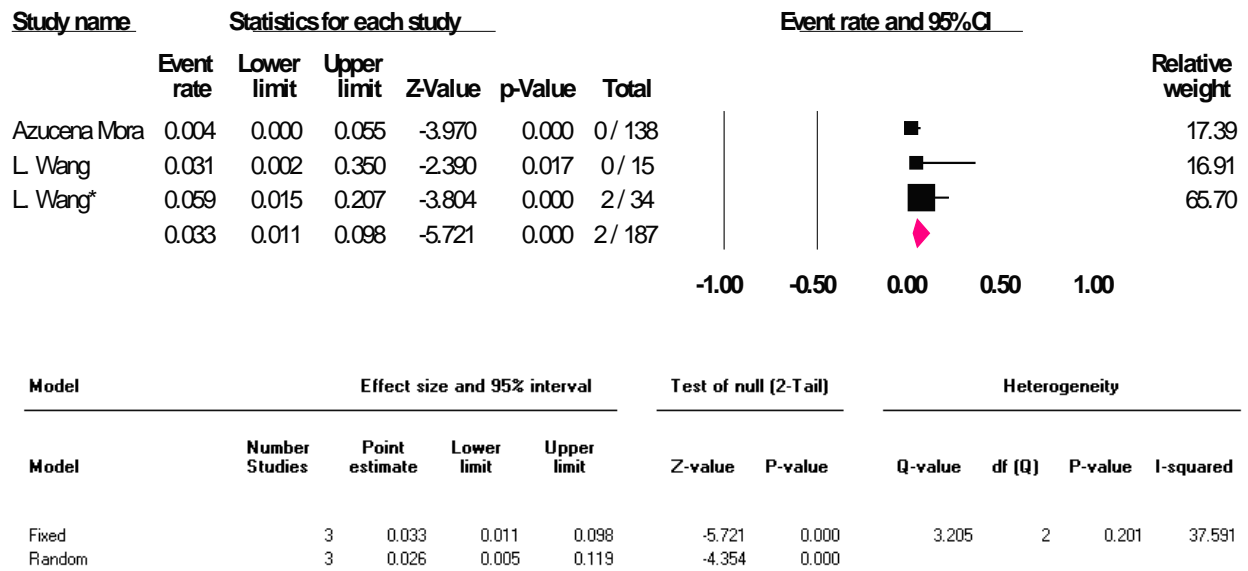

Fig S15. Prevalence of Ceftriaxone resistance E.coli clinical (human) isolates with Disk Diffusion method.

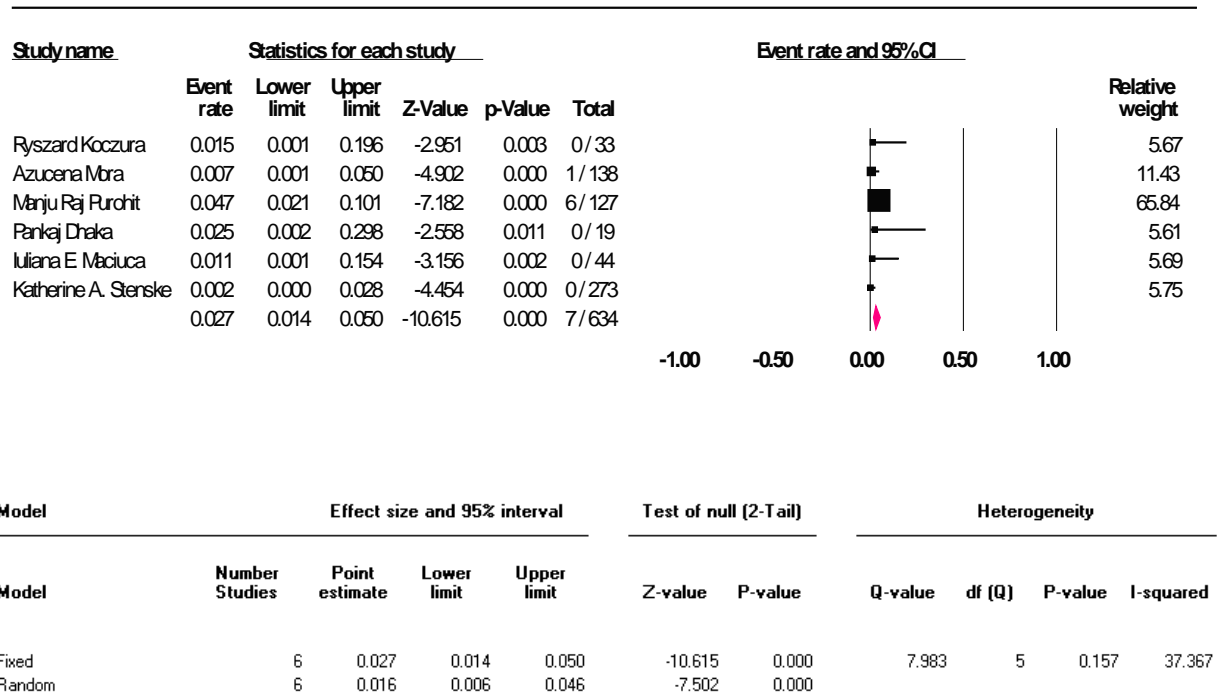

Fig S16. Prevalence of Imipenem resistance E.coli clinical (human) isolates with Disk Diffusion method.

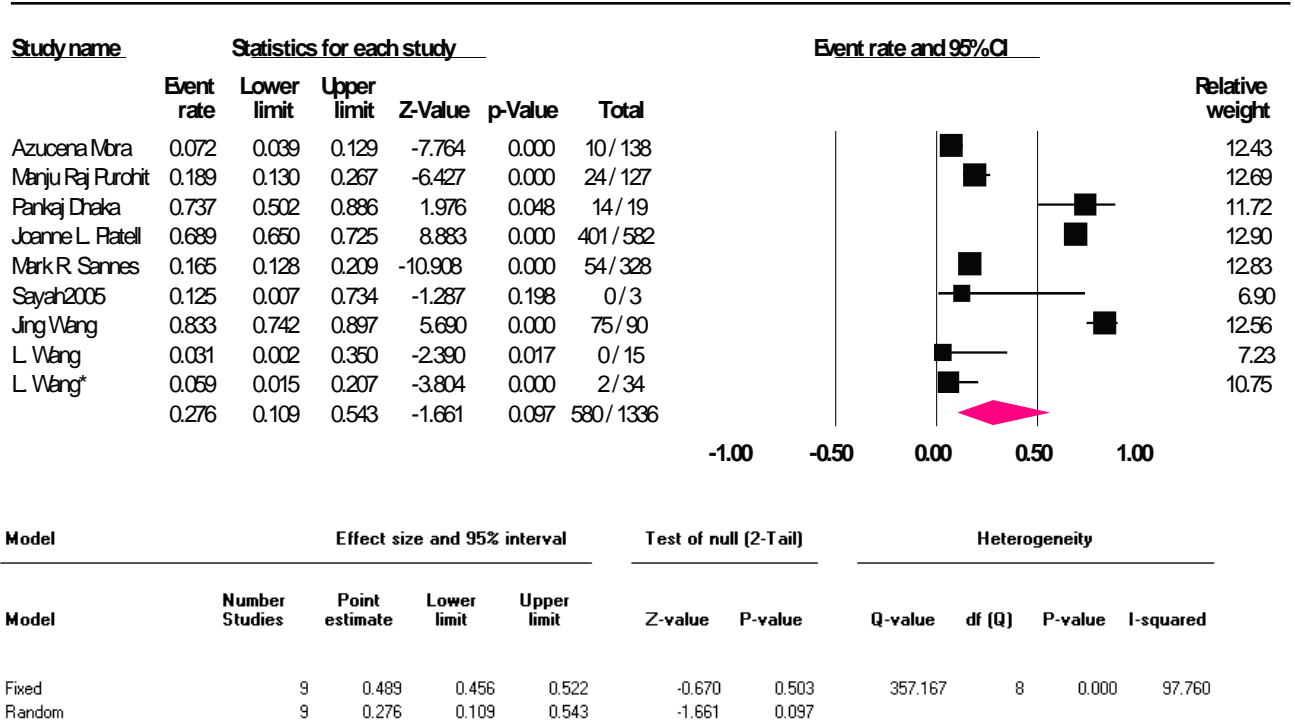

Fig S17. Prevalence of Trimethoprim/sulfamethoxazole resistance E.coli clinical (human) isolates with Disk Diffusion method.

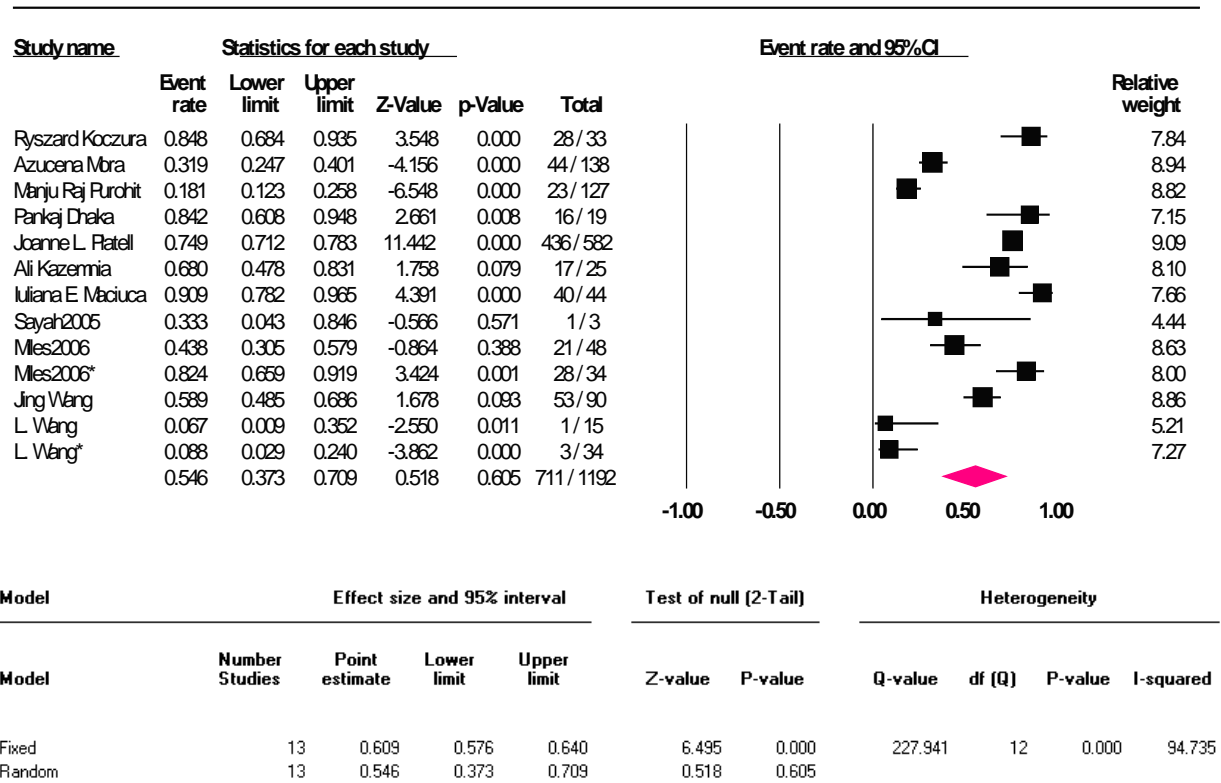

Fig S18. Prevalence of Tetracycline resistance E.coli clinical (human) isolates with Disk Diffusion method.

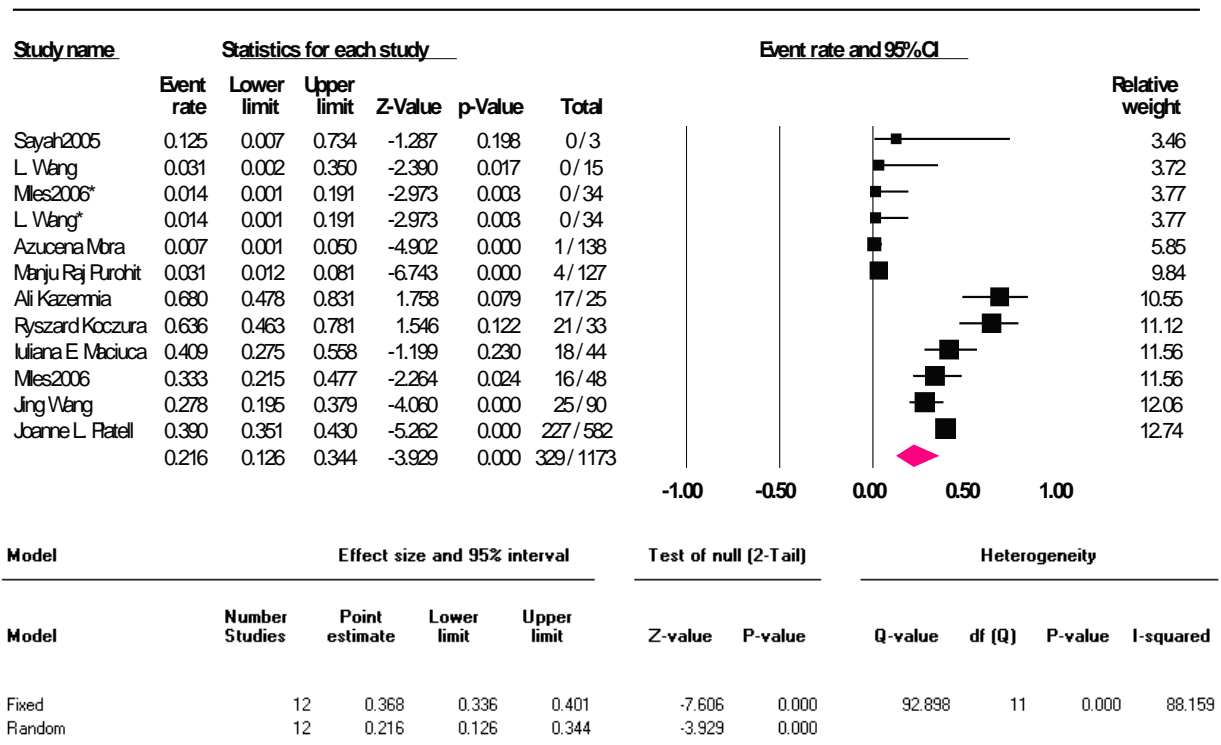

Fig S19. Prevalence of Gentamicin resistance E.coli clinical (human) isolates with Disk Diffusion method.

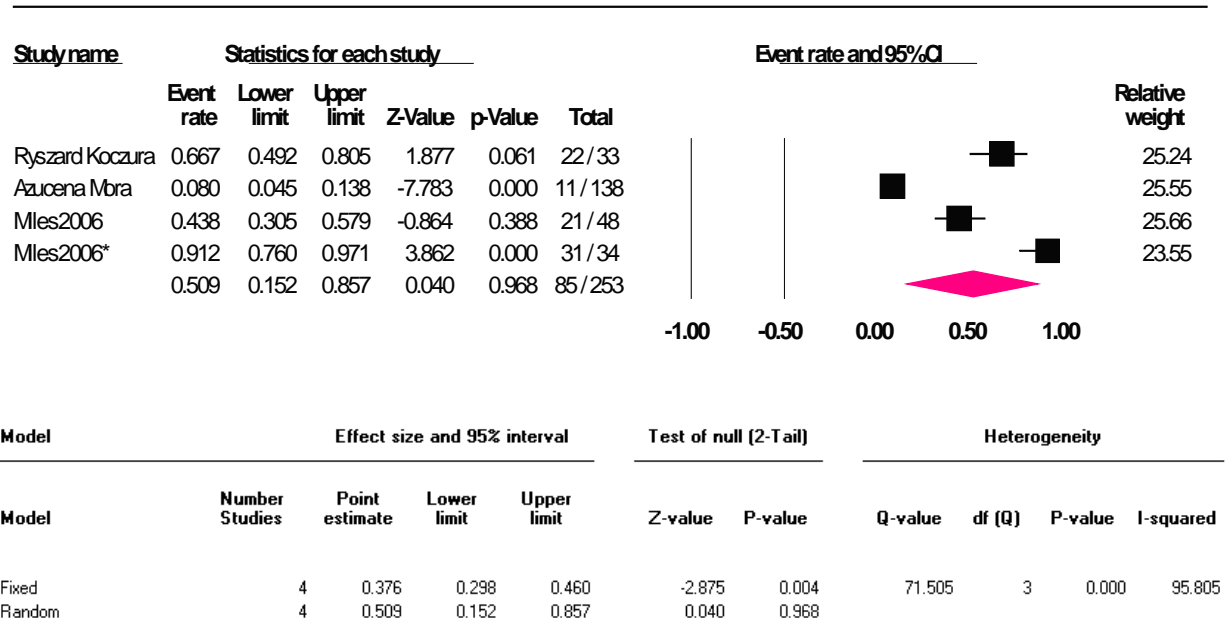

Fig S20. Prevalence of kanamycin resistance E.coli clinical (human) isolates with Disk Diffusion method.

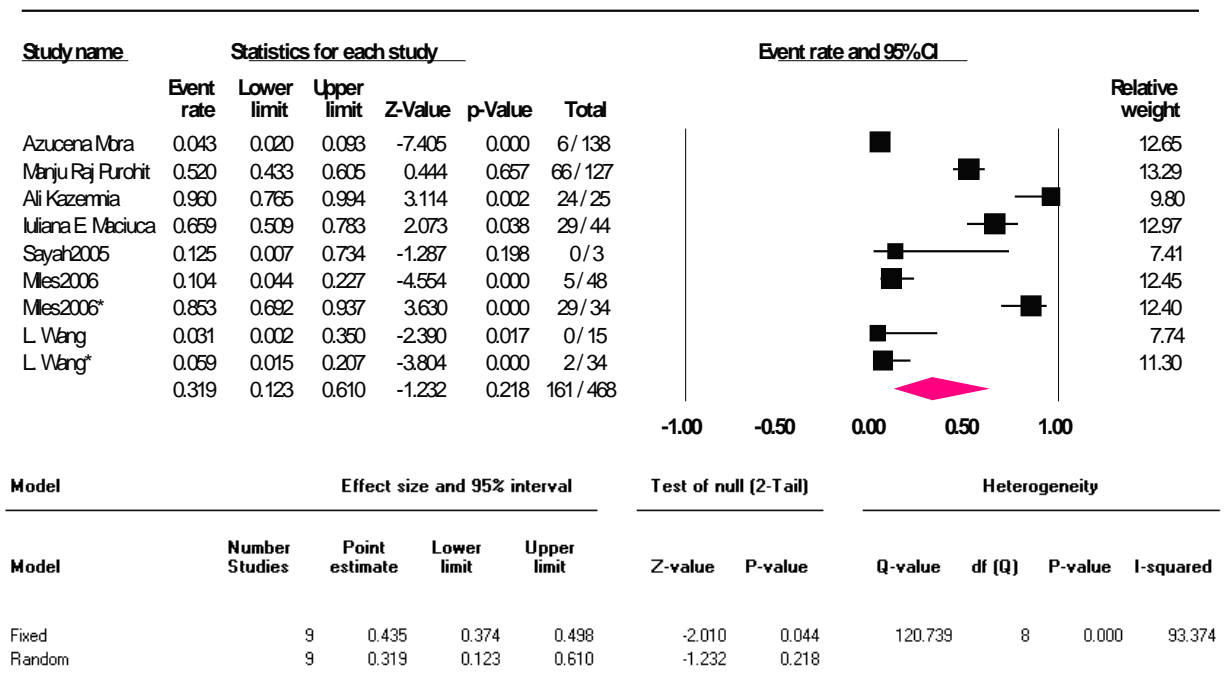

Fig S21. Prevalence of Nalidixic acid resistance E.coli clinical (human) isolates with Disk Diffusion method.

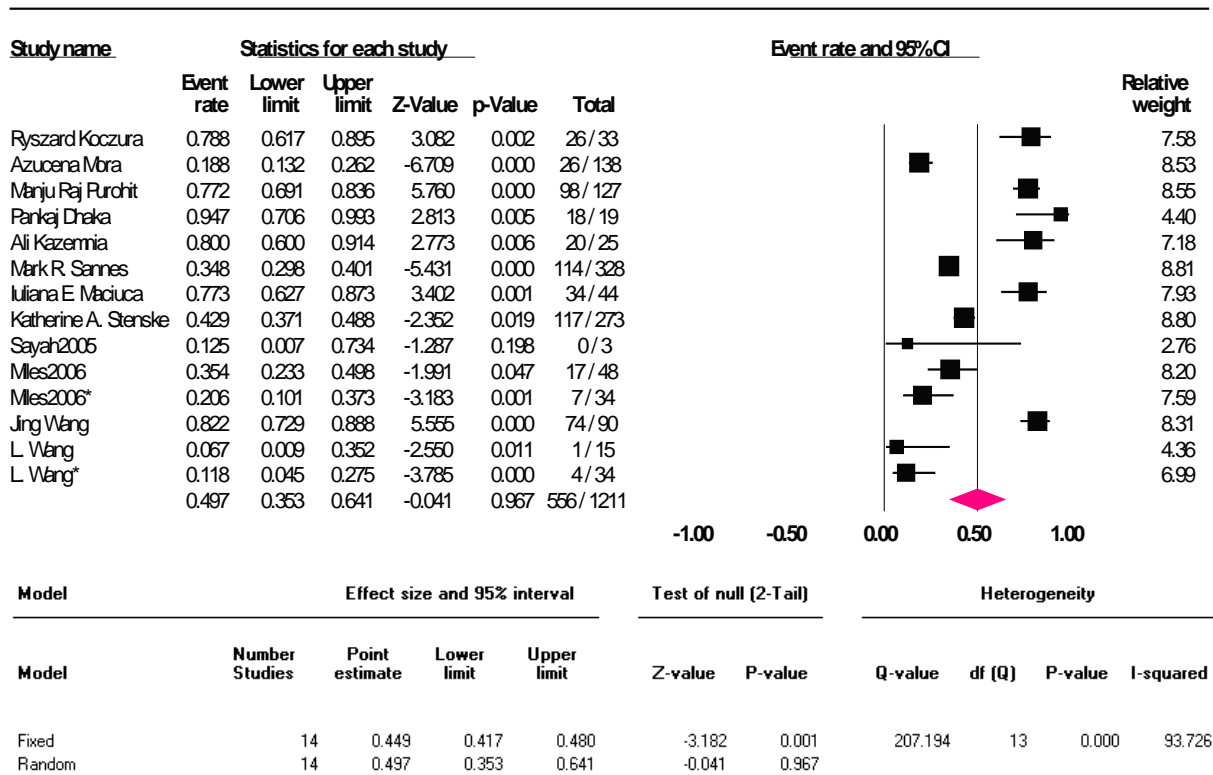

Fig S22. Prevalence of Ampicillin resistance E.coli clinical (human) isolates with Disk Diffusion method.



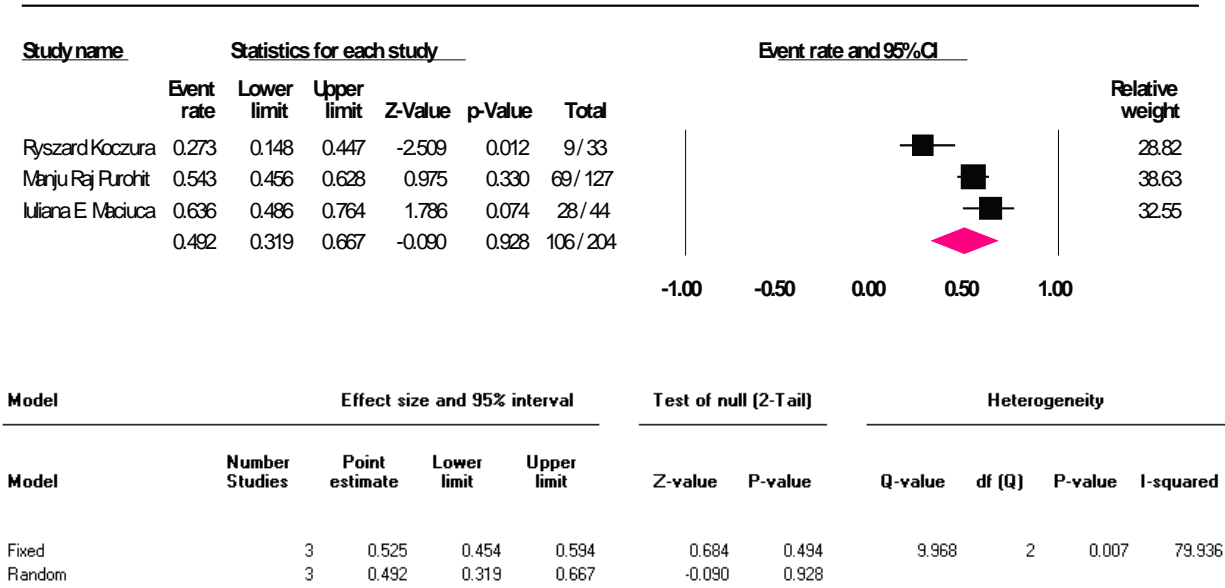

Fig S23. Prevalence of Ceftazidim resistance E.coli clinical (human) isolates with Disk Diffusion method.

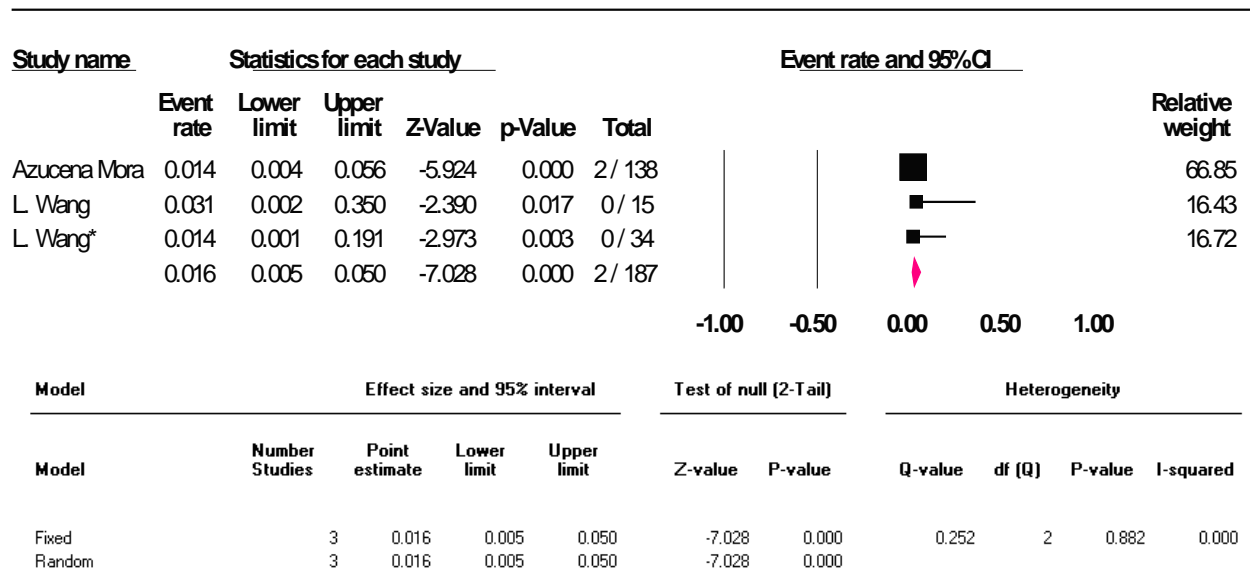

Fig S24. Prevalence of Aztreonam resistance E.coli clinical (human) isolates with Disk Diffusion method.

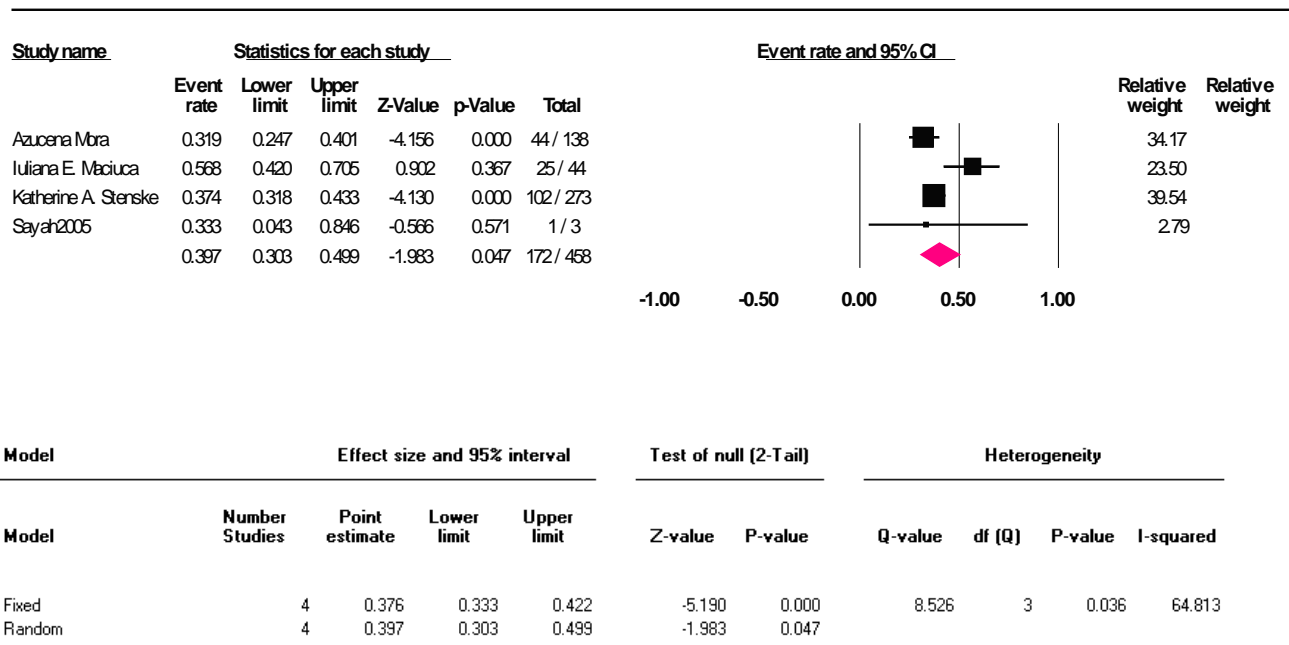

Fig S25. Prevalence of streptomycin resistance *E.coli* clinical (human) isolates with Disk Diffusion method.

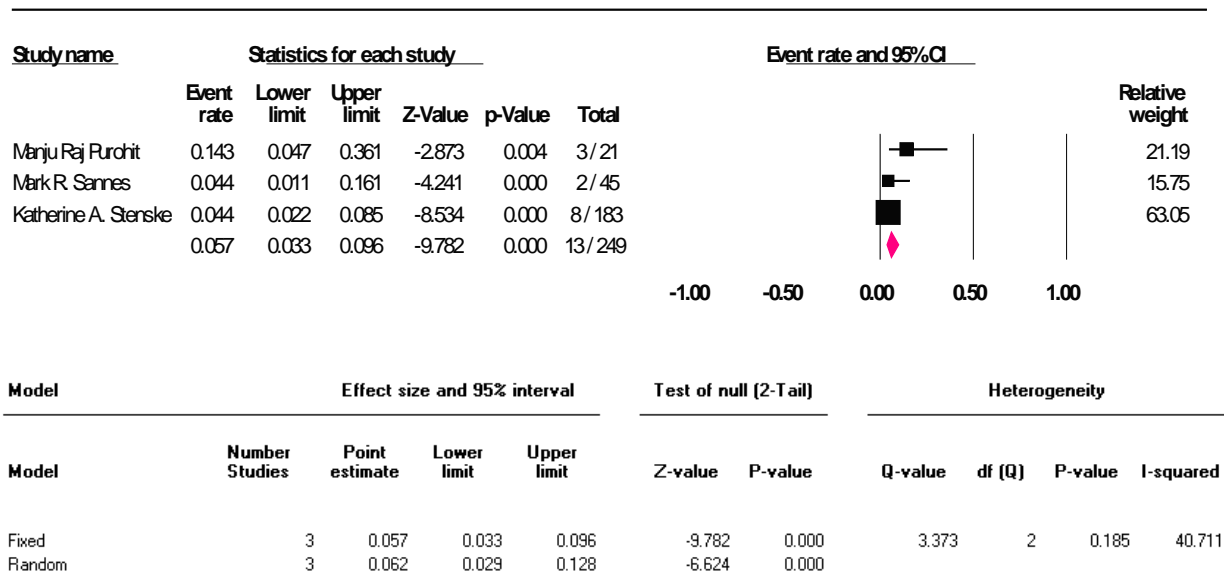

Fig S26. Prevalence of MDR *E.coli* animal isolates with Disk Diffusion method.

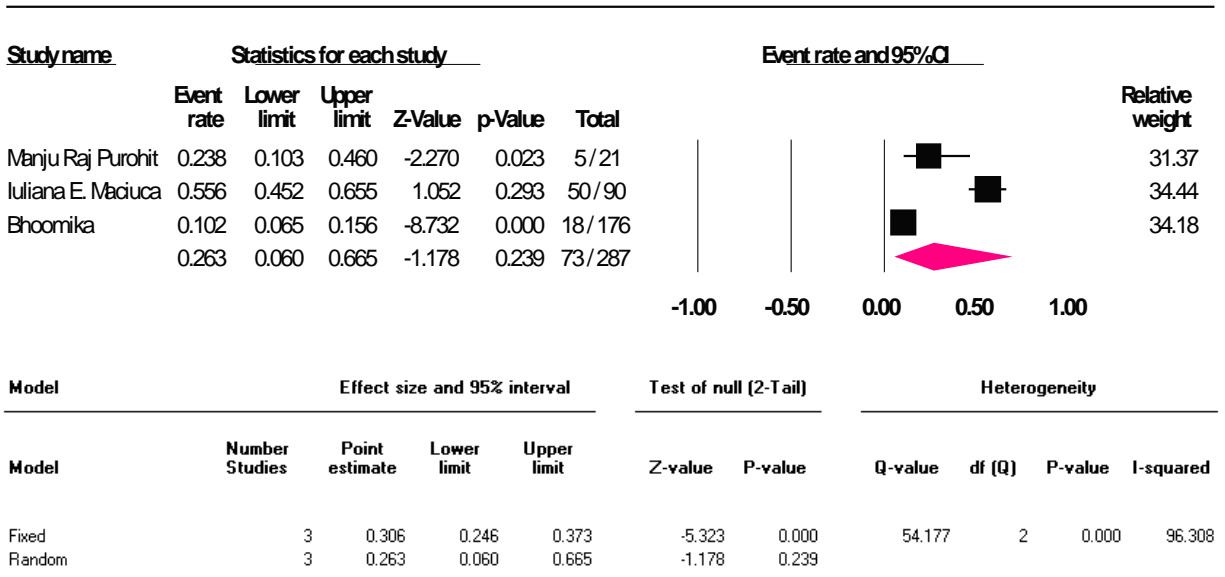

Fig S27. Prevalence of ESBL *E.coli* animal isolates with Disk Diffusion method.

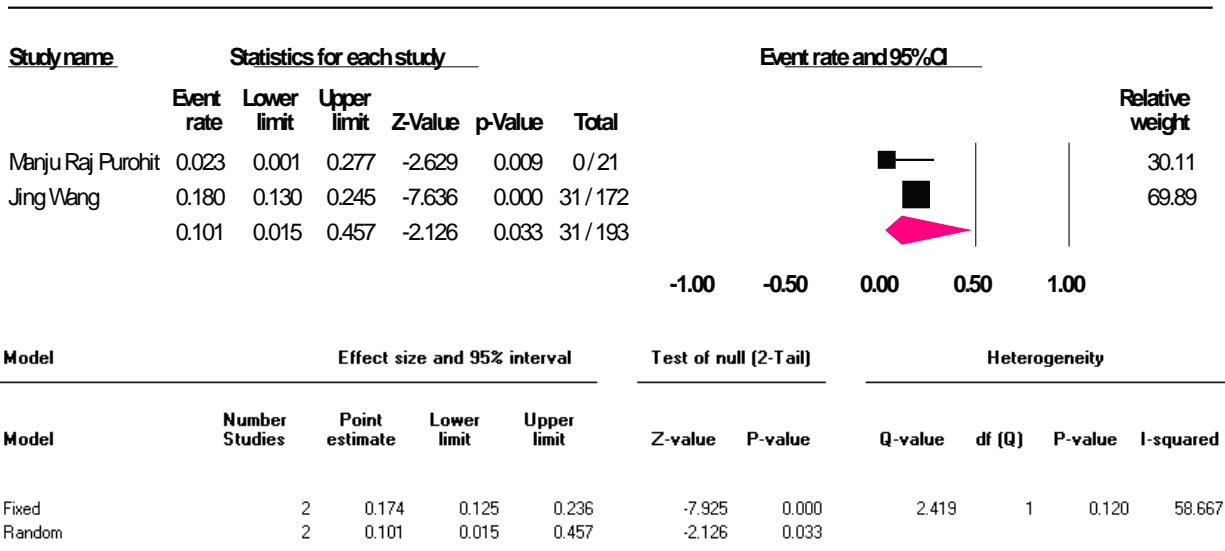

Fig S28. Prevalence of Colistin resistance animal isolated *E.coli* with Disk Diffusion method.

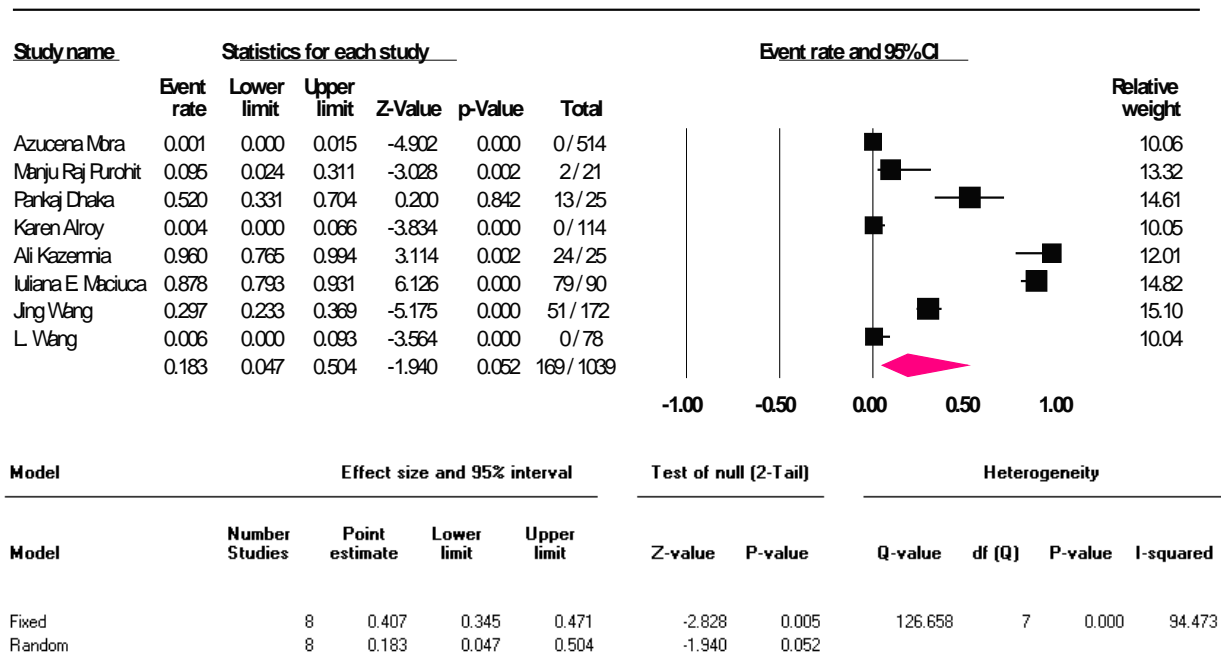

Fig S29. Prevalence of Ciprofloxacin resistance animal isolated *E.coli* with Disk Diffusion method.

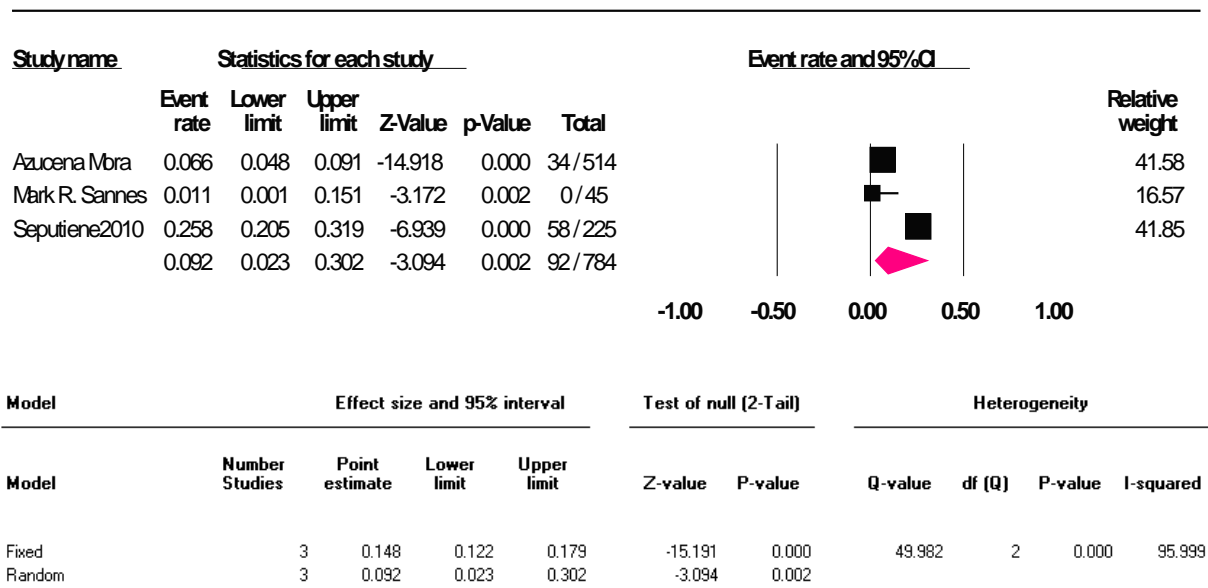

Fig S30. Prevalence of Trimethoprim resistance animal isolated *E.coli* with Disk Diffusion method.



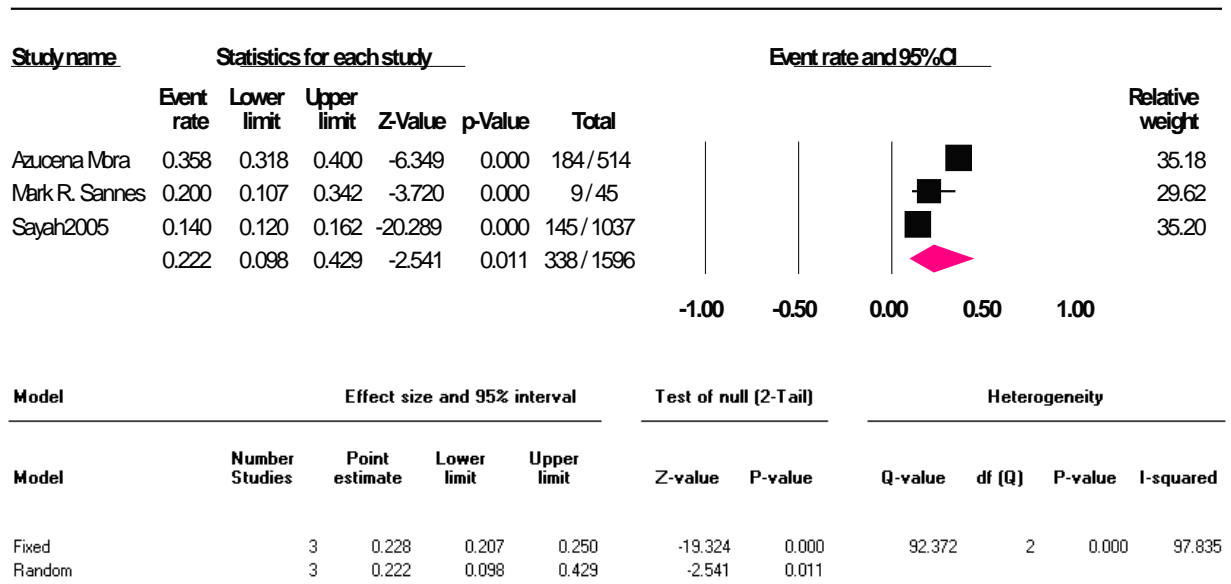

Fig S31. Prevalence of Sulfisoxazole resistance animal isolated *E.coli* with Disk Diffusion method.

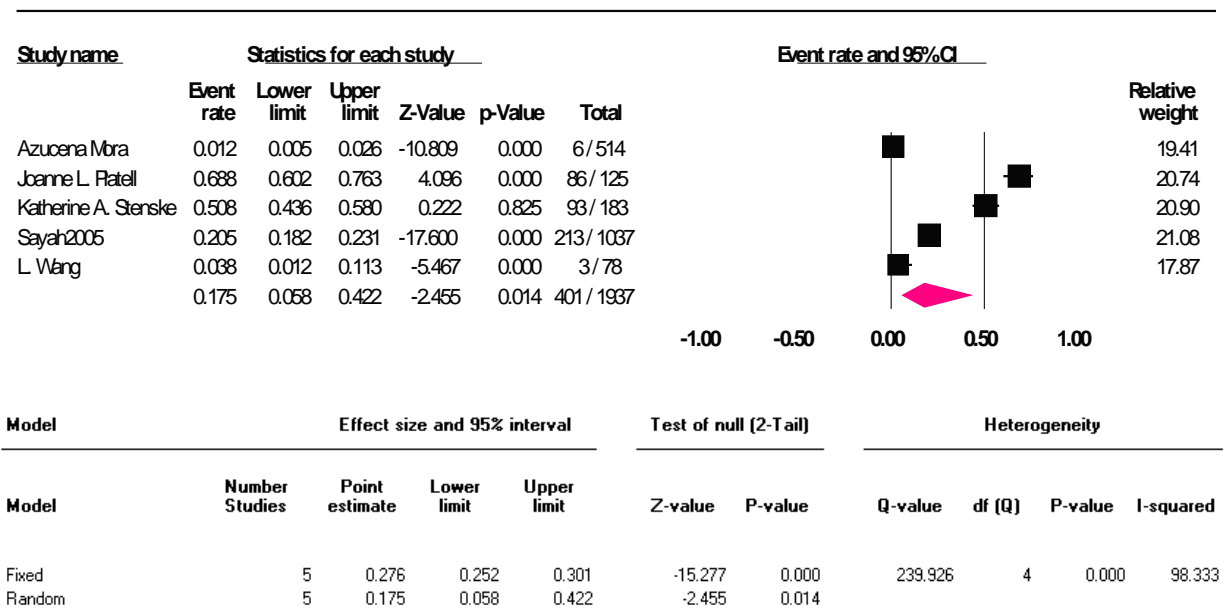

Fig S32. Prevalence of Cephalothin resistance animal isolated *E.coli* with Disk Diffusion method.

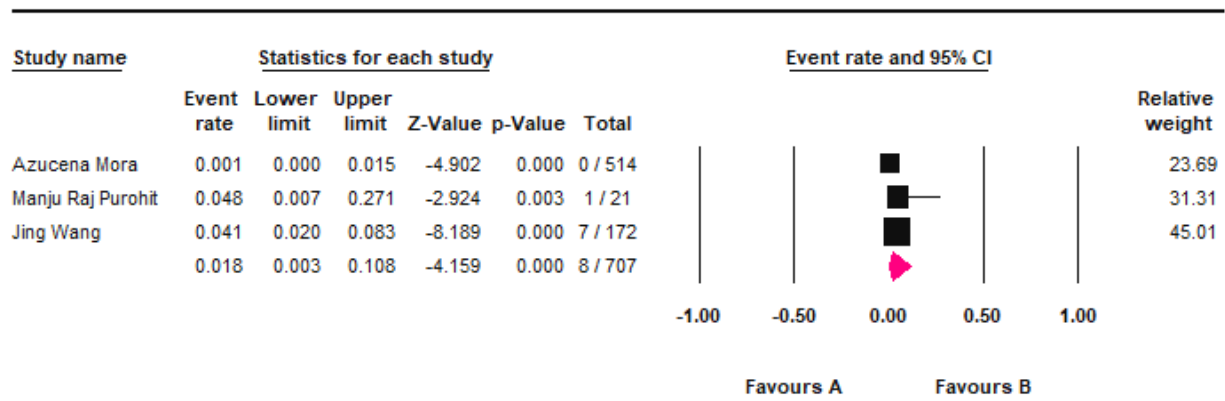

| Model  | Effect size and 95% interval |                |             |             | Test of null (2-Tail) |         | Heterogeneity |        |         |           |
|--------|------------------------------|----------------|-------------|-------------|-----------------------|---------|---------------|--------|---------|-----------|
|        | Number Studies               | Point estimate | Lower limit | Upper limit | Z-value               | P-value | Q-value       | df (Q) | P-value | I-squared |
| Fixed  | 3                            | 0.033          | 0.017       | 0.064       | -9.636                | 0.000   | 6.783         | 2      | 0.034   | 70.513    |
| Random | 3                            | 0.018          | 0.003       | 0.108       | -4.159                | 0.000   |               |        |         |           |

Fig S33. Prevalence of Amikacin resistance animal isolated *E.coli* with Disk Diffusion method.

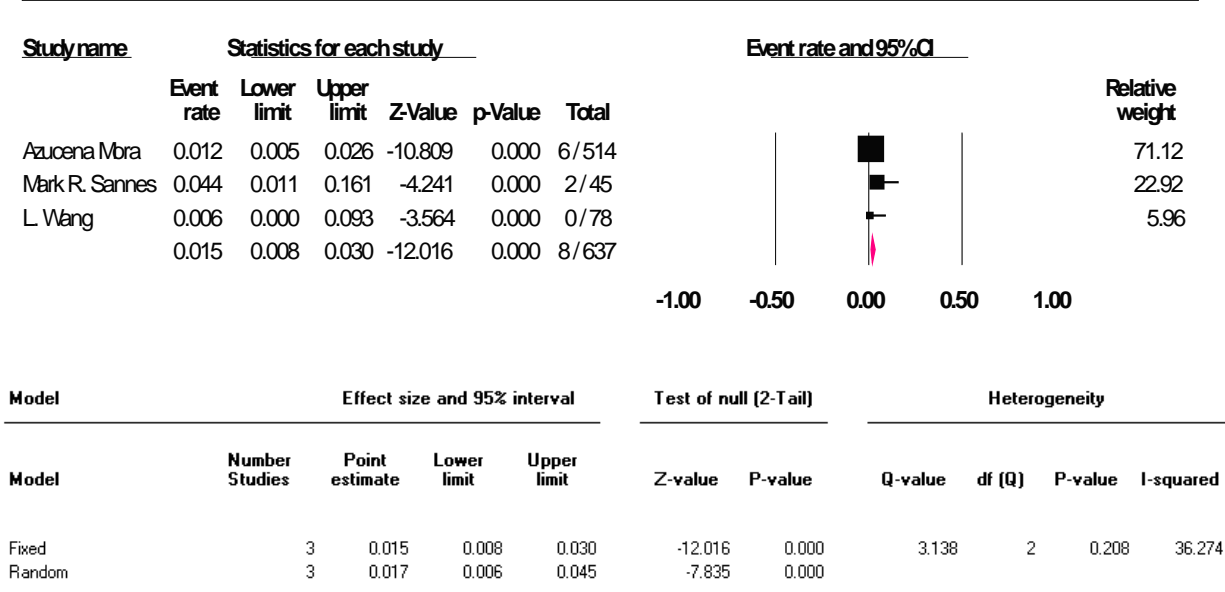

Fig S34. Prevalence of Amoxicillin/ Clavulanic acid resistance animal isolated *E.coli* with Disk Diffusion method.

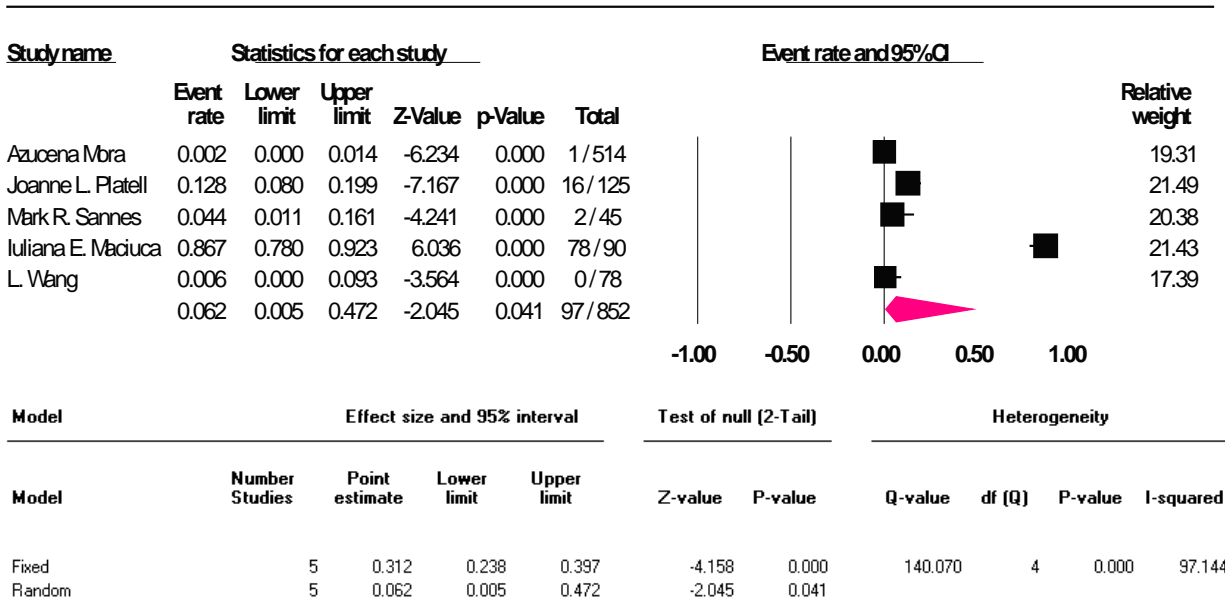

Fig S35. Prevalence of Cefoxitin resistance animal isolated *E.coli* with Disk Diffusion method.

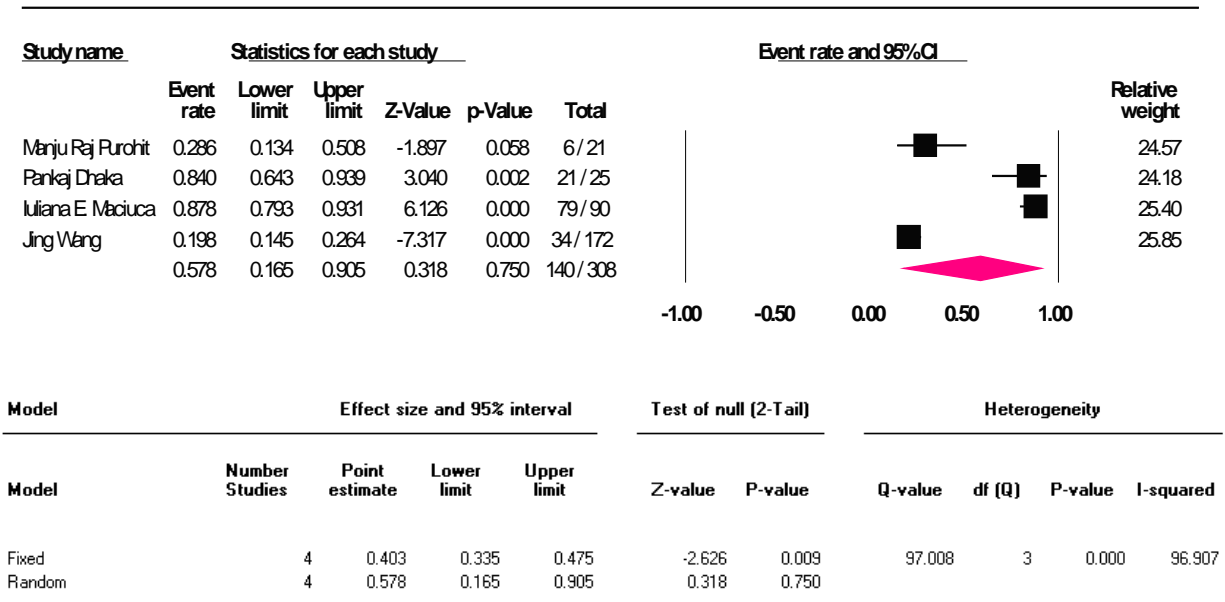

Fig S36. Prevalence of Cefotaxim resistance animal isolated *E.coli* with Disk Diffusion method.

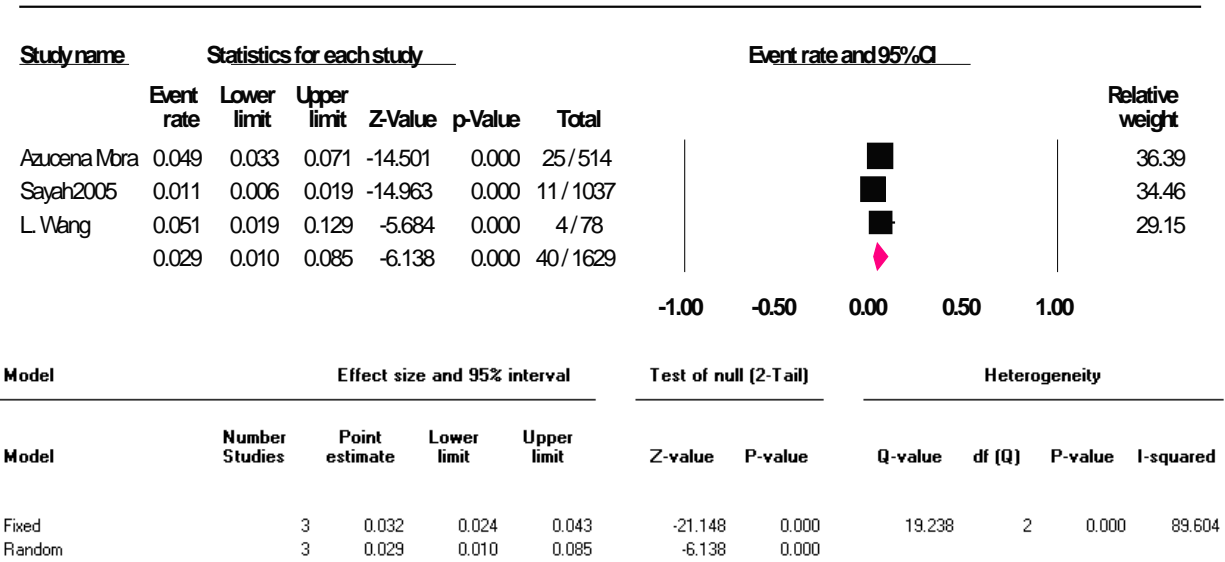

Fig S37. Prevalence of Chloramphenicol resistance animal isolated *E.coli* with Disk Diffusion method.

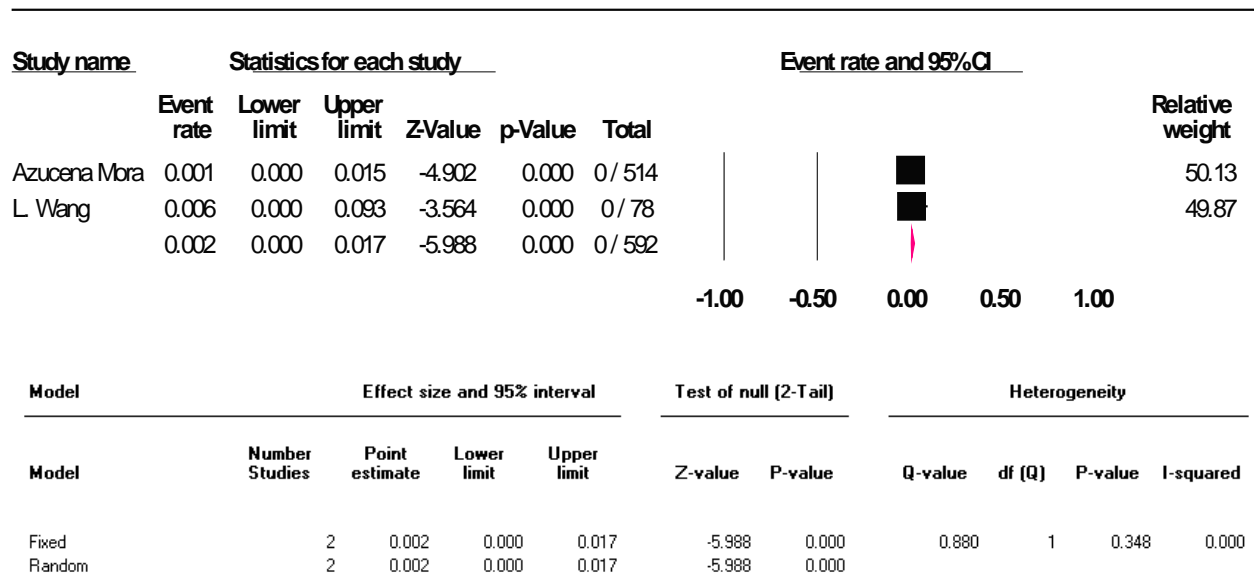

Fig S38. Prevalence of Ceftriaxone resistance animal isolated *E.coli* with Disk Diffusion method.

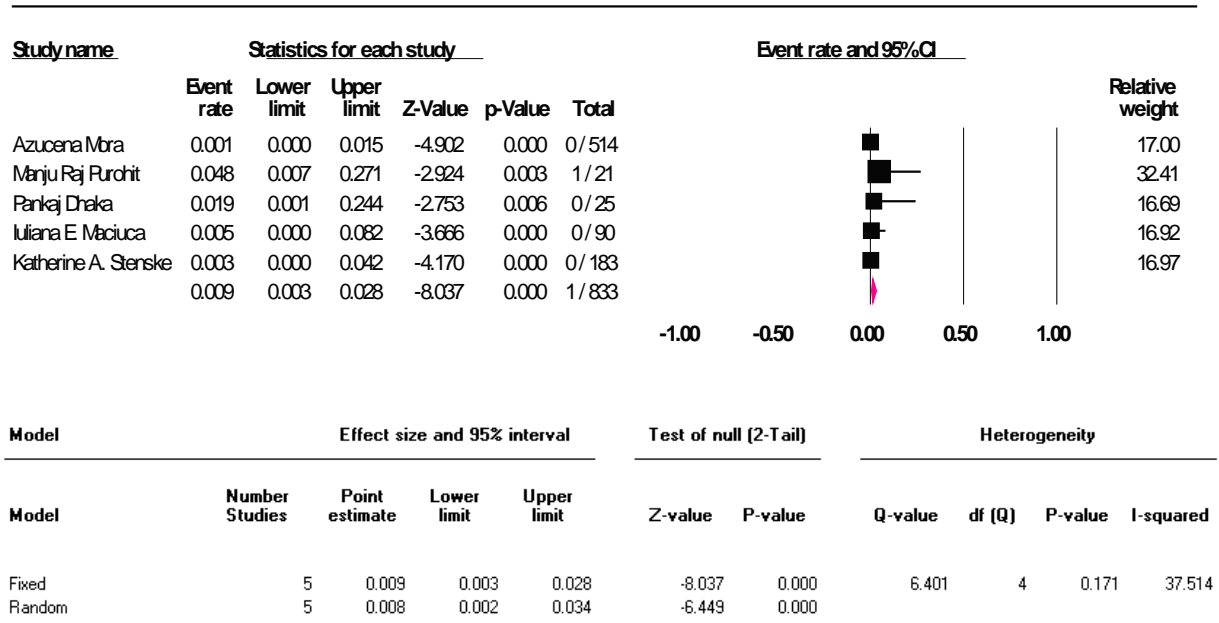

Fig S39. Prevalence of Imipenem resistance animal isolated *E.coli* with Disk Diffusion method.



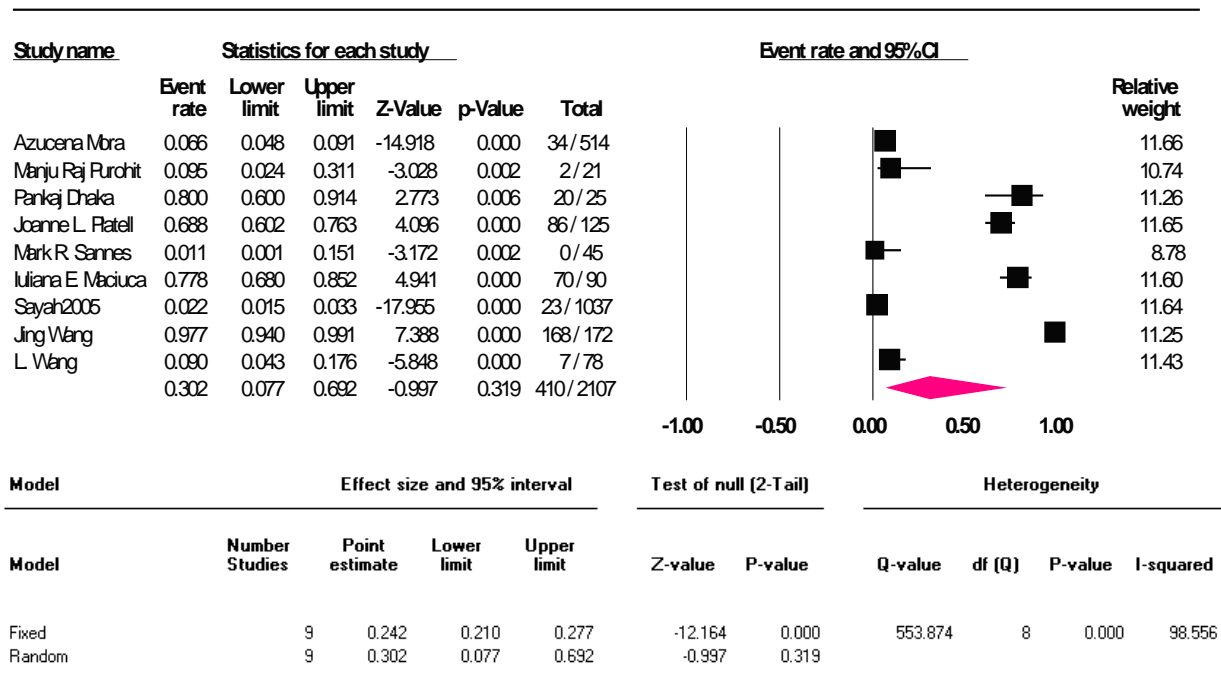

Fig S40. Prevalence of Trimethoprim/sulfamethoxazole resistance animal isolated *E.coli* with Disk Diffusion method.

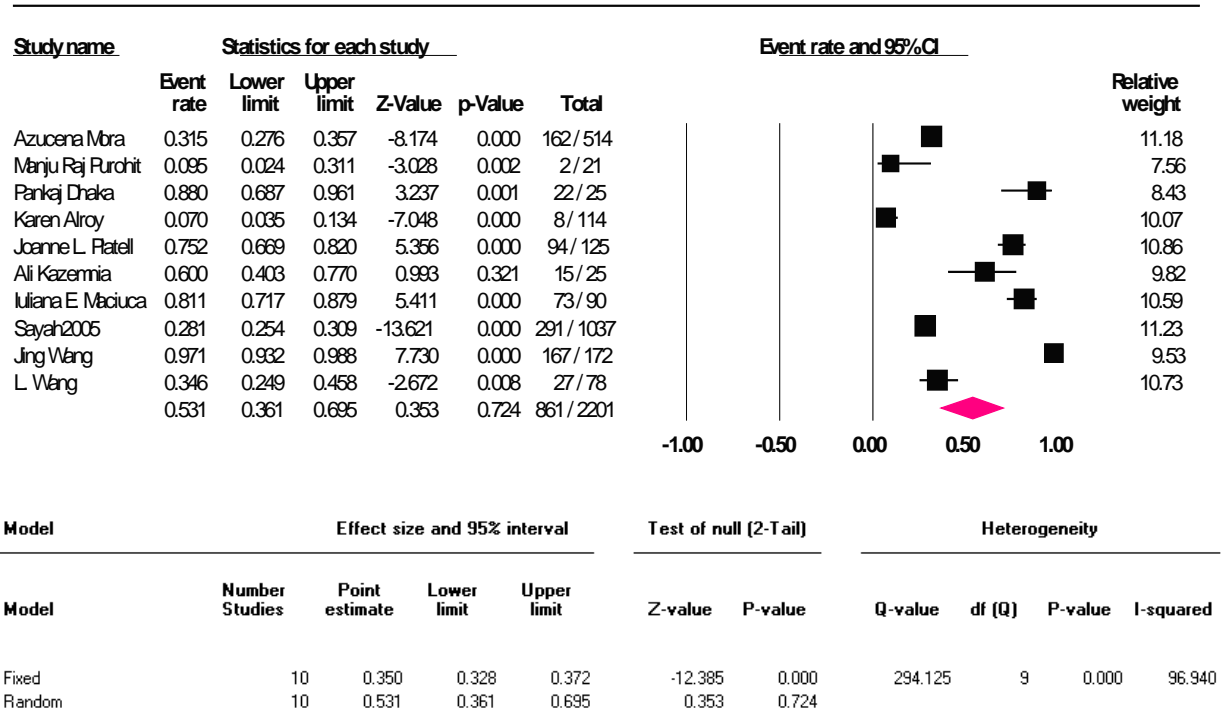

Fig S41. Prevalence of Tetracycline resistance animal isolated *E.coli* with Disk Diffusion method.

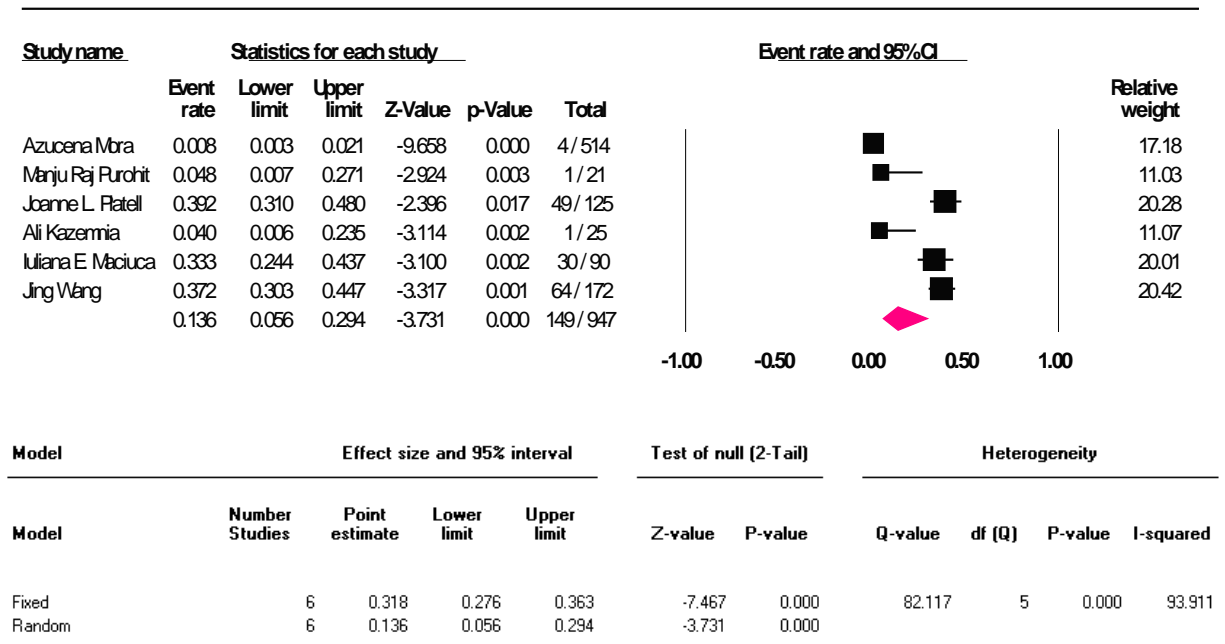

Fig S42. Prevalence of Gentamicin resistance animal isolated *E.coli* with Disk Diffusion method.

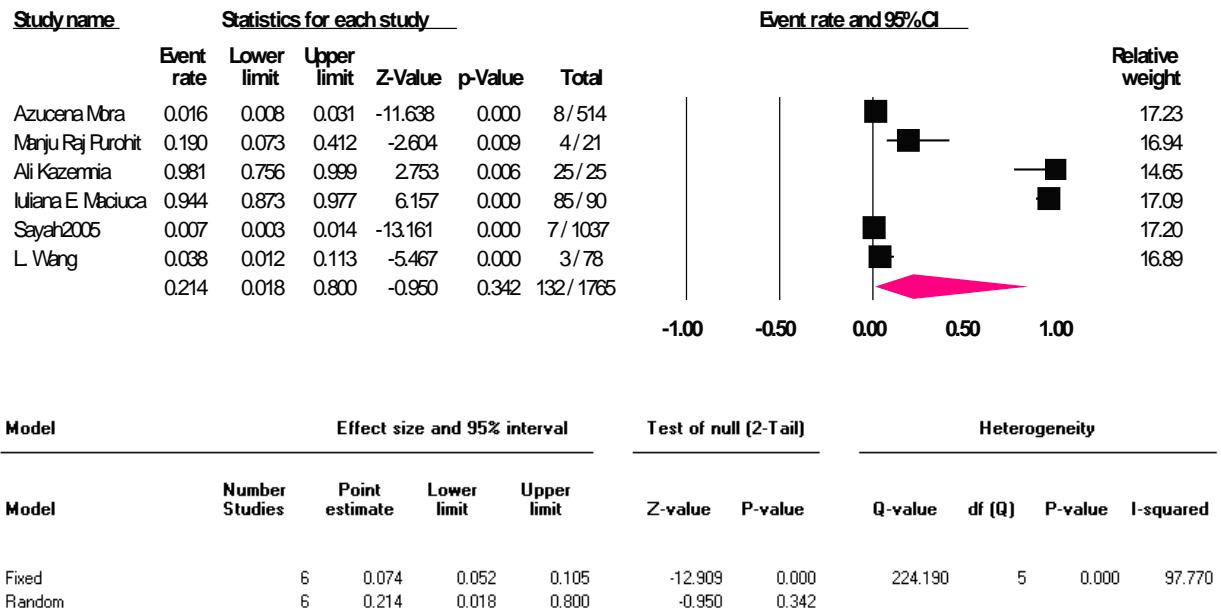

Fig S43. Prevalence of Nalidixic acid resistance animal isolated *E.coli* with Disk Diffusion method.

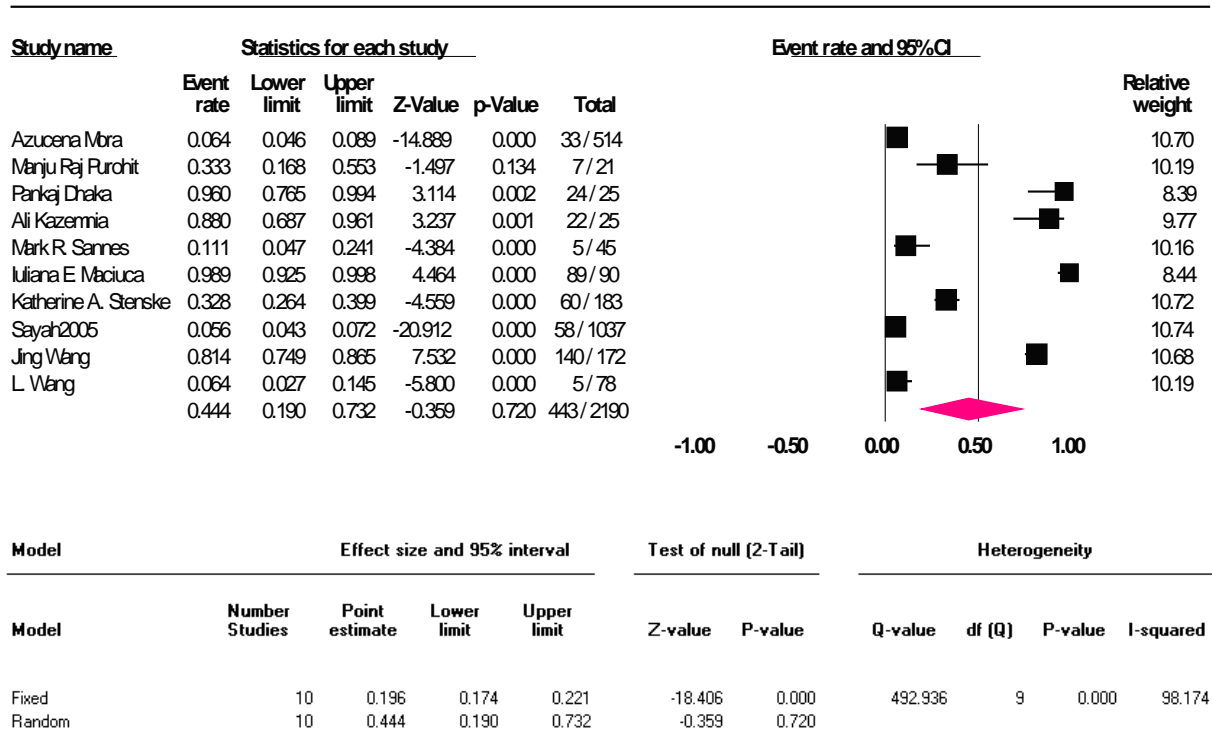

Fig S44. Prevalence of Ampicillin resistance animal isolated *E.coli* with Disk Diffusion method.

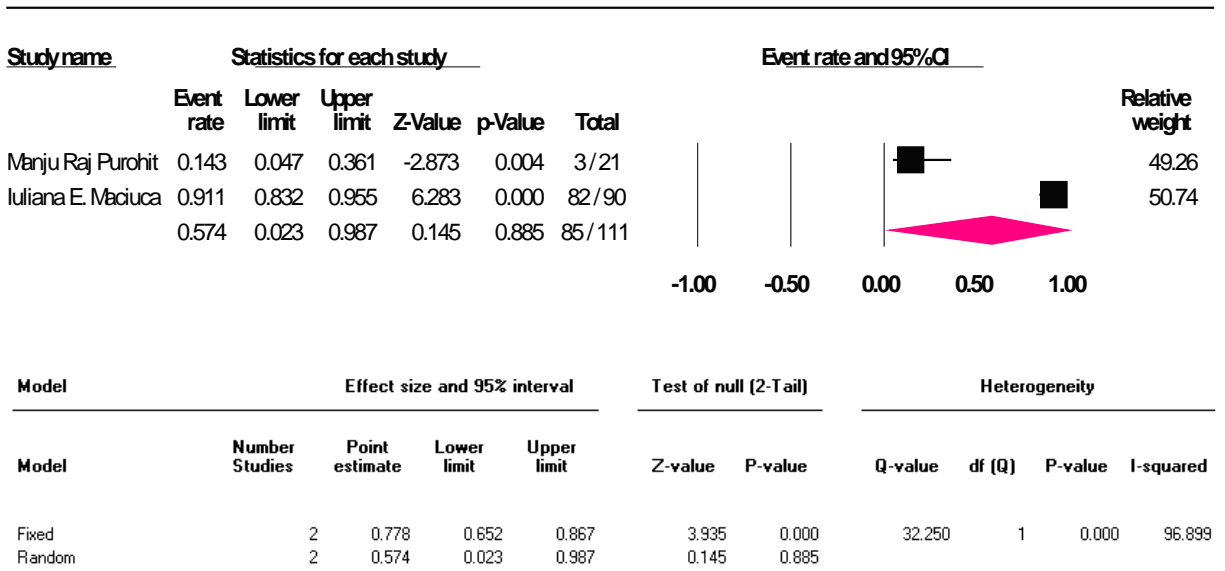

Fig S45. Prevalence of Ceftazidim resistance animal isolated *E.coli* with Disk Diffusion method.

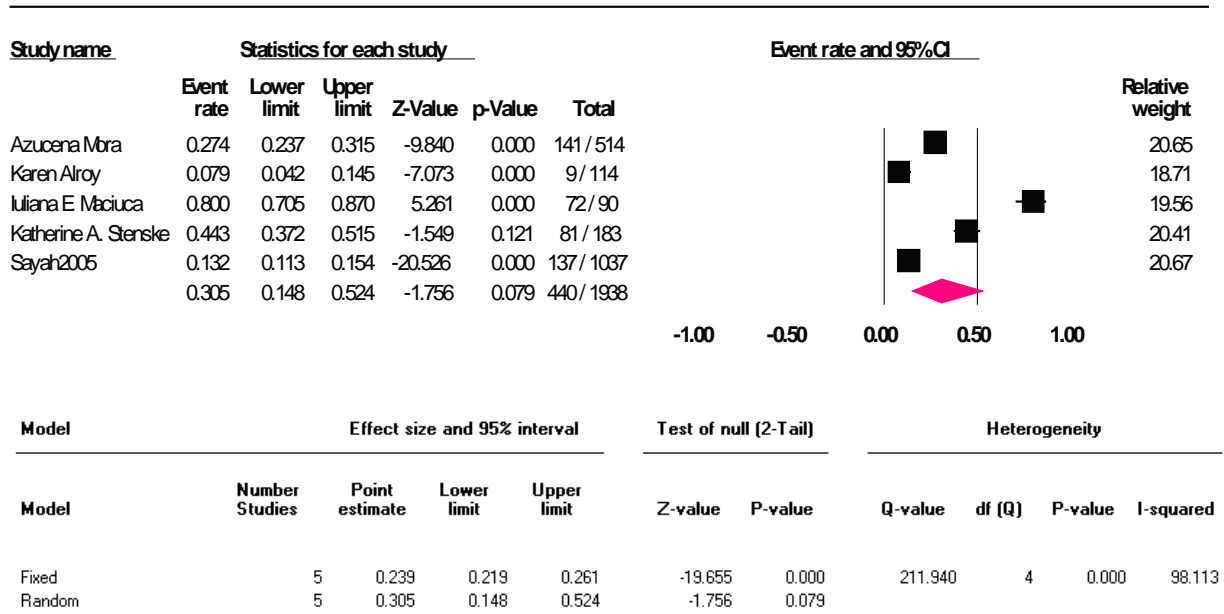

Fig S46. Prevalence of Streptomycin resistance animal isolated *E.coli* with Disk Diffusion method.

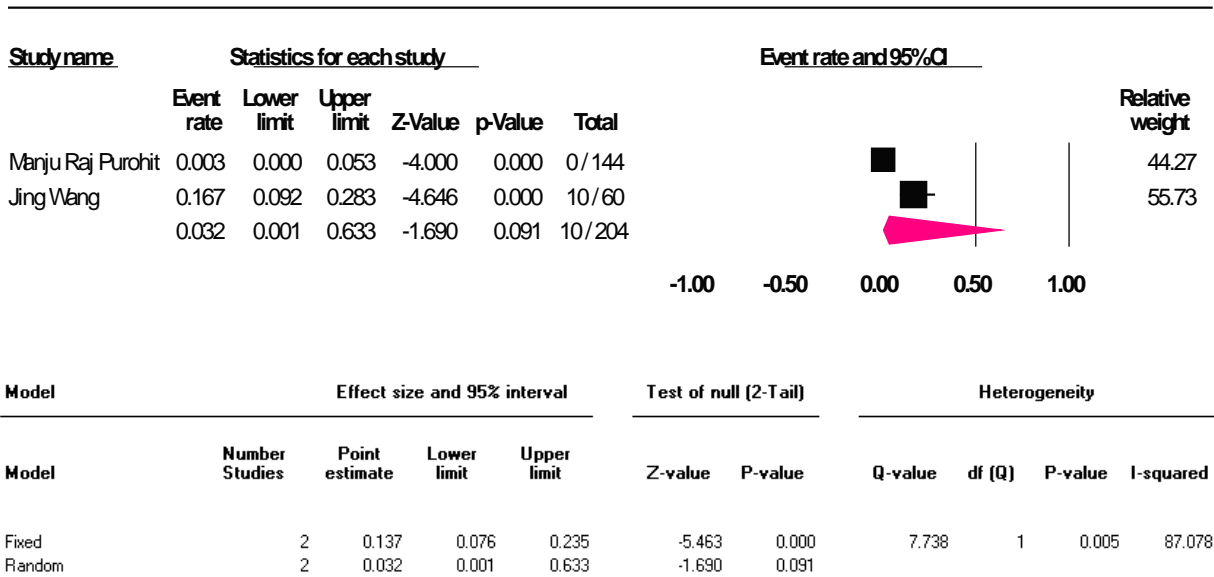

Fig S47. Prevalence of Colistin resistance environment/food isolated *E.coli* with Disk Diffusion method.



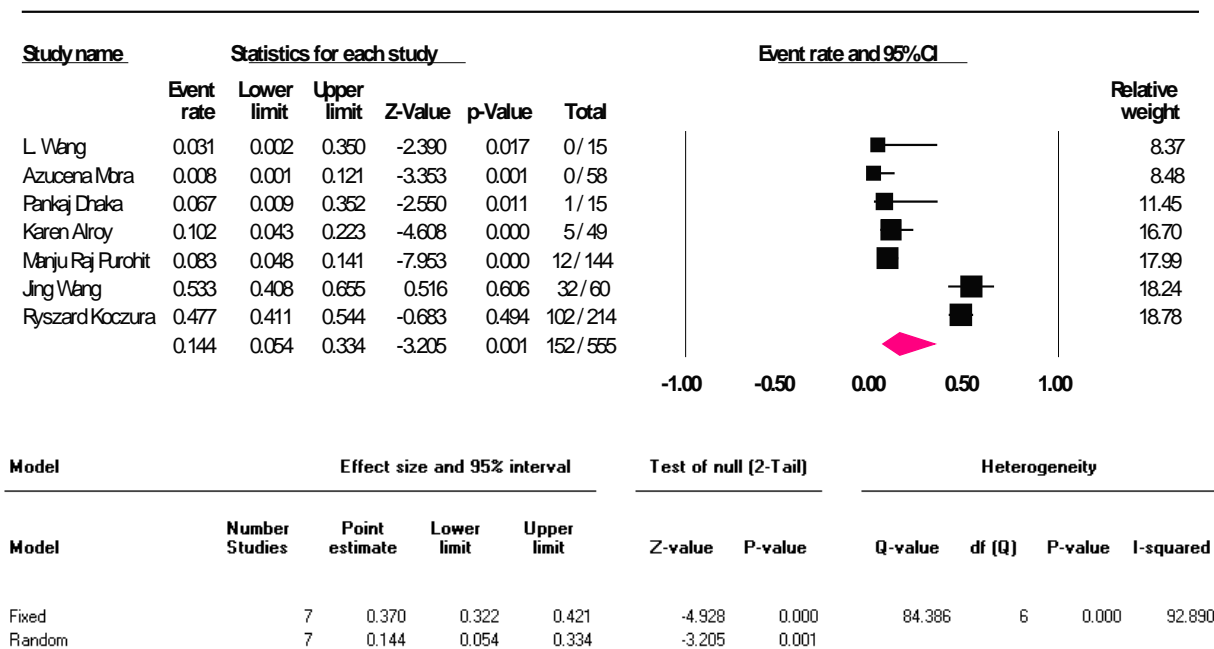

Fig S48. Prevalence of Ciprofloxacin resistance environment/food isolated *E.coli* with Disk Diffusion method.

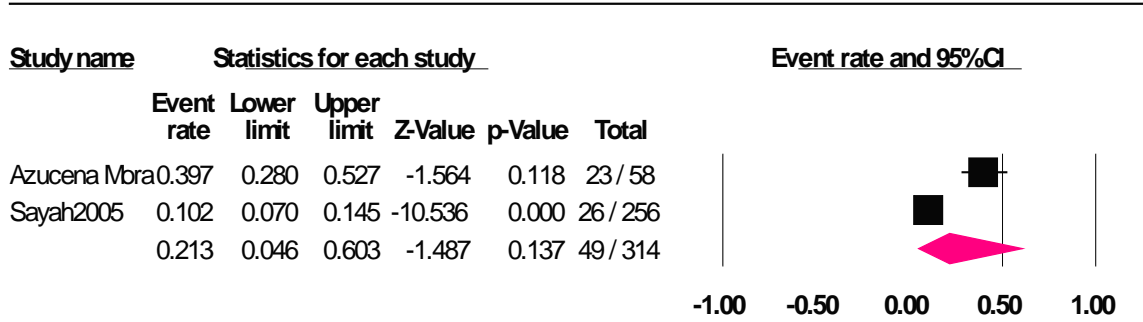

| Model  | Effect size and 95% interval |                |             |             | Test of null (2-Tail) |         | Heterogeneity |        |         |           |
|--------|------------------------------|----------------|-------------|-------------|-----------------------|---------|---------------|--------|---------|-----------|
|        | Number Studies               | Point estimate | Lower limit | Upper limit | Z-value               | P-value | Q-value       | df (Q) | P-value | I-squared |
| Fixed  | 2                            | 0.179          | 0.136       | 0.231       | -9.300                | 0.000   | 26.973        | 1      | 0.000   | 96.293    |
| Random | 2                            | 0.213          | 0.046       | 0.603       | -1.487                | 0.137   |               |        |         |           |

Fig S49. Prevalence of Sulfoxazole resistance environment/food isolated *E.coli* with Disk Diffusion method.

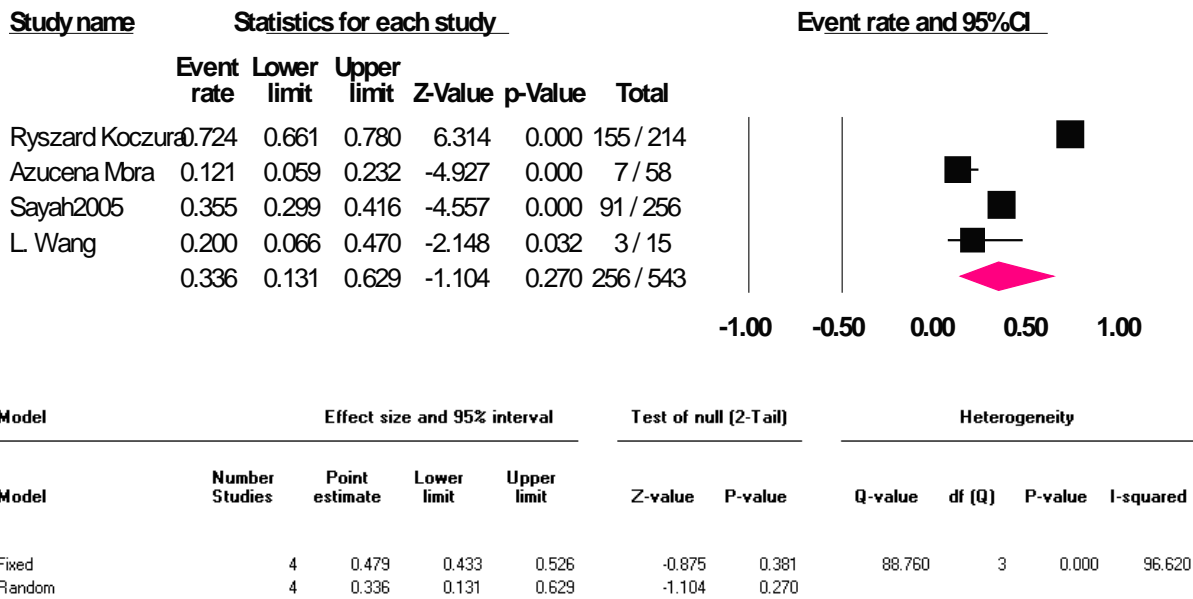

Fig S50. Prevalence of Cephalothin resistance environment/food isolated *E.coli* with Disk Diffusion method.

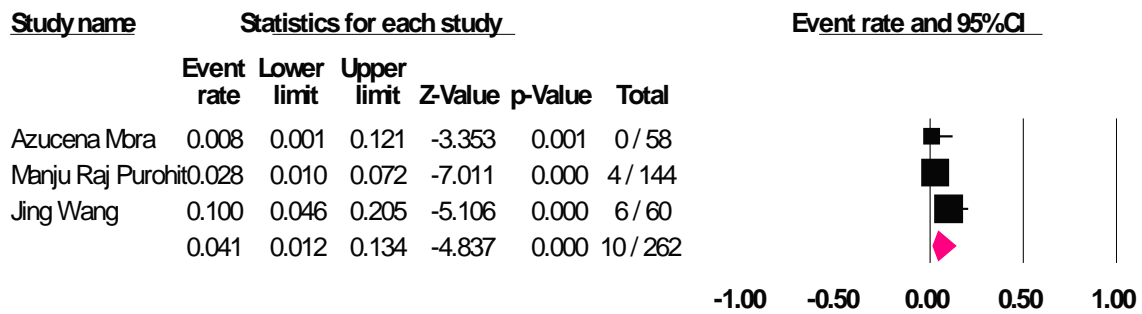

| Model  | Effect size and 95% interval |                |             |             | Test of null (2-Tail) |         | Heterogeneity |        |         |           |
|--------|------------------------------|----------------|-------------|-------------|-----------------------|---------|---------------|--------|---------|-----------|
|        | Number Studies               | Point estimate | Lower limit | Upper limit | Z-value               | P-value | Q-value       | df (Q) | P-value | I-squared |
| Fixed  | 3                            | 0.054          | 0.029       | 0.096       | -8.968                | 0.000   | 6.046         | 2      | 0.049   | 66.919    |
| Random | 3                            | 0.041          | 0.012       | 0.134       | -4.837                | 0.000   |               |        |         |           |

Fig S51. Prevalence of Amikacin resistance environment/food isolated *E.coli* with Disk Diffusion method.

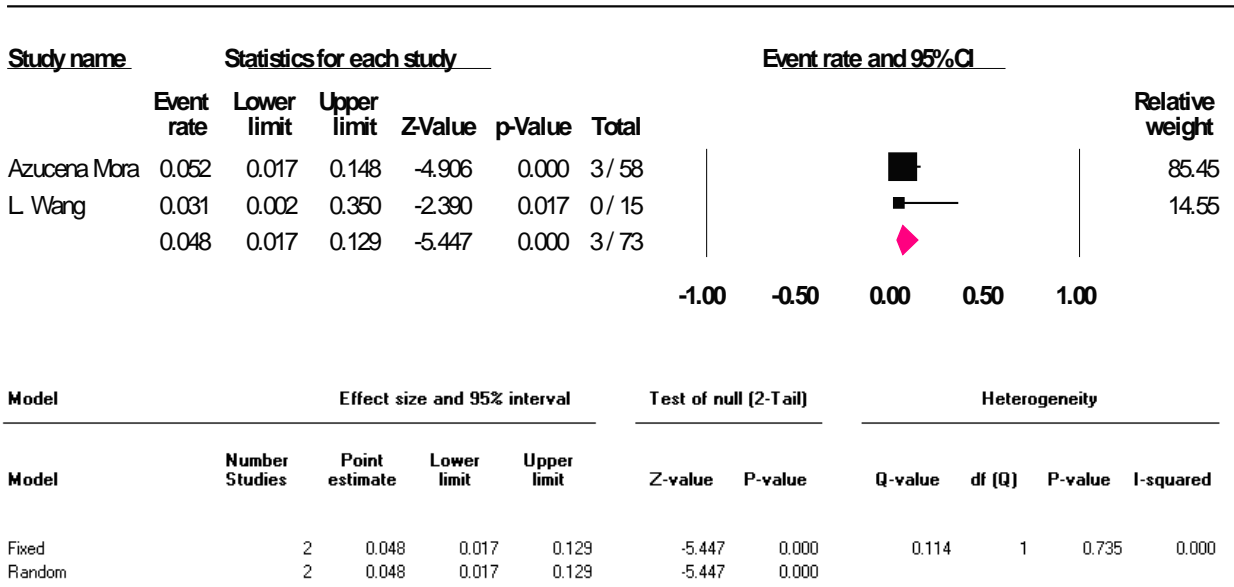

Fig S52. Prevalence of Amoxicillin/Clavulanic acid resistance environment/food isolated *E.coli* with Disk Diffusion method.

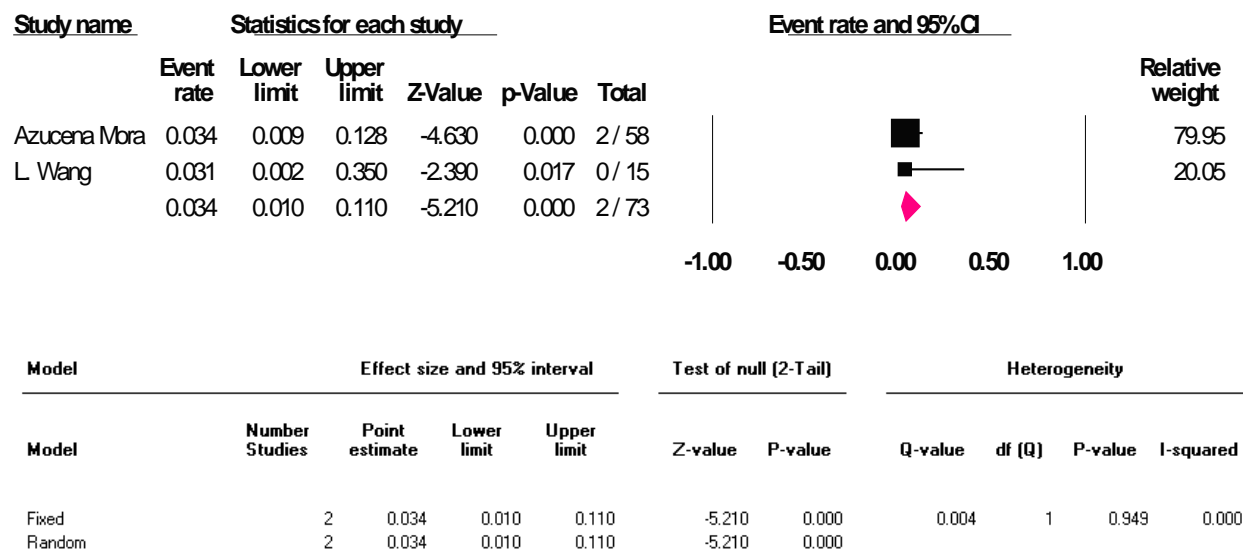

Fig S53. Prevalence of Cefoxitin resistance environment/food isolated *E.coli* with Disk Diffusion method.

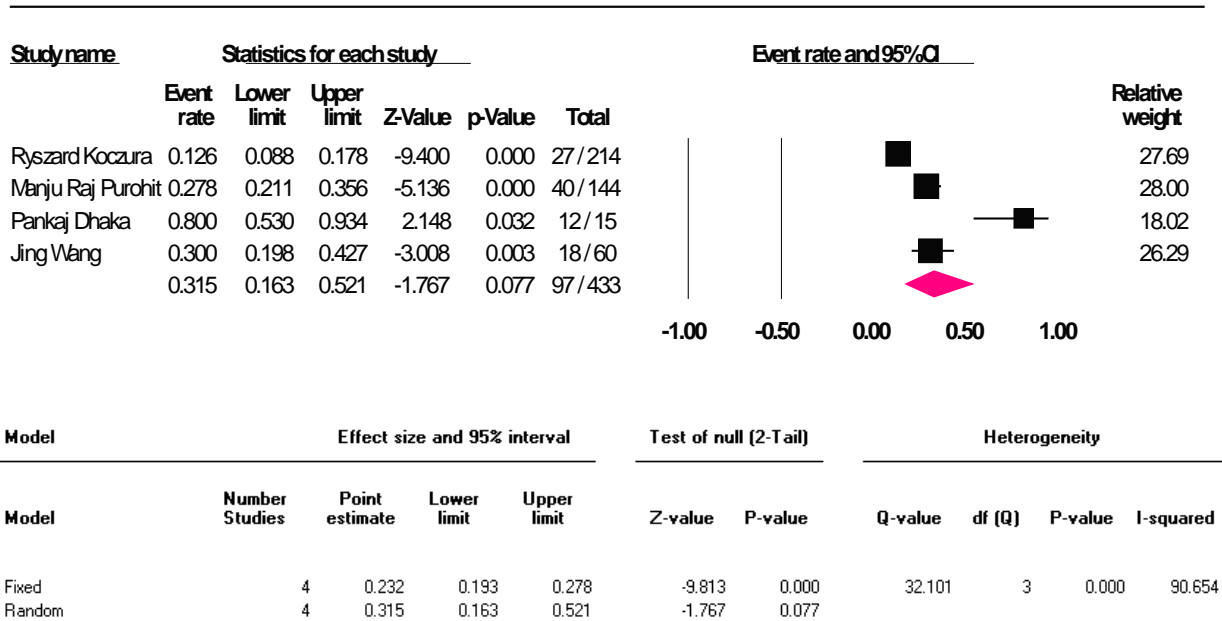

Fig S54. Prevalence of Cefotaxim resistance environment/food isolated *E.coli* with Disk Diffusion method.

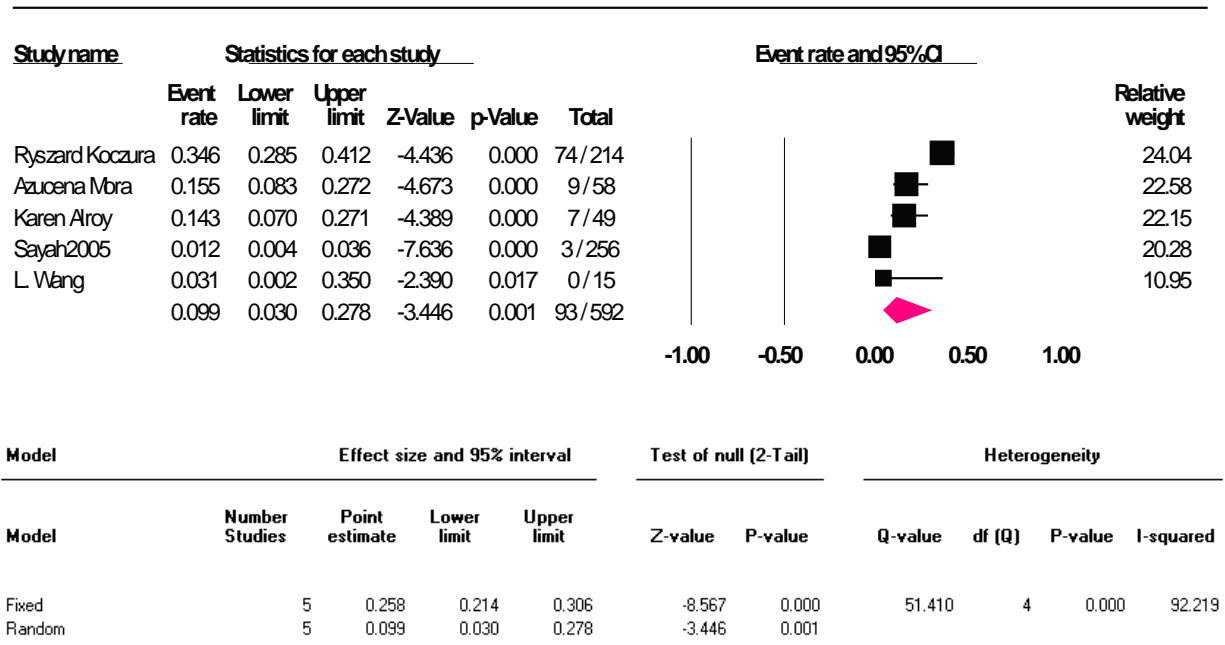

Fig S55. Prevalence of Chloramphenicol resistance environment/food isolated *E.coli* with Disk Diffusion method.



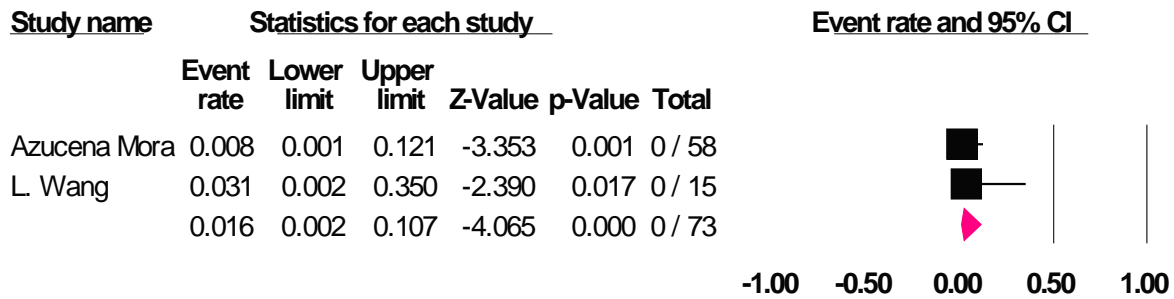

| Model  | Effect size and 95% interval |                |             |             | Test of null (2-Tail) |         | Heterogeneity |        |         |           |
|--------|------------------------------|----------------|-------------|-------------|-----------------------|---------|---------------|--------|---------|-----------|
| Model  | Number Studies               | Point estimate | Lower limit | Upper limit | Z-value               | P-value | Q-value       | df (Q) | P-value | I-squared |
| Fixed  | 2                            | 0.016          | 0.002       | 0.107       | -4.065                | 0.000   | 0.432         | 1      | 0.511   | 0.000     |
| Random | 2                            | 0.016          | 0.002       | 0.107       | -4.065                | 0.000   |               |        |         |           |

Fig S56. Prevalence of Ceftriaxone resistance environment/food isolated *E.coli* with Disk Diffusion method.

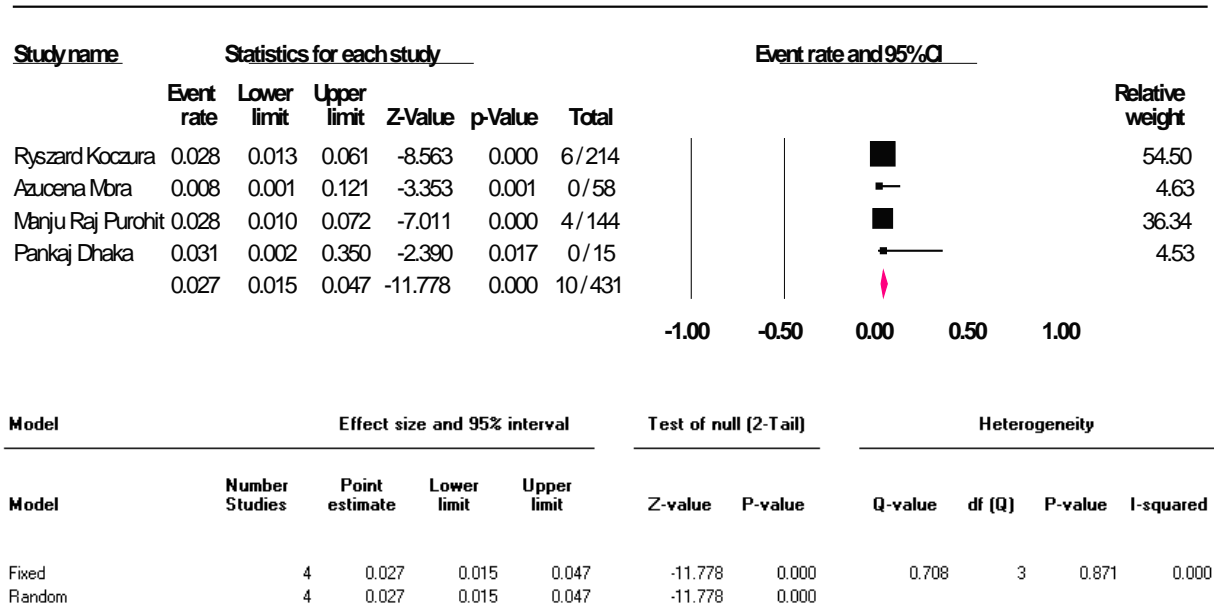

Fig S57. Prevalence of Imipenem resistance environment/food isolated *E.coli* with Disk Diffusion method.

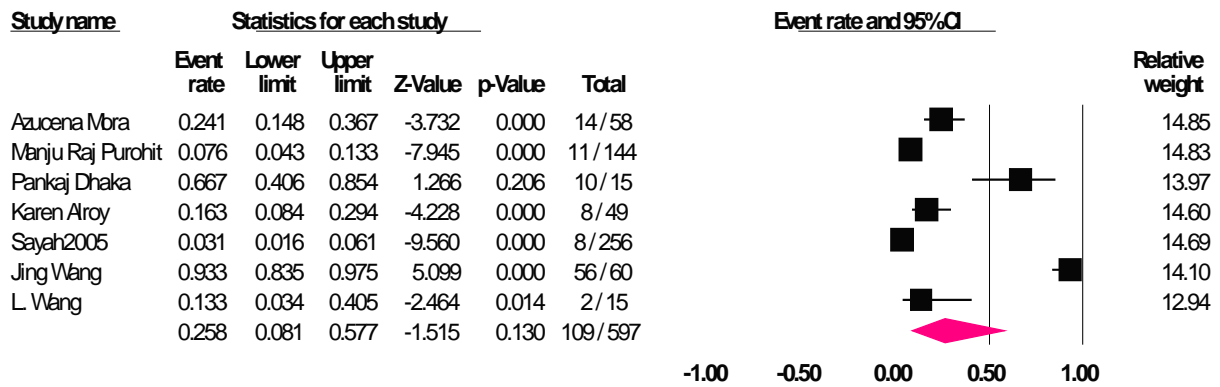

| Model  | Effect size and 95% interval |                |             |             | Test of null (2-Tail) |         | Heterogeneity |        |         |           |
|--------|------------------------------|----------------|-------------|-------------|-----------------------|---------|---------------|--------|---------|-----------|
|        | Number Studies               | Point estimate | Lower limit | Upper limit | Z-value               | P-value | Q-value       | df (Q) | P-value | I-squared |
| Fixed  | 7                            | 0.182          | 0.142       | 0.230       | -9.965                | 0.000   | 120.683       | 6      | 0.000   | 95.028    |
| Random | 7                            | 0.258          | 0.081       | 0.577       | -1.515                | 0.130   |               |        |         |           |

Fig S58. Prevalence of Trimethoprim/sulfamethoxazole resistance environment/food isolated *E.coli* with Disk Diffusion method.

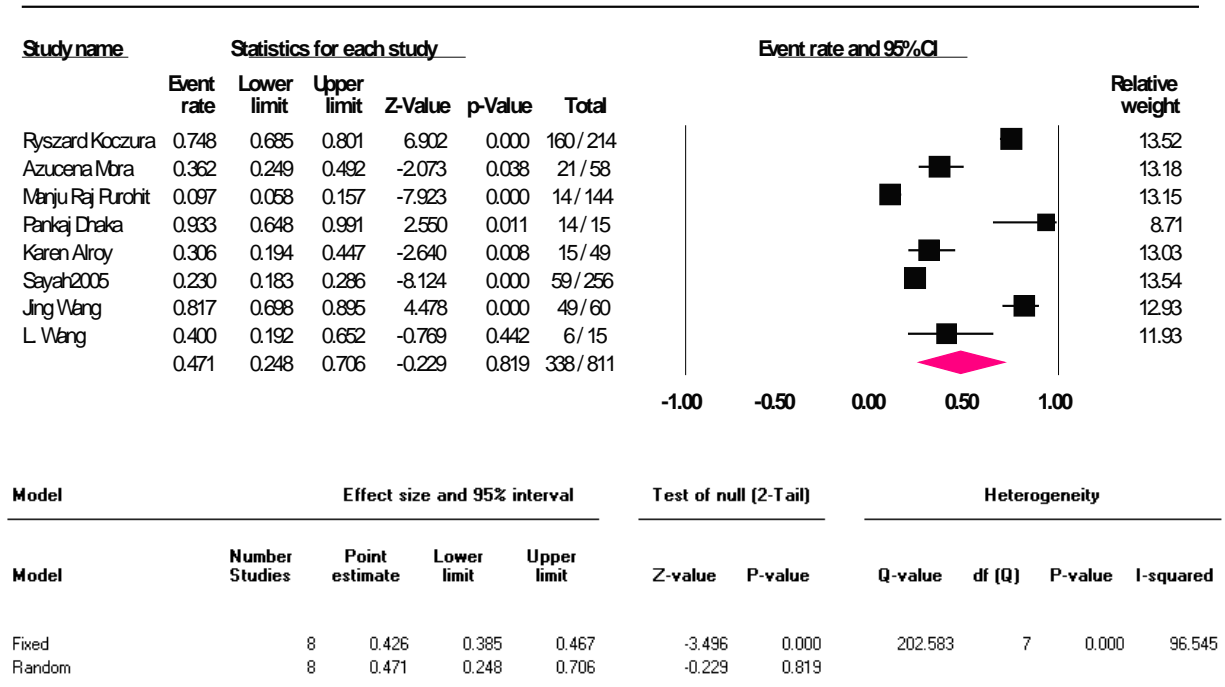

Fig S59. Prevalence of Tetracycline resistance environment/food isolated *E.coli* with Disk Diffusion method.

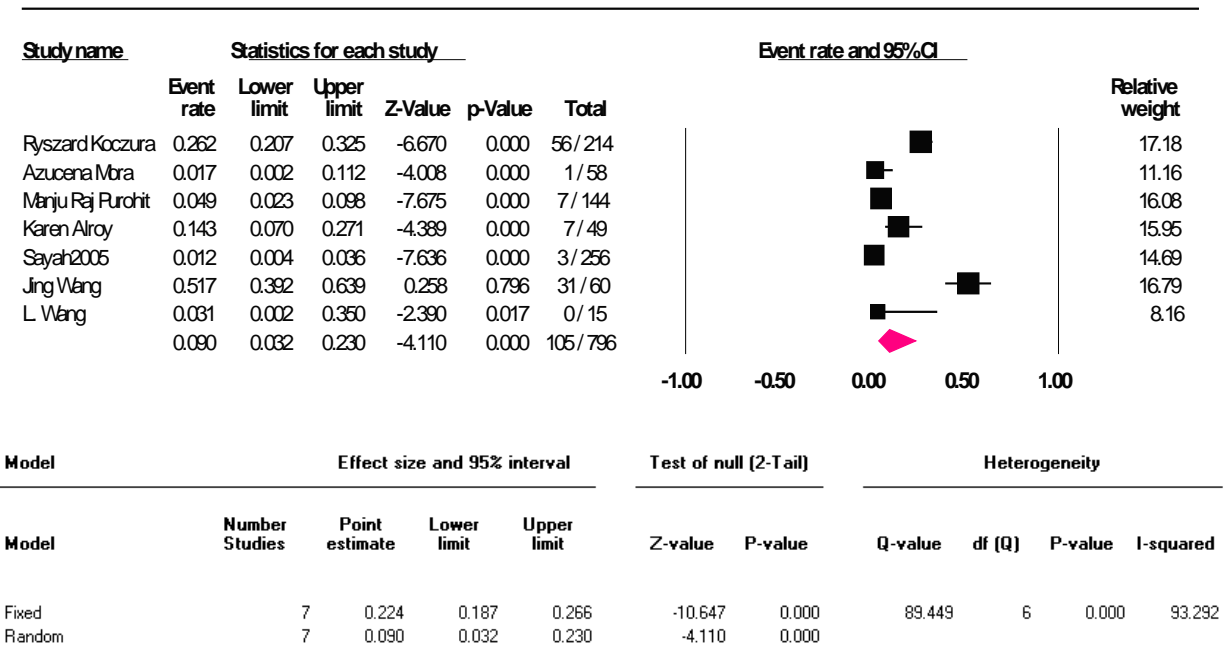

Fig S60. Prevalence of Gentamicin resistance environment/food isolated *E.coli* with Disk Diffusion method.

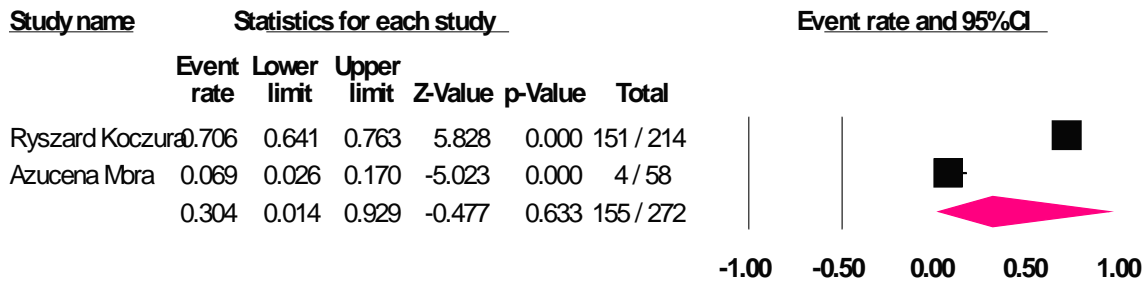

| Model  | Effect size and 95% interval |                |             |             | Test of null (2-Tail) |         | Heterogeneity |        |         |           |
|--------|------------------------------|----------------|-------------|-------------|-----------------------|---------|---------------|--------|---------|-----------|
|        | Number Studies               | Point estimate | Lower limit | Upper limit | Z-value               | P-value | Q-value       | df (Q) | P-value | I-squared |
| Fixed  | 2                            | 0.647          | 0.580       | 0.708       | 4.202                 | 0.000   | 41.539        | 1      | 0.000   | 97.593    |
| Random | 2                            | 0.304          | 0.014       | 0.929       | -0.477                | 0.633   |               |        |         |           |

Fig S61. Prevalence of Kanamycin resistance environment/food isolated *E.coli* with Disk Diffusion method.

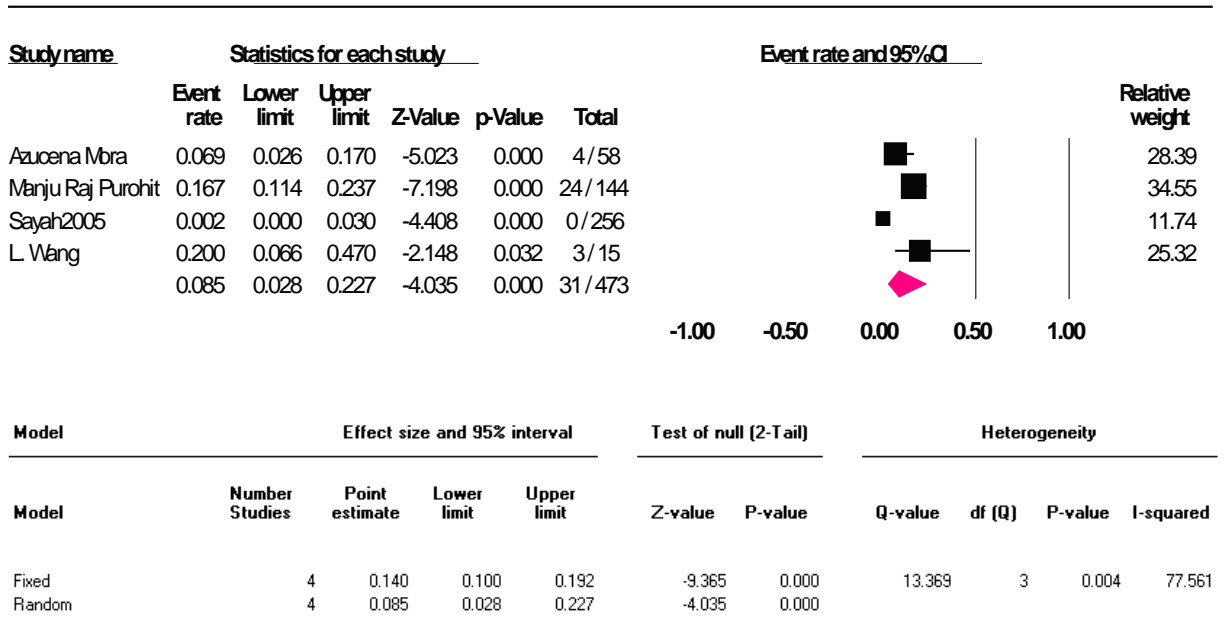

Fig S62. Prevalence of Nalidixic acid resistance environment/food isolated *E.coli* with Disk Diffusion method.

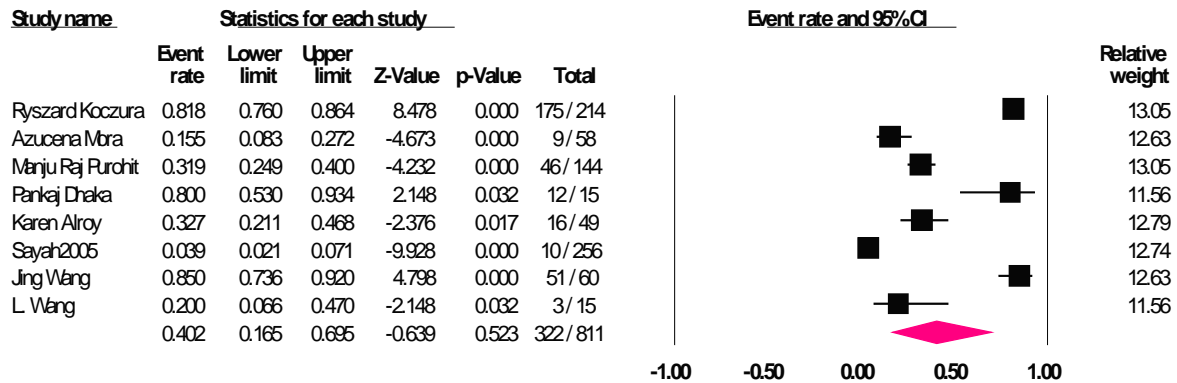

| Model  | Effect size and 95% interval |                |             |             | Test of null (2-Tail) |         | Heterogeneity |        |         |           |
|--------|------------------------------|----------------|-------------|-------------|-----------------------|---------|---------------|--------|---------|-----------|
|        | Number Studies               | Point estimate | Lower limit | Upper limit | Z-value               | P-value | Q-value       | df (Q) | P-value | I-squared |
| Fixed  | 8                            | 0.466          | 0.419       | 0.514       | -1.374                | 0.169   | 246.187       | 7      | 0.000   | 97.157    |
| Random | 8                            | 0.402          | 0.165       | 0.695       | -0.639                | 0.523   |               |        |         |           |

Fig S63. Prevalence of Ampicillinresistance environment/food isolated *E.coli* with Disk Diffusion method.



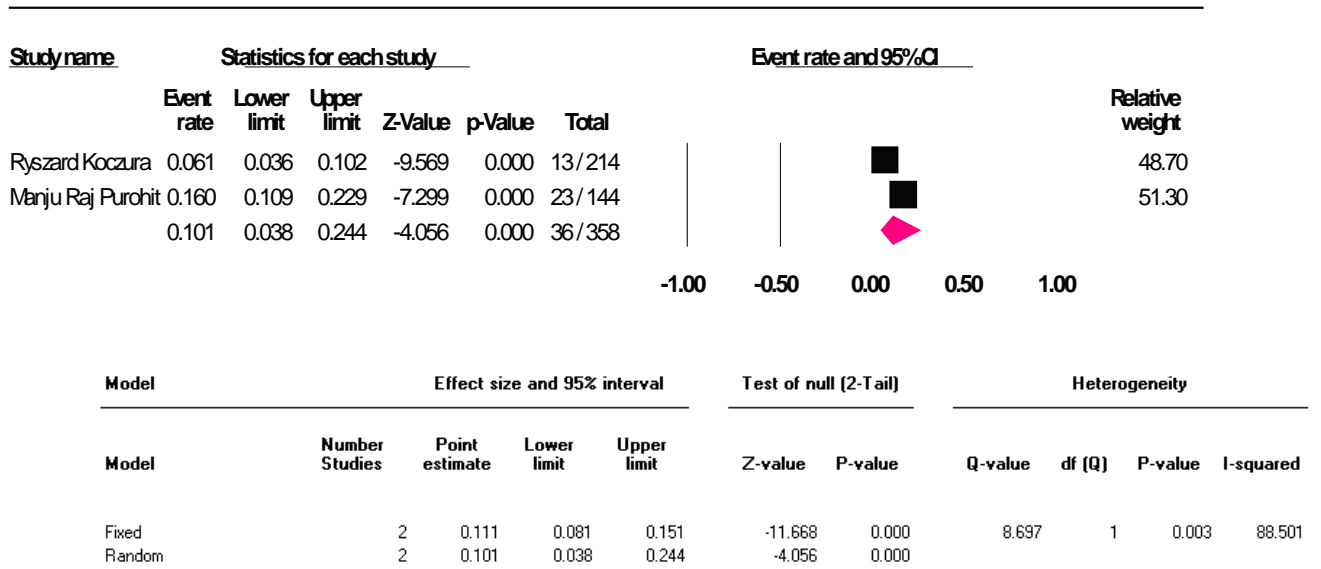

Fig S64. Prevalence of Ceftazidim resistance environment/food isolated *E.coli* with Disk Diffusion method.

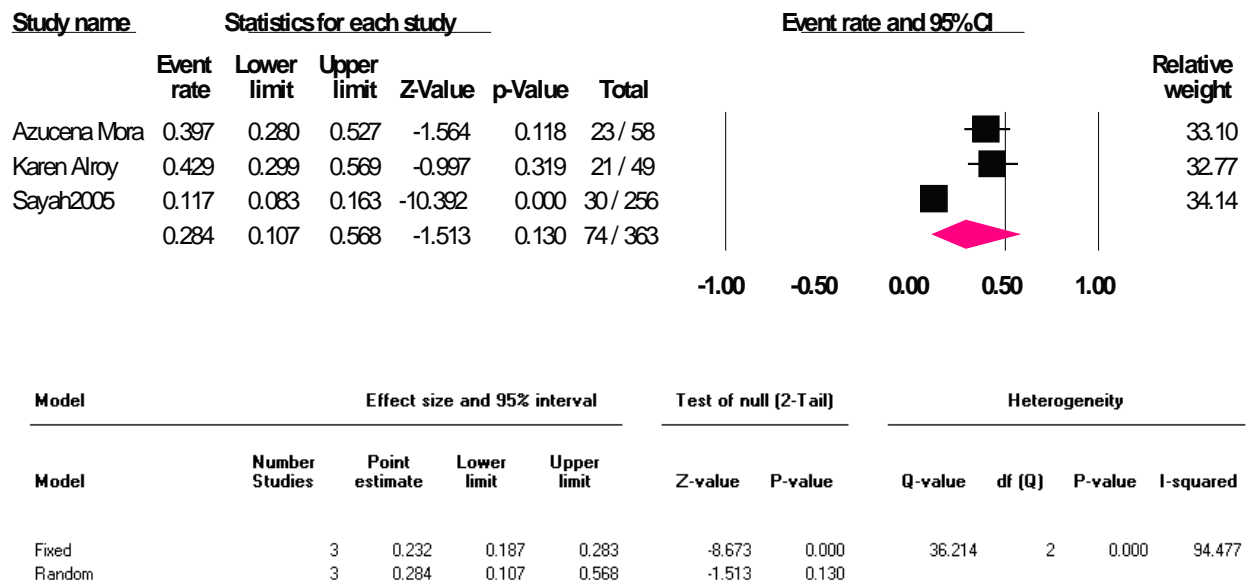

Fig S65. Prevalence of Streptomycin resistance environment/food isolated *E.coli* with Disk Diffusion method.

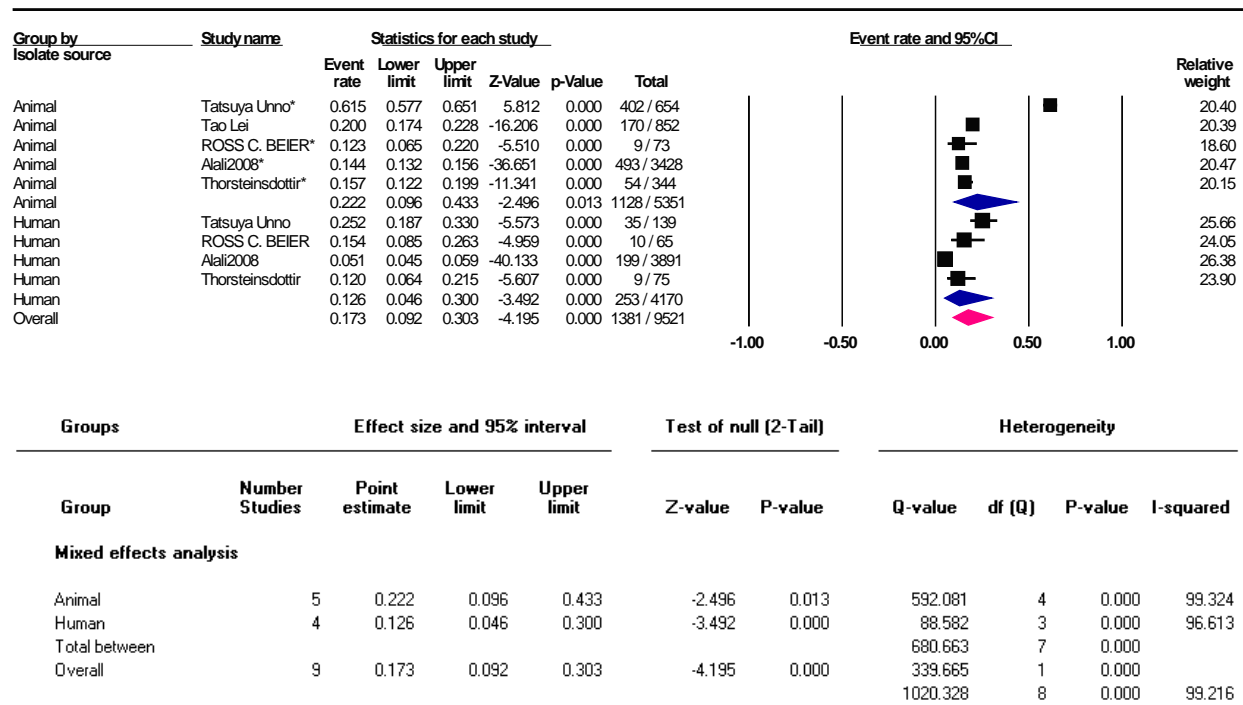

Fig S66. Prevalence of human, animal and environment/food isolated MDR *E.coli* with MIC method.

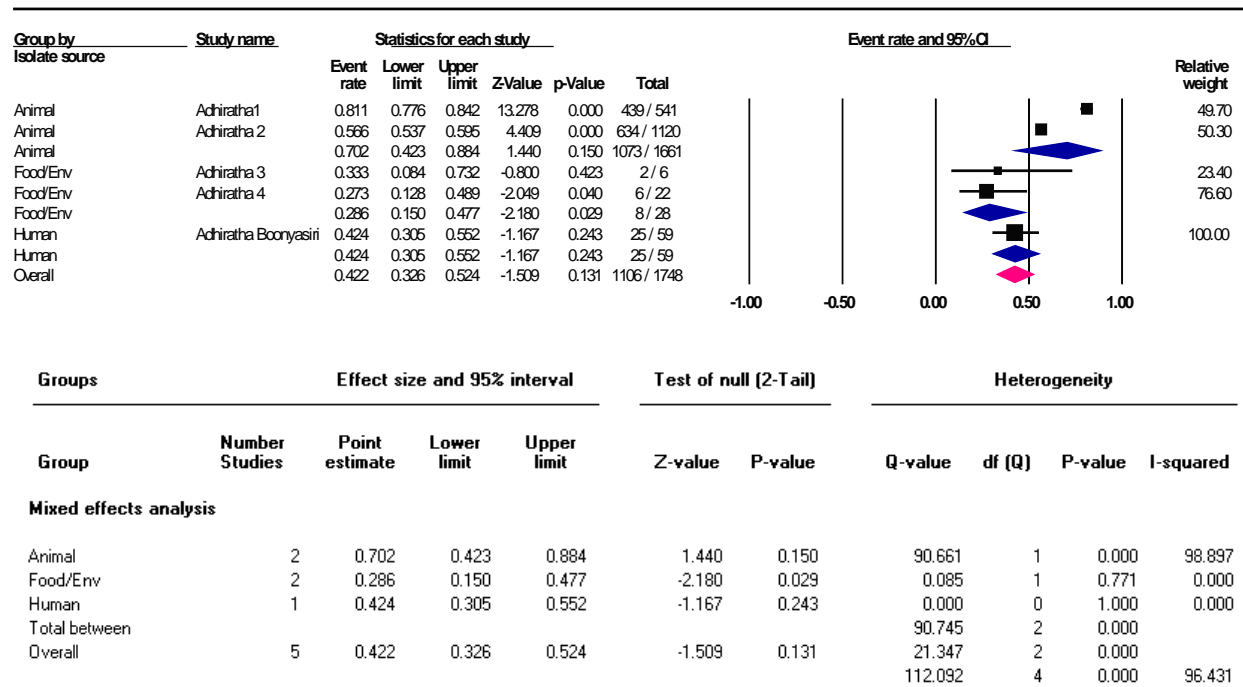

Fig S67. Prevalence of human, animal and environment/food isolated ESBL *E.coli* with MIC method.

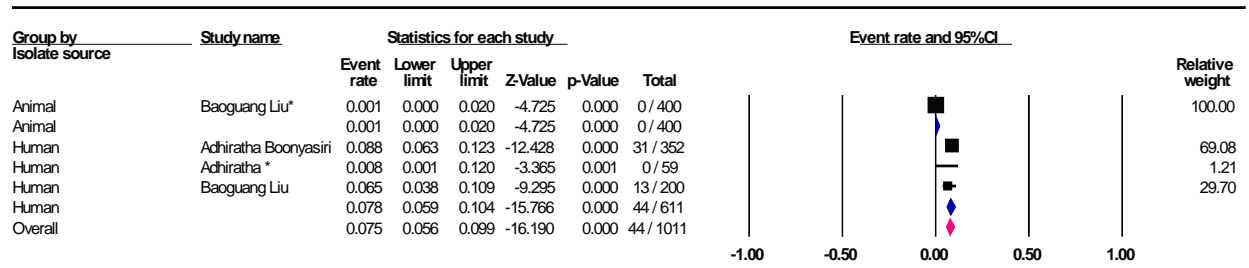

| Groups                       |                | Effect size and 95% interval |             |             | Test of null (2-Tail) |         | Heterogeneity |        |         |           |
|------------------------------|----------------|------------------------------|-------------|-------------|-----------------------|---------|---------------|--------|---------|-----------|
| Group                        | Number Studies | Point estimate               | Lower limit | Upper limit | Z-value               | P-value | Q-value       | df (Q) | P-value | I-squared |
| <b>Fixed effect analysis</b> |                |                              |             |             |                       |         |               |        |         |           |
| Animal                       | 1              | 0.001                        | 0.000       | 0.020       | -4.725                | 0.000   | 0.000         | 0      | 1.000   | 0.000     |
| Human                        | 3              | 0.078                        | 0.059       | 0.104       | -15.766               | 0.000   | 3.607         | 2      | 0.165   | 44.552    |
| Total within                 |                |                              |             |             |                       |         | 3.607         | 2      | 0.165   |           |
| Total between                |                |                              |             |             |                       |         | 8.791         | 1      | 0.003   |           |
| Overall                      | 4              | 0.075                        | 0.056       | 0.099       | -16.190               | 0.000   | 12.398        | 3      | 0.006   | 75.802    |

Fig S68. Prevalence of human, animal and environment/food Ciprofloxacin resistance *E. coli* isolation with MIC method.

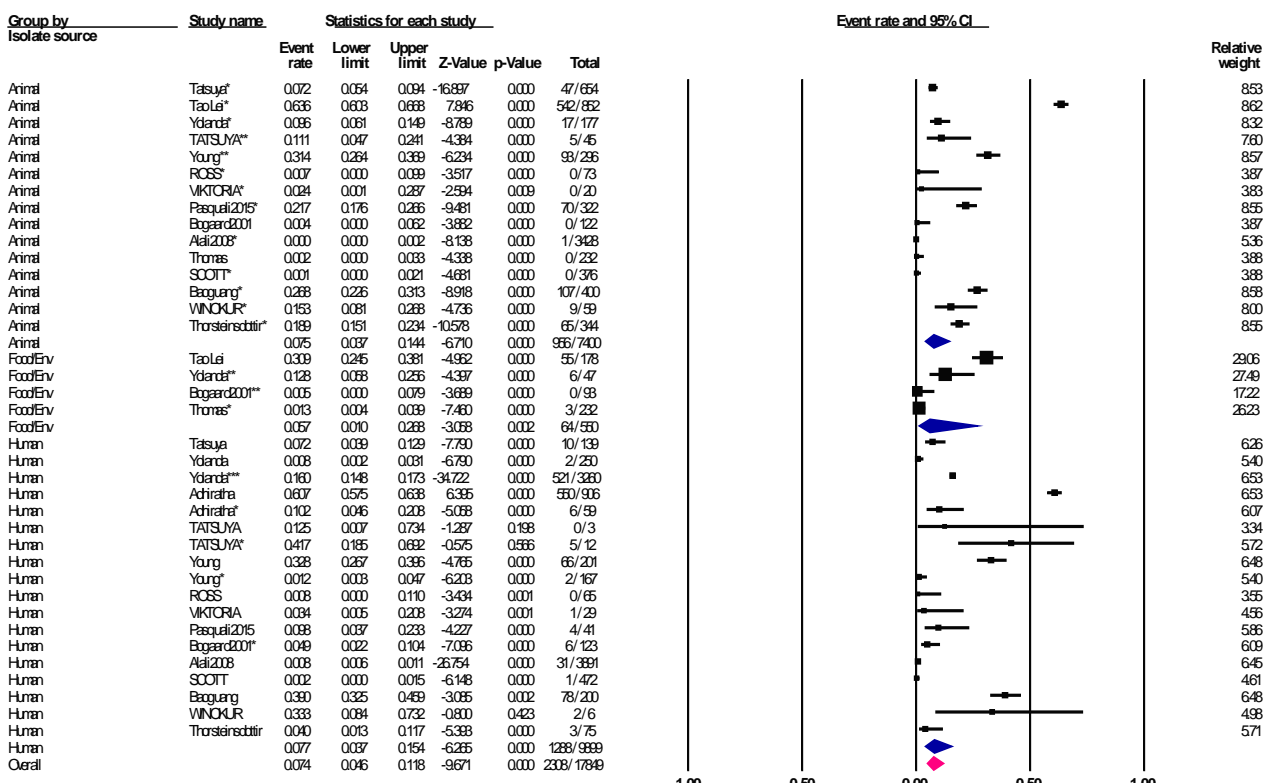

| Groups                        | Effect size and 95% interval |                |             |             | Test of null (2-Tail) |         | Heterogeneity |        |         |           |
|-------------------------------|------------------------------|----------------|-------------|-------------|-----------------------|---------|---------------|--------|---------|-----------|
| Group                         | Number Studies               | Point estimate | Lower limit | Upper limit | Z-value               | P-value | Q-value       | df (Q) | P-value | I-squared |
| <b>Mixed effects analysis</b> |                              |                |             |             |                       |         |               |        |         |           |
| Animal                        | 15                           | 0.075          | 0.037       | 0.144       | -6.710                | 0.000   | 684.950       | 14     | 0.000   | 97.956    |
| Food/Env                      | 4                            | 0.057          | 0.010       | 0.268       | -3.058                | 0.002   | 45.848        | 3      | 0.000   | 93.457    |
| Human                         | 18                           | 0.077          | 0.037       | 0.154       | -6.265                | 0.000   | 1249.401      | 17     | 0.000   | 98.639    |
| Total between                 |                              |                |             |             |                       |         | 1980.199      | 34     | 0.000   |           |
| Overall                       | 37                           | 0.074          | 0.046       | 0.118       | -9.671                | 0.000   | 72.038        | 2      | 0.000   |           |
|                               |                              |                |             |             |                       |         | 2052.237      | 36     | 0.000   | 98.246    |

Fig S69. Prevalence of human, animal and environment/food Ciprofloxacin resistance *E.coli* isolation with MIC method.

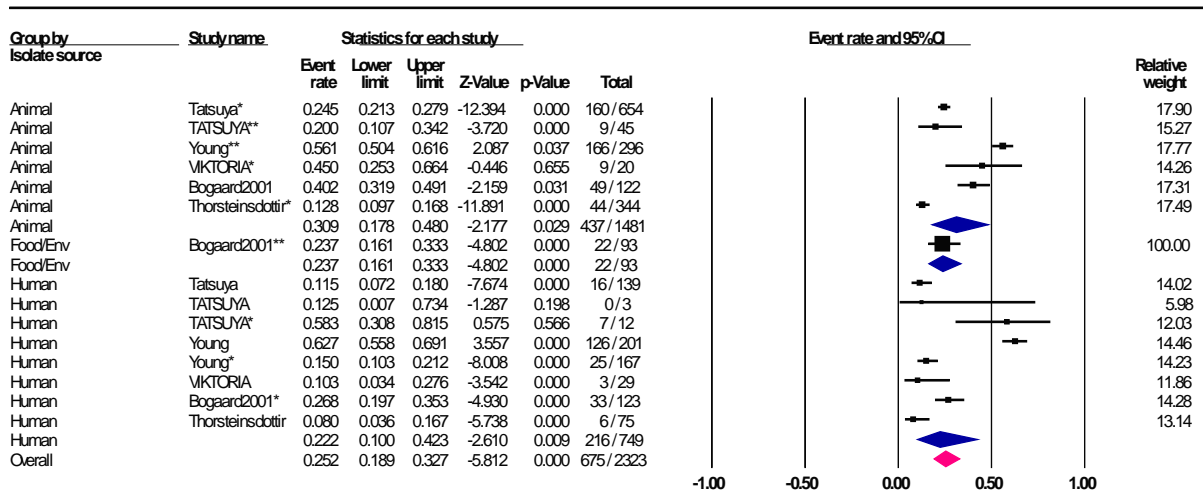

| Groups                        | Effect size and 95% interval |                |             |             | Test of null (2-Tail) |         | Heterogeneity |        |         |           |
|-------------------------------|------------------------------|----------------|-------------|-------------|-----------------------|---------|---------------|--------|---------|-----------|
| Group                         | Number Studies               | Point estimate | Lower limit | Upper limit | Z-value               | P-value | Q-value       | df (Q) | P-value | I-squared |
| <b>Mixed effects analysis</b> |                              |                |             |             |                       |         |               |        |         |           |
| Animal                        | 6                            | 0.309          | 0.178       | 0.480       | -2.177                | 0.029   | 149.495       | 5      | 0.000   | 96.655    |
| Food/Env                      | 1                            | 0.237          | 0.161       | 0.333       | -4.802                | 0.000   | 0.000         | 0      | 1.000   | 0.000     |
| Human                         | 8                            | 0.222          | 0.100       | 0.423       | -2.610                | 0.009   | 146.587       | 7      | 0.000   | 95.225    |
| Total between                 |                              |                |             |             |                       |         | 296.082       | 12     | 0.000   |           |
| Overall                       | 15                           | 0.252          | 0.189       | 0.327       | -5.812                | 0.000   | 3.040         | 2      | 0.219   |           |
|                               |                              |                |             |             |                       |         | 299.122       | 14     | 0.000   | 95.320    |

Fig S70. Prevalence of human, animal and environment/food trimethoprim resistance *E. coli* isolation with MIC method.

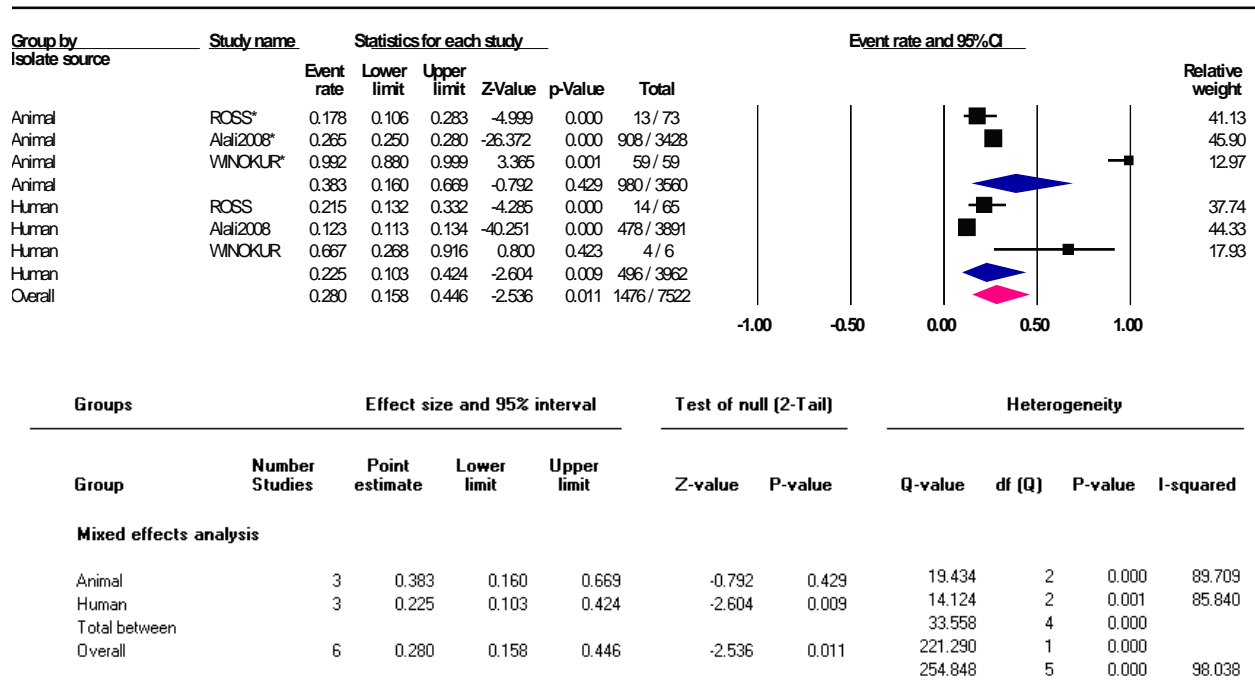

Fig S71. Prevalence of human, animal and environment/food Sulfisoxazole resistance *E.coli* isolation with MIC method.



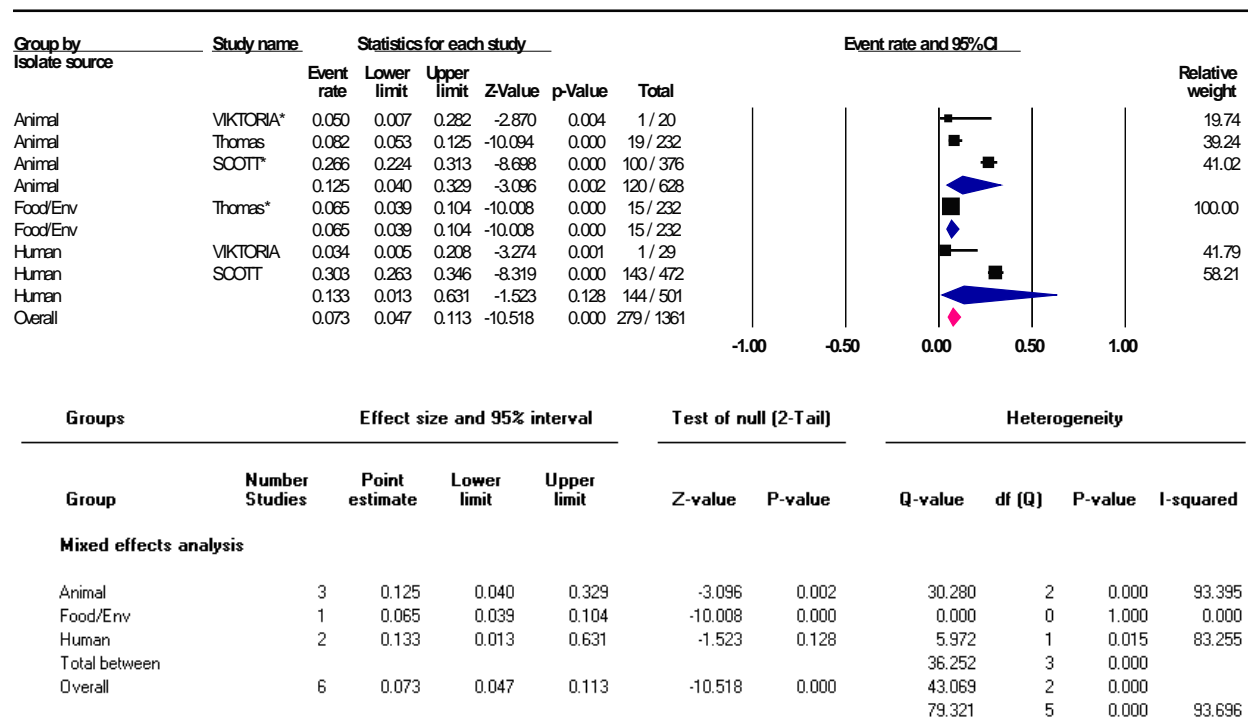

Fig S72. Prevalence of human, animal and environment/food Cephalothin resistance *E.coli* isolation with MIC method.

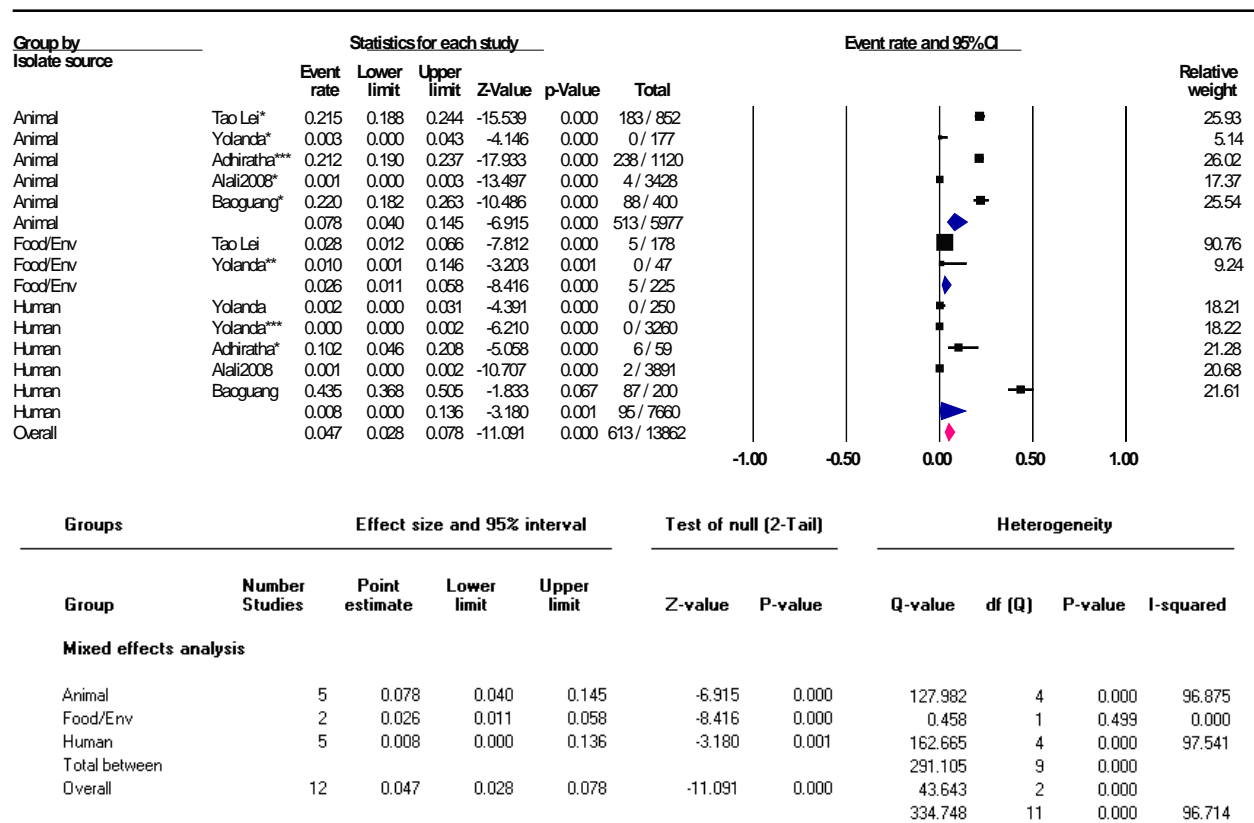

Fig S73. Prevalence of human, animal and environment/food Amikacin resistance *E.coli* isolation with MIC method.

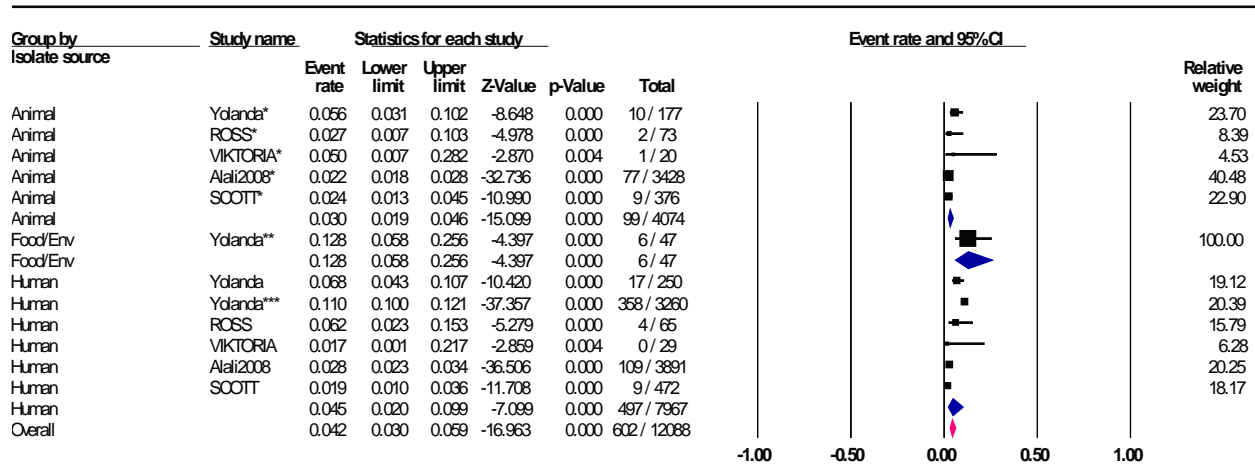

| Groups                        | Effect size and 95% interval |                |                |             | Test of null (2-Tail) |         | Heterogeneity |         |        |         |           |
|-------------------------------|------------------------------|----------------|----------------|-------------|-----------------------|---------|---------------|---------|--------|---------|-----------|
|                               | Group                        | Number Studies | Point estimate | Lower limit | Upper limit           | Z-value | P-value       | Q-value | df (Q) | P-value | I-squared |
| <b>Mixed effects analysis</b> |                              |                |                |             |                       |         |               |         |        |         |           |
| Animal                        | 5                            | 0.030          | 0.019          | 0.046       | -15.099               | 0.000   | 8.218         | 4       | 0.084  | 51.324  |           |
| Food/Env                      | 1                            | 0.128          | 0.058          | 0.256       | -4.397                | 0.000   | 0.000         | 0       | 1.000  | 0.000   |           |
| Human                         | 6                            | 0.045          | 0.020          | 0.099       | -7.099                | 0.000   | 188.888       | 5       | 0.000  | 97.353  |           |
| Total between                 |                              |                |                |             |                       |         | 197.105       | 9       | 0.000  |         |           |
| Overall                       | 12                           | 0.042          | 0.030          | 0.059       | -16.963               | 0.000   | 111.437       | 2       | 0.000  |         |           |
|                               |                              |                |                |             |                       |         | 308.542       | 11      | 0.000  | 96.435  |           |

Fig S74. Prevalence of human, animal and environment/food Amoxicillin/Clavulanic acid resistance *E.coli* isolation with MIC method.

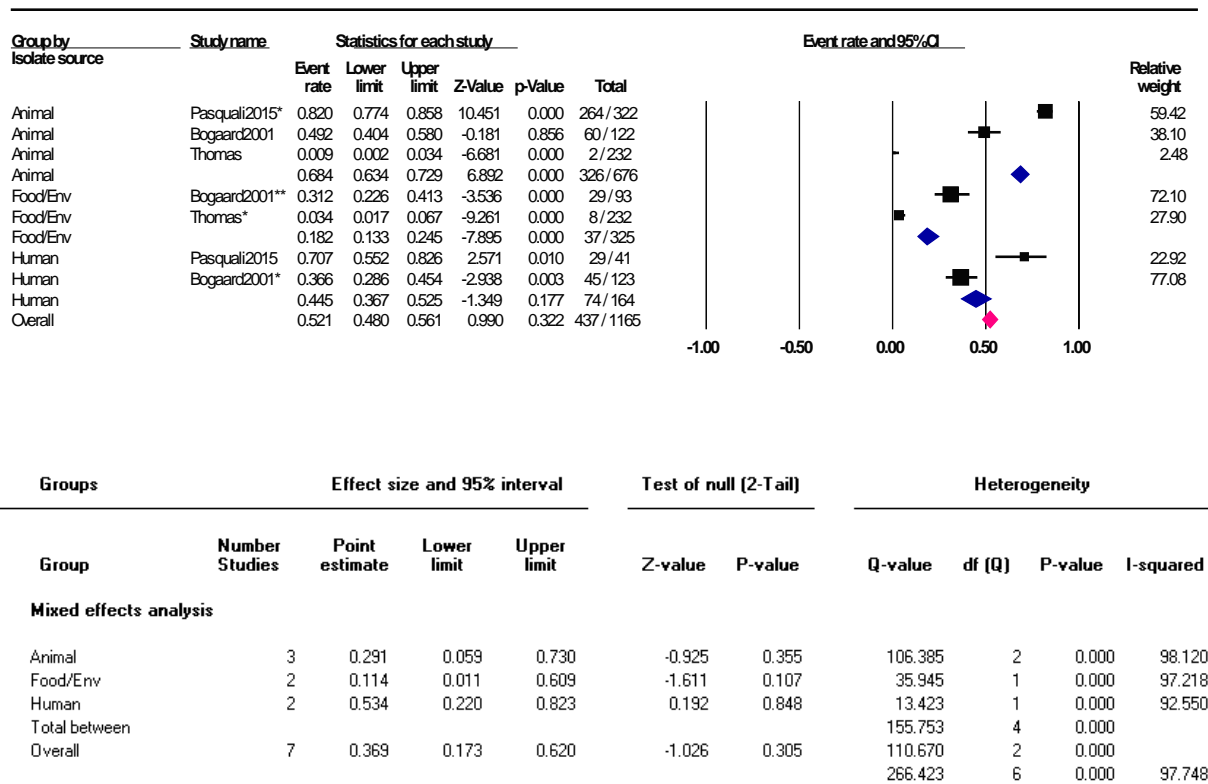

Fig S75. Prevalence of human, animal and environment/food Amoxicillin resistance *E.coli* isolation with MIC method.

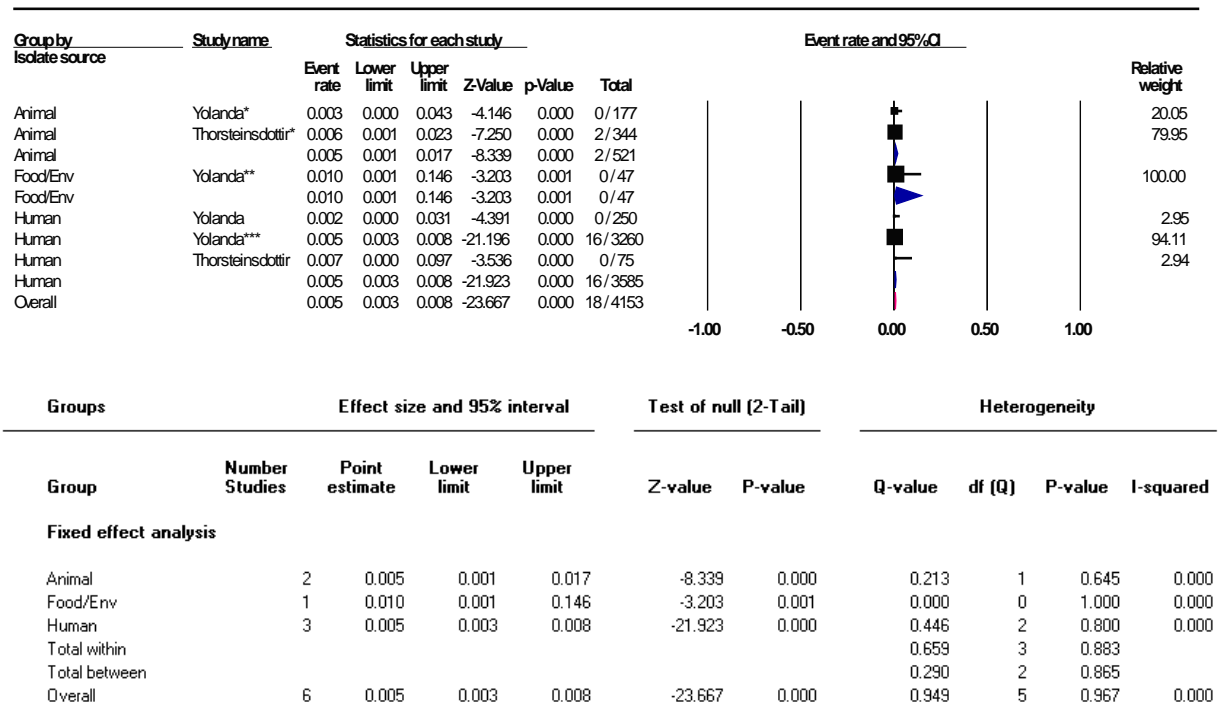

Fig S76. Prevalence of human, animal and environment/food Cefotaxim resistance *E.coli* isolation with MIC method.

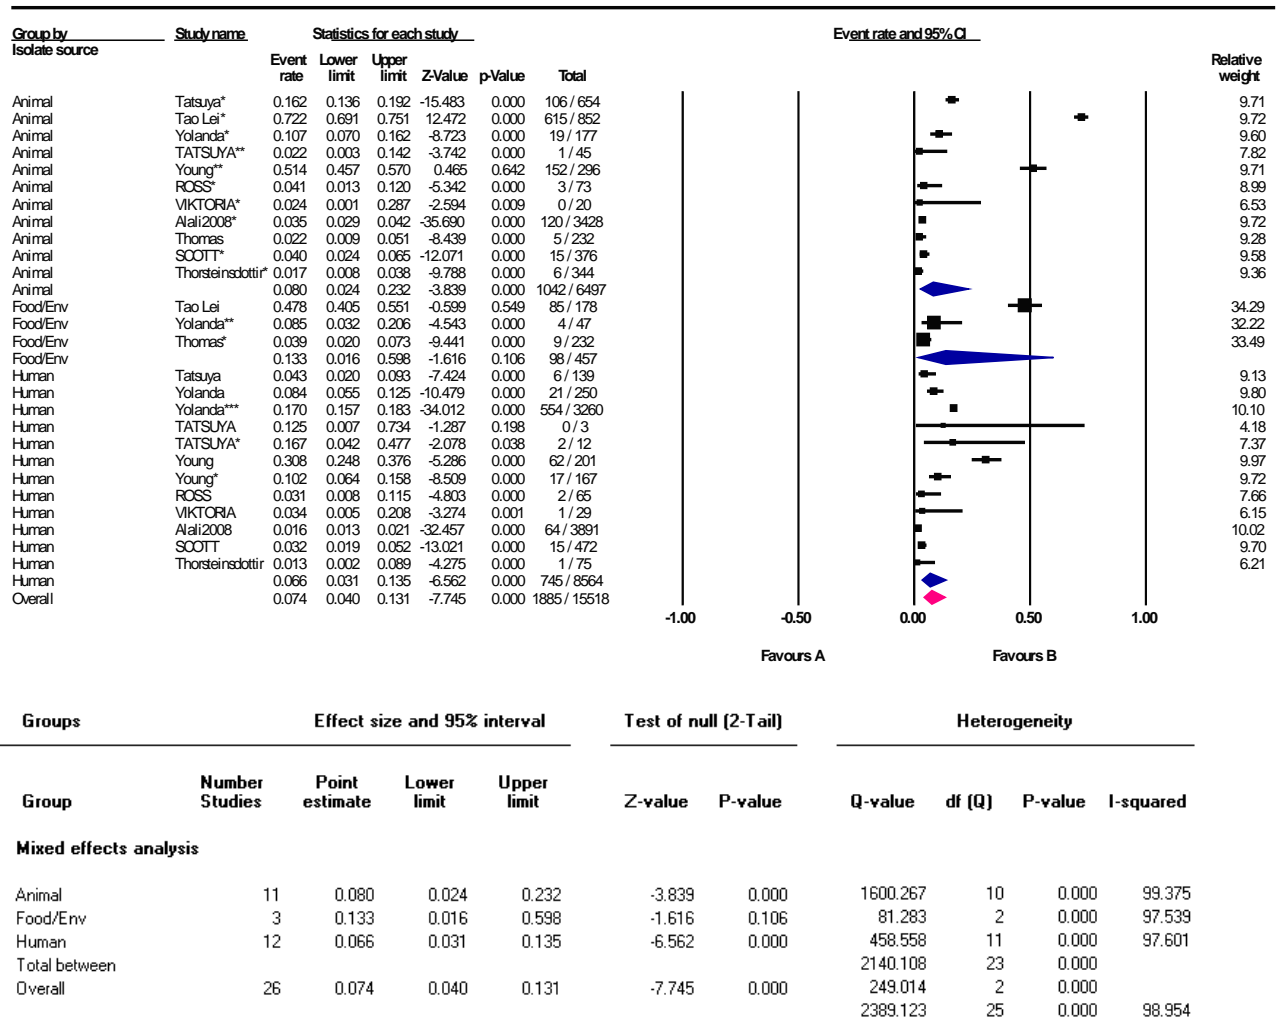

Fig S77. Prevalence of human, animal and environment/food Chloramphenicol resistance *E.coli* isolation with MIC method.

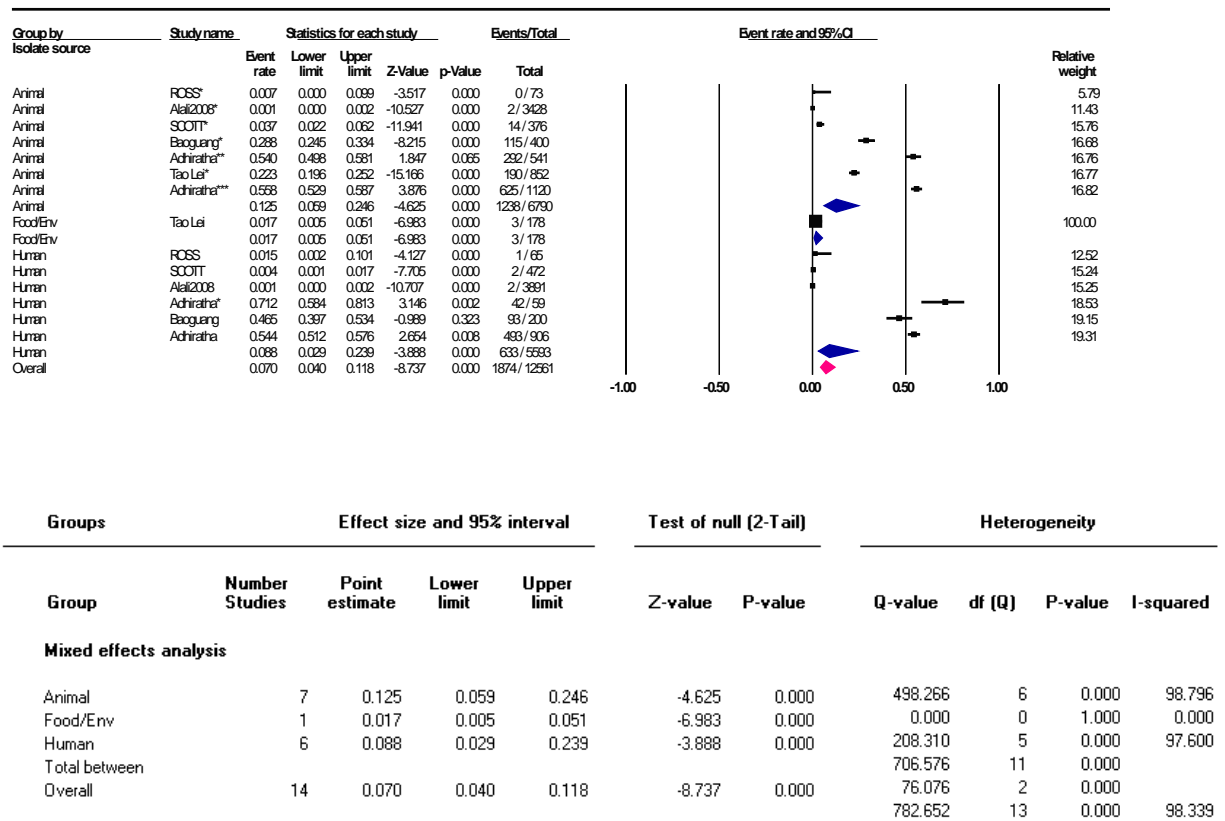

Fig S78. Prevalence of human, animal and environment/food Ceftriaxone resistance *E.coli* isolation with MIC method.

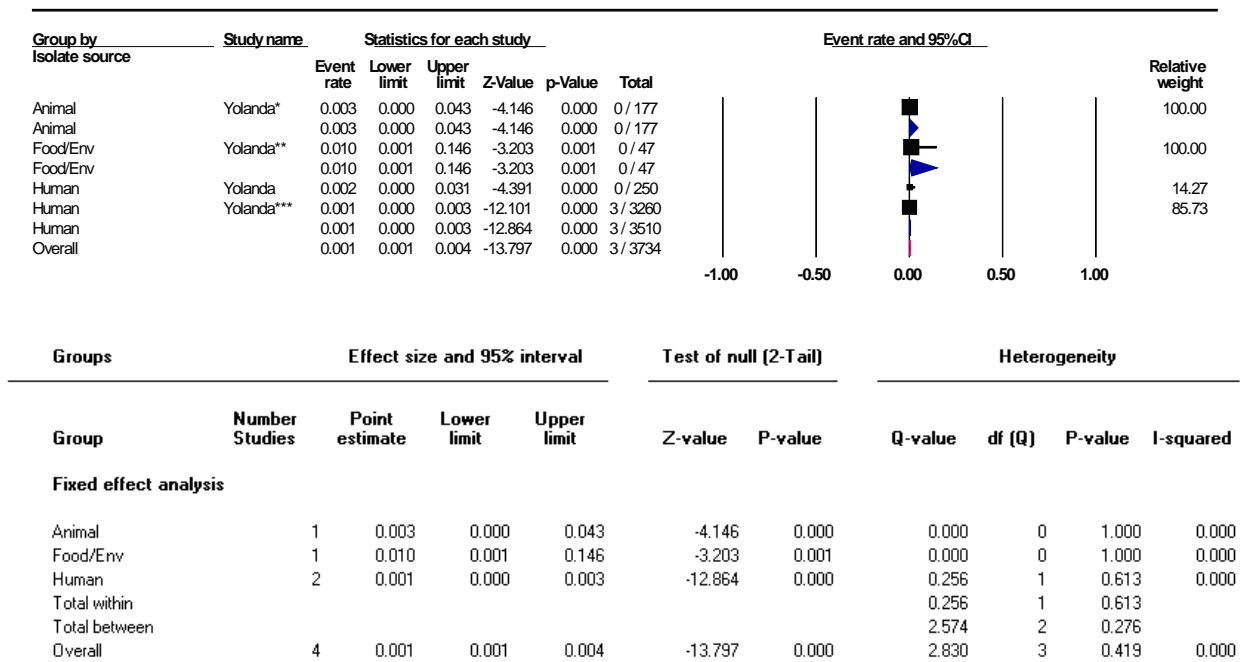

Fig S79. Prevalence of human, animal and environment/food Imipenem resistance *E.coli* isolation with MIC method.



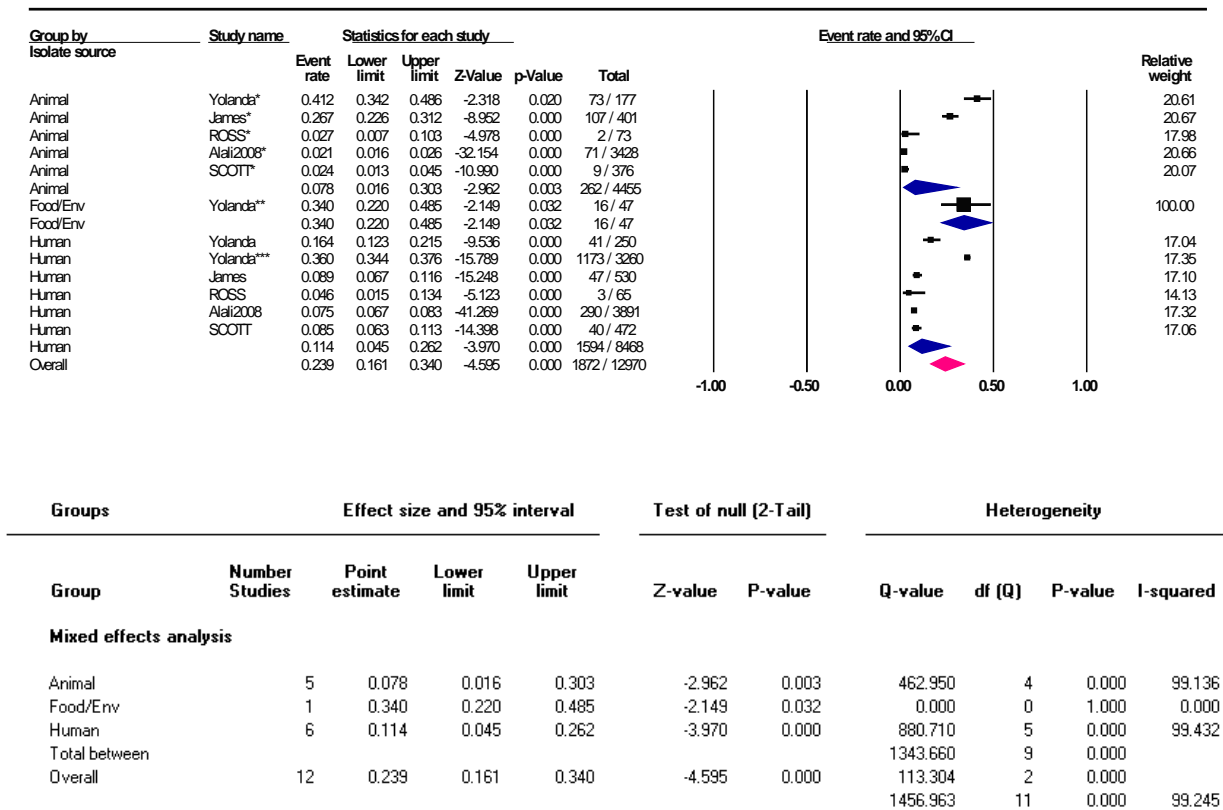

Fig S80. Prevalence of human, animal and environment/food Trimethoprim/sulfamethoxazole resistance *E.coli* isolation with MIC method.

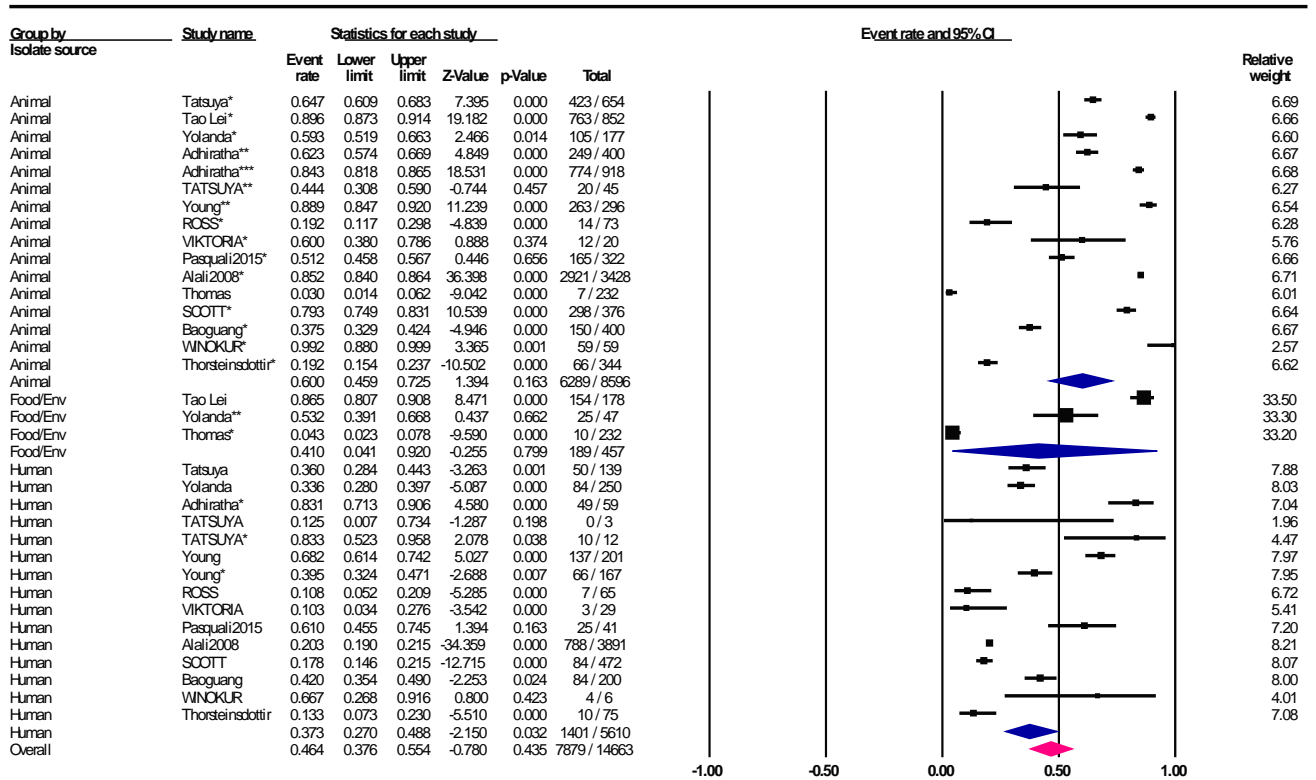

| Groups                        | Effect size and 95% interval |                |                |             | Test of null (2-Tail) |         | Heterogeneity |         |        |         |           |
|-------------------------------|------------------------------|----------------|----------------|-------------|-----------------------|---------|---------------|---------|--------|---------|-----------|
|                               | Group                        | Number Studies | Point estimate | Lower limit | Upper limit           | Z-value | P-value       | Q-value | df (Q) | P-value | I-squared |
| <b>Mixed effects analysis</b> |                              |                |                |             |                       |         |               |         |        |         |           |
| Animal                        | 16                           | 0.600          | 0.459          | 0.725       | 1.394                 | 0.163   | 1341.805      | 15      | 0.000  | 98.882  |           |
| Food/Env                      | 3                            | 0.410          | 0.041          | 0.920       | -0.255                | 0.799   | 161.317       | 2       | 0.000  | 98.760  |           |
| Human                         | 15                           | 0.373          | 0.270          | 0.488       | -2.150                | 0.032   | 390.660       | 14      | 0.000  | 96.416  |           |
| Total between                 |                              |                |                |             |                       |         | 1893.783      | 31      | 0.000  |         |           |
| Overall                       | 34                           | 0.464          | 0.376          | 0.554       | -0.780                | 0.435   | 2371.389      | 2       | 0.000  |         |           |
|                               |                              |                |                |             |                       |         | 4265.172      | 33      | 0.000  | 99.226  |           |

Fig S81. Prevalence of human, animal and environment/food Tetracycline resistance *E.coli* isolation with MIC method.

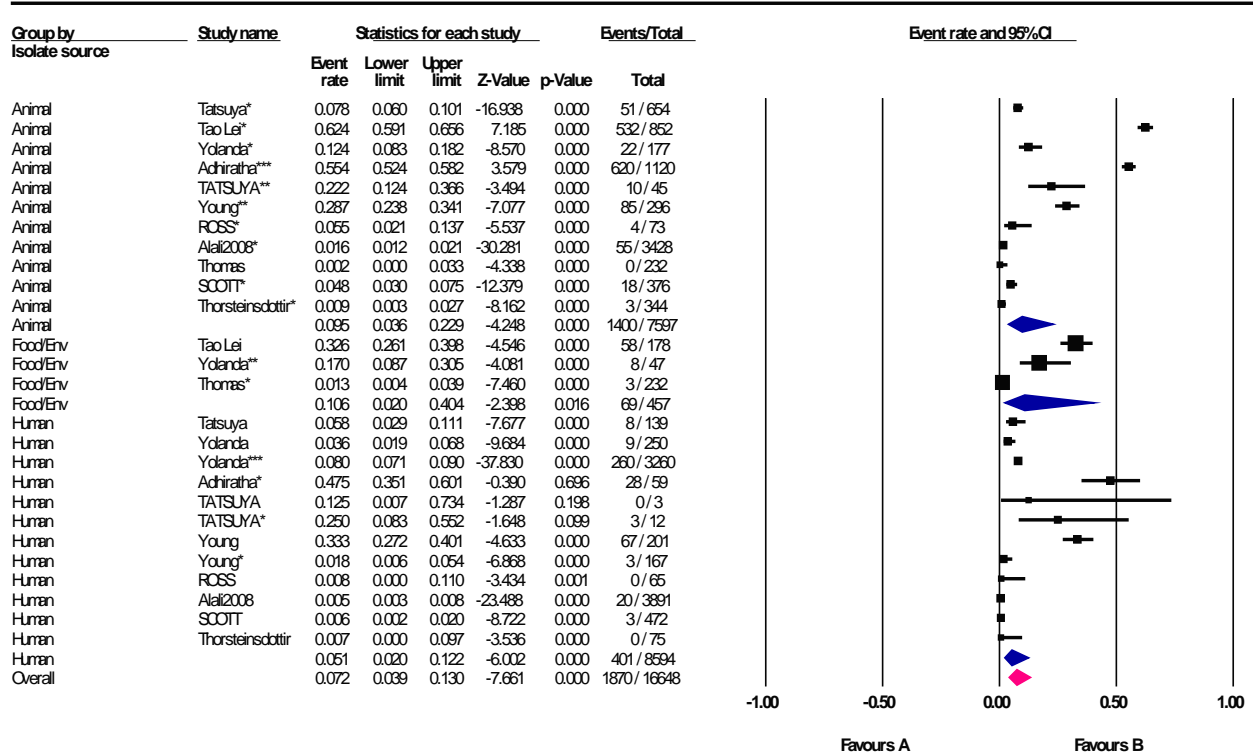

| Groups                        | Effect size and 95% interval |                |             |             | Test of null (2-Tail) |         | Heterogeneity |        |         |           |
|-------------------------------|------------------------------|----------------|-------------|-------------|-----------------------|---------|---------------|--------|---------|-----------|
| Group                         | Number Studies               | Point estimate | Lower limit | Upper limit | Z-value               | P-value | Q-value       | df (Q) | P-value | I-squared |
| <b>Mixed effects analysis</b> |                              |                |             |             |                       |         |               |        |         |           |
| Animal                        | 11                           | 0.095          | 0.036       | 0.229       | -4.248                | 0.000   | 1486.079      | 10     | 0.000   | 99.327    |
| Food/Env                      | 3                            | 0.106          | 0.020       | 0.404       | -2.398                | 0.016   | 37.921        | 2      | 0.000   | 94.726    |
| Human                         | 12                           | 0.051          | 0.020       | 0.122       | -6.002                | 0.000   | 417.502       | 11     | 0.000   | 97.365    |
| Total between                 |                              |                |             |             |                       |         | 1941.501      | 23     | 0.000   |           |
| Overall                       | 26                           | 0.072          | 0.039       | 0.130       | -7.661                | 0.000   | 763.220       | 2      | 0.000   |           |
|                               |                              |                |             |             |                       |         | 2704.721      | 25     | 0.000   | 99.076    |

Fig S82. Prevalence of human, animal and environment/food Gentamicin resistance *E.coli* isolation with MIC method.

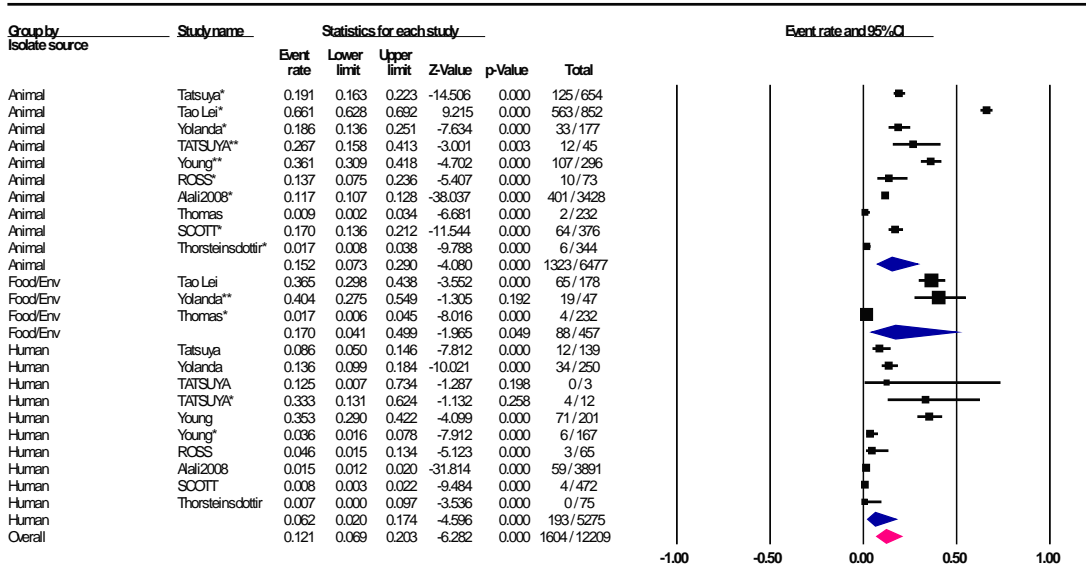

| Groups                        | Effect size and 95% interval |                |             |             | Test of null (2-Tail) |         | Heterogeneity |        |         |           |
|-------------------------------|------------------------------|----------------|-------------|-------------|-----------------------|---------|---------------|--------|---------|-----------|
|                               | Number Studies               | Point estimate | Lower limit | Upper limit | Z-value               | P-value | Q-value       | df (Q) | P-value | I-squared |
| <b>Mixed effects analysis</b> |                              |                |             |             |                       |         |               |        |         |           |
| Animal                        | 10                           | 0.152          | 0.073       | 0.290       | -4.080                | 0.000   | 1022.457      | 9      | 0.000   | 99.120    |
| Food/Env                      | 3                            | 0.170          | 0.041       | 0.499       | -1.965                | 0.049   | 45.706        | 2      | 0.000   | 95.624    |
| Human                         | 10                           | 0.062          | 0.020       | 0.174       | -4.596                | 0.000   | 377.033       | 9      | 0.000   | 97.613    |
| Total between                 |                              |                |             |             |                       |         | 1445.197      | 20     | 0.000   |           |
| Overall                       | 23                           | 0.121          | 0.069       | 0.203       | -6.282                | 0.000   | 261.830       | 2      | 0.000   |           |
|                               |                              |                |             |             |                       |         | 1707.027      | 22     | 0.000   | 98.711    |

Fig S83. Prevalence of human, animal and environment/food Kanamycin resistance *E.coli* isolation with MIC method.

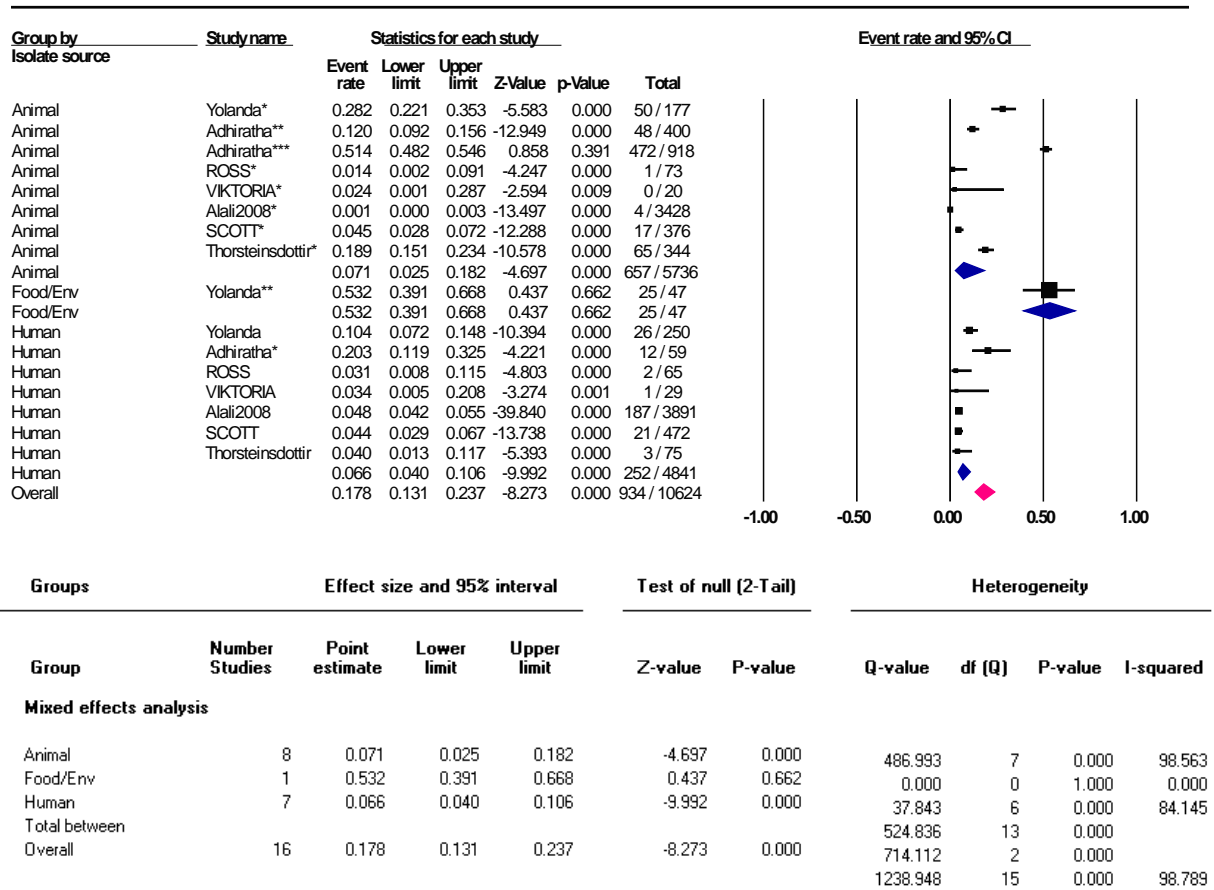

Fig S84. Prevalence of human, animal and environment/food Nalidixic acid resistance *E.coli* isolation with MIC method.

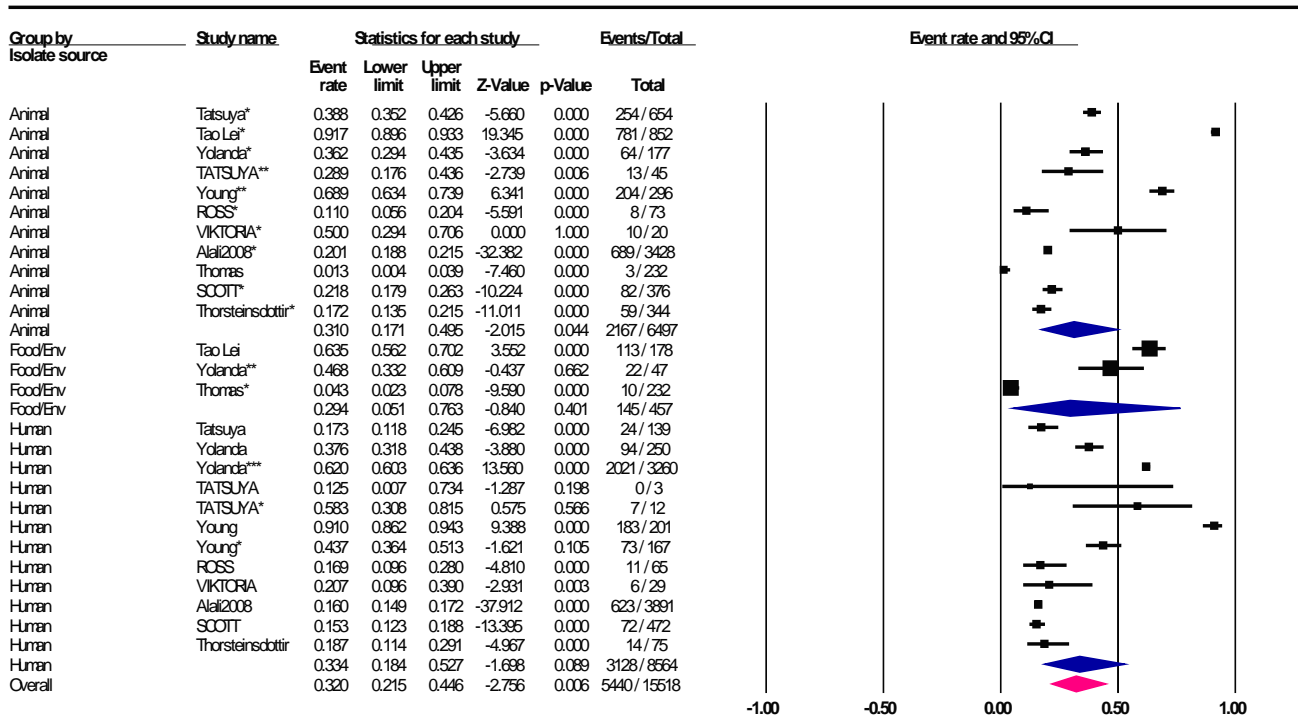

| Groups                        | Effect size and 95% interval |                |             |             | Test of null (2-Tail) |         | Heterogeneity |        |         |           |
|-------------------------------|------------------------------|----------------|-------------|-------------|-----------------------|---------|---------------|--------|---------|-----------|
| Group                         | Number Studies               | Point estimate | Lower limit | Upper limit | Z-value               | P-value | Q-value       | df (Q) | P-value | I-squared |
| <b>Mixed effects analysis</b> |                              |                |             |             |                       |         |               |        |         |           |
| Animal                        | 11                           | 0.310          | 0.171       | 0.495       | -2.015                | 0.044   | 1128.362      | 10     | 0.000   | 99.114    |
| Food/Env                      | 3                            | 0.294          | 0.051       | 0.763       | -0.840                | 0.401   | 103.661       | 2      | 0.000   | 98.071    |
| Human                         | 12                           | 0.334          | 0.184       | 0.527       | -1.698                | 0.089   | 1720.487      | 11     | 0.000   | 99.361    |
| Total between                 |                              |                |             |             |                       |         | 2952.510      | 23     | 0.000   |           |
| Overall                       | 26                           | 0.320          | 0.215       | 0.446       | -2.756                | 0.006   | 106.372       | 2      | 0.000   |           |
|                               |                              |                |             |             |                       |         | 3058.882      | 25     | 0.000   | 99.183    |

Fig S85. Prevalence of human, animal and environment/food Ampicillinresistance *E.coli* isolation with MIC method.

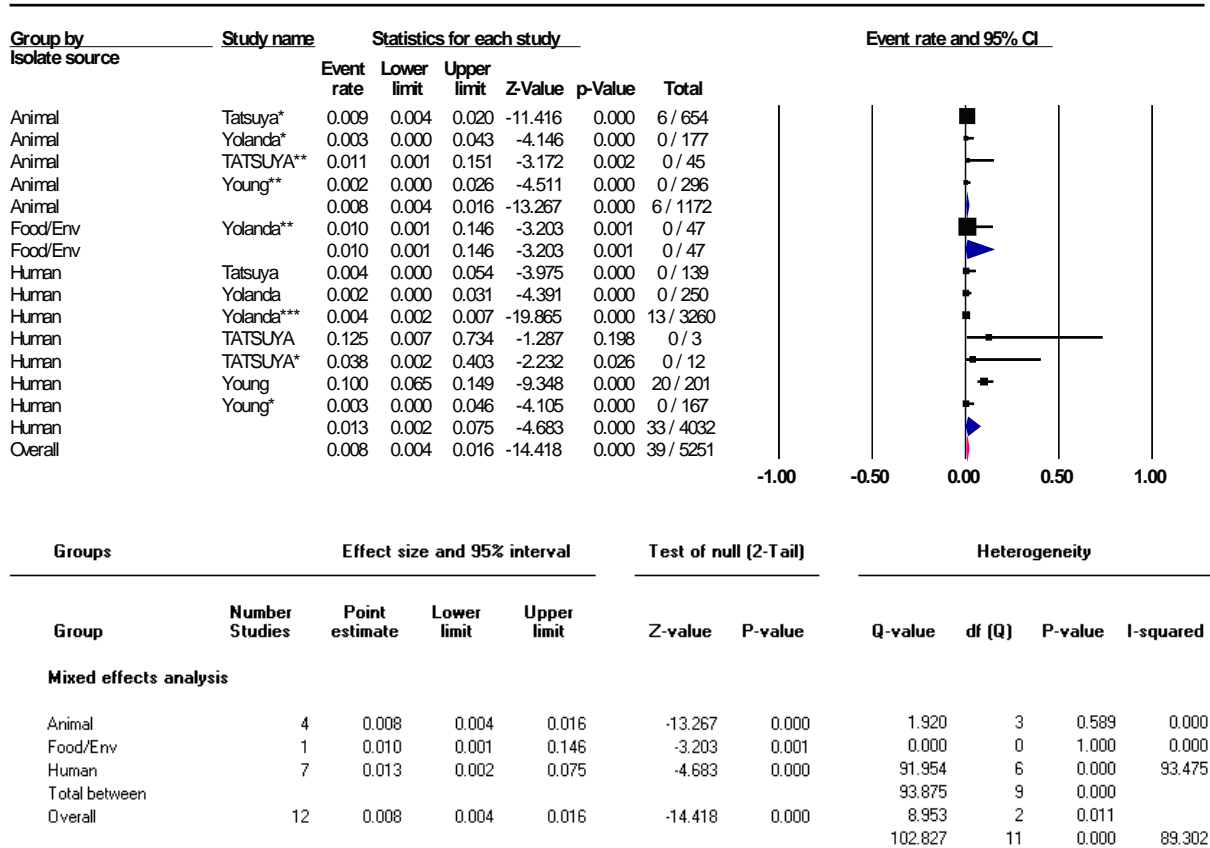

Fig S86. Prevalence of human, animal and environment/food Ceftazidim resistance *E.coli* isolation with MIC method.

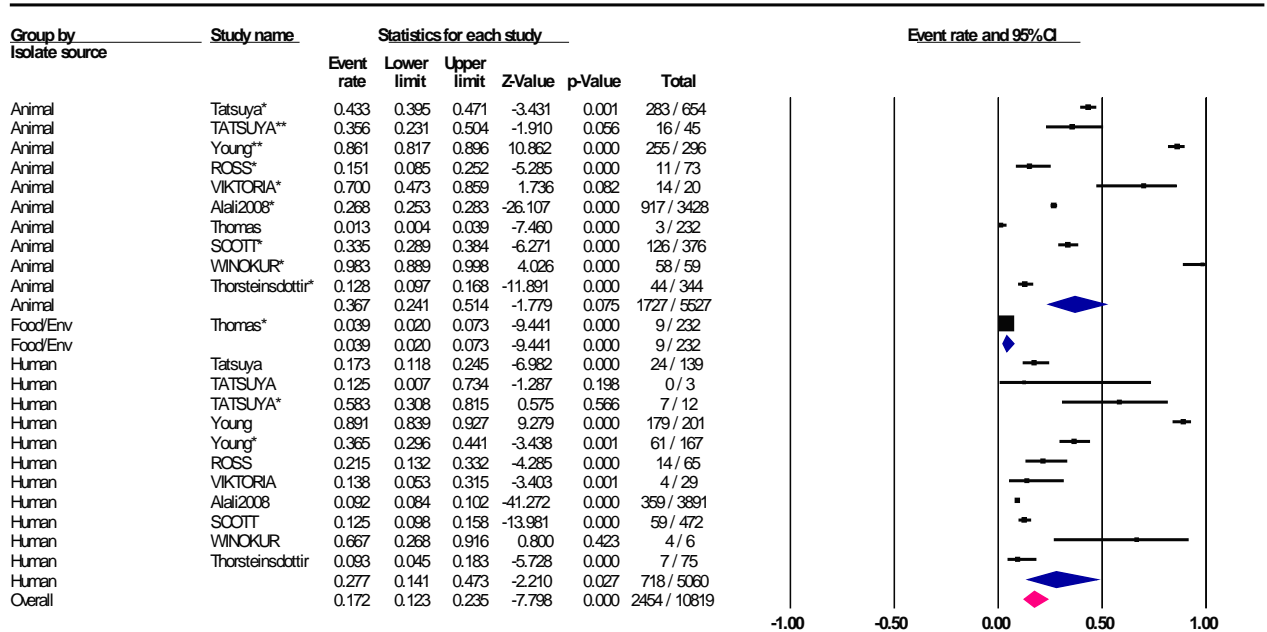

| Groups                        | Effect size and 95% interval |                |             |             | Test of null (2-Tail) |         | Heterogeneity |        |         |           |
|-------------------------------|------------------------------|----------------|-------------|-------------|-----------------------|---------|---------------|--------|---------|-----------|
| Group                         | Number Studies               | Point estimate | Lower limit | Upper limit | Z-value               | P-value | Q-value       | df (Q) | P-value | I-squared |
| <b>Mixed effects analysis</b> |                              |                |             |             |                       |         |               |        |         |           |
| Animal                        | 10                           | 0.367          | 0.241       | 0.514       | -1.779                | 0.075   | 447.055       | 9      | 0.000   | 97.987    |
| Food/Env                      | 1                            | 0.039          | 0.020       | 0.073       | -9.441                | 0.000   | 0.000         | 0      | 1.000   | 0.000     |
| Human                         | 11                           | 0.277          | 0.141       | 0.473       | -2.210                | 0.027   | 461.515       | 10     | 0.000   | 97.833    |
| Total between                 |                              |                |             |             |                       |         | 908.570       | 19     | 0.000   |           |
| Overall                       | 22                           | 0.172          | 0.123       | 0.235       | -7.798                | 0.000   | 398.031       | 2      | 0.000   |           |
|                               |                              |                |             |             |                       |         | 1306.601      | 21     | 0.000   | 98.393    |

Fig S87. Prevalence of human, animal and environment/food Streptomycin resistance *E.coli* isolation with MIC method.



| Group by<br>published time | Study name        | Statistics for each study |             |             |         |         | Events/Total | Event rate and 95% CI |
|----------------------------|-------------------|---------------------------|-------------|-------------|---------|---------|--------------|-----------------------|
|                            |                   | Event rate                | Lower limit | Upper limit | Z-Value | p-Value |              |                       |
| 2001.00                    | Yolanda           | 0.008                     | 0.002       | 0.031       | -6.790  | 0.000   | 2 / 250      |                       |
| 2001.00                    | Yolanda*          | 0.096                     | 0.061       | 0.149       | -8.789  | 0.000   | 17 / 177     |                       |
| 2001.00                    | Yolanda**         | 0.128                     | 0.058       | 0.256       | -4.397  | 0.000   | 6 / 47       |                       |
| 2001.00                    | Yolanda***        | 0.160                     | 0.148       | 0.173       | -34.722 | 0.000   | 521 / 3260   |                       |
| 2001.00                    | Bogaard2001       | 0.004                     | 0.000       | 0.062       | -3.882  | 0.000   | 0 / 122      |                       |
| 2001.00                    | Bogaard2001*      | 0.049                     | 0.022       | 0.104       | -7.096  | 0.000   | 6 / 123      |                       |
| 2001.00                    | Bogaard2001**     | 0.005                     | 0.000       | 0.079       | -3.689  | 0.000   | 0 / 93       |                       |
| 2001.00                    | WINCKUR           | 0.333                     | 0.084       | 0.732       | -0.800  | 0.423   | 2 / 6        |                       |
| 2001.00                    | WINCKUR*          | 0.153                     | 0.081       | 0.268       | -4.736  | 0.000   | 9 / 59       |                       |
| 2001.00                    |                   | 0.077                     | 0.043       | 0.134       | -7.863  | 0.000   | 563 / 4137   |                       |
| 2005.00                    | Young             | 0.328                     | 0.267       | 0.396       | -4.765  | 0.000   | 66 / 201     |                       |
| 2005.00                    | Young*            | 0.012                     | 0.003       | 0.047       | -6.203  | 0.000   | 2 / 167      |                       |
| 2005.00                    | Young**           | 0.314                     | 0.264       | 0.369       | -6.234  | 0.000   | 93 / 296     |                       |
| 2005.00                    | Thomas            | 0.002                     | 0.000       | 0.033       | -4.338  | 0.000   | 0 / 232      |                       |
| 2005.00                    | Thomas*           | 0.013                     | 0.004       | 0.039       | -7.460  | 0.000   | 3 / 232      |                       |
| 2005.00                    | SCOTT             | 0.002                     | 0.000       | 0.015       | -6.148  | 0.000   | 1 / 472      |                       |
| 2005.00                    | SCOTT*            | 0.001                     | 0.000       | 0.021       | -4.681  | 0.000   | 0 / 376      |                       |
| 2005.00                    |                   | 0.027                     | 0.009       | 0.081       | -6.081  | 0.000   | 165 / 1976   |                       |
| 2008.00                    | Alali2008         | 0.008                     | 0.006       | 0.011       | -26.754 | 0.000   | 31 / 3891    |                       |
| 2008.00                    | Alali2008*        | 0.000                     | 0.000       | 0.002       | -8.138  | 0.000   | 1 / 3428     |                       |
| 2008.00                    | Thorsteinsdottir  | 0.040                     | 0.013       | 0.117       | -5.393  | 0.000   | 3 / 75       |                       |
| 2008.00                    | Thorsteinsdottir* | 0.189                     | 0.151       | 0.234       | -10.578 | 0.000   | 65 / 344     |                       |
| 2008.00                    |                   | 0.014                     | 0.001       | 0.130       | -3.527  | 0.000   | 100 / 7738   |                       |
| 2009.00                    | VIKTORIA          | 0.034                     | 0.005       | 0.208       | -3.274  | 0.001   | 1 / 29       |                       |
| 2009.00                    | VIKTORIA*         | 0.024                     | 0.001       | 0.287       | -2.594  | 0.009   | 0 / 20       |                       |
| 2009.00                    |                   | 0.030                     | 0.006       | 0.138       | -4.172  | 0.000   | 1 / 49       |                       |
| 2010.00                    | Tatsuya           | 0.072                     | 0.039       | 0.129       | -7.790  | 0.000   | 10 / 139     |                       |
| 2010.00                    | Tatsuya*          | 0.072                     | 0.054       | 0.094       | -16.897 | 0.000   | 47 / 654     |                       |
| 2010.00                    | Tao Lei           | 0.309                     | 0.245       | 0.381       | -4.962  | 0.000   | 55 / 178     |                       |
| 2010.00                    | Tao Lei*          | 0.636                     | 0.603       | 0.668       | 7.846   | 0.000   | 542 / 852    |                       |
| 2010.00                    |                   | 0.209                     | 0.046       | 0.591       | -1.534  | 0.125   | 654 / 1823   |                       |
| 2011.00                    | TATSUYA           | 0.125                     | 0.007       | 0.734       | -1.287  | 0.198   | 0 / 3        |                       |
| 2011.00                    | TATSUYA*          | 0.417                     | 0.185       | 0.692       | -0.575  | 0.566   | 5 / 12       |                       |
| 2011.00                    | TATSUYA**         | 0.111                     | 0.047       | 0.241       | -4.384  | 0.000   | 5 / 45       |                       |
| 2011.00                    |                   | 0.204                     | 0.062       | 0.498       | -1.973  | 0.049   | 10 / 60      |                       |
| 2014.00                    | Adhiratha         | 0.607                     | 0.575       | 0.638       | 6.395   | 0.000   | 550 / 906    |                       |
| 2014.00                    | Adhiratha*        | 0.102                     | 0.046       | 0.208       | -5.058  | 0.000   | 6 / 59       |                       |
| 2014.00                    |                   | 0.302                     | 0.032       | 0.849       | -0.641  | 0.522   | 556 / 965    |                       |
| 2015.00                    | Pasquali2015      | 0.098                     | 0.037       | 0.233       | -4.227  | 0.000   | 4 / 41       |                       |
| 2015.00                    | Pasquali2015*     | 0.217                     | 0.176       | 0.266       | -9.481  | 0.000   | 70 / 322     |                       |
| 2015.00                    |                   | 0.166                     | 0.076       | 0.325       | -3.579  | 0.000   | 74 / 363     |                       |
| 2016.00                    | ROSS              | 0.008                     | 0.000       | 0.110       | -3.434  | 0.001   | 0 / 65       |                       |
| 2016.00                    | ROSS*             | 0.007                     | 0.000       | 0.099       | -3.517  | 0.000   | 0 / 73       |                       |
| 2016.00                    |                   | 0.007                     | 0.001       | 0.049       | -4.915  | 0.000   | 0 / 138      |                       |
| 2018.00                    | Baoguang          | 0.390                     | 0.325       | 0.459       | -3.085  | 0.002   | 78 / 200     |                       |
| 2018.00                    | Baoguang*         | 0.268                     | 0.226       | 0.313       | -8.918  | 0.000   | 107 / 400    |                       |
| 2018.00                    |                   | 0.324                     | 0.217       | 0.454       | -2.625  | 0.009   | 185 / 600    |                       |
| Overall                    |                   | 0.134                     | 0.101       | 0.175       | -11.476 | 0.000   | 2308 / 17849 |                       |

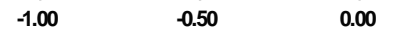

| Groups                        |                | Effect size and 95% interval |             |             | Test of null (2-Tail) |         | Heterogeneity |        |         |
|-------------------------------|----------------|------------------------------|-------------|-------------|-----------------------|---------|---------------|--------|---------|
| Group                         | Number Studies | Point estimate               | Lower limit | Upper limit | Z-value               | P-value | Q-value       | df (Q) | P-value |
| <b>Mixed effects analysis</b> |                |                              |             |             |                       |         |               |        |         |
| 2001.000                      | 9              | 0.077                        | 0.043       | 0.134       | -7.863                | 0.000   | 48.640        | 8      |         |
| 2005.000                      | 7              | 0.027                        | 0.009       | 0.081       | -6.081                | 0.000   | 118.107       | 6      |         |
| 2008.000                      | 4              | 0.014                        | 0.001       | 0.130       | -3.527                | 0.000   | 250.007       | 3      |         |
| 2009.000                      | 2              | 0.030                        | 0.006       | 0.138       | -4.172                | 0.000   | 0.047         | 1      |         |
| 2010.000                      | 4              | 0.209                        | 0.046       | 0.591       | -1.534                | 0.125   | 421.601       | 3      |         |
| 2011.000                      | 3              | 0.204                        | 0.062       | 0.498       | -1.973                | 0.049   | 5.478         | 2      |         |
| 2014.000                      | 2              | 0.302                        | 0.032       | 0.849       | -0.641                | 0.522   | 35.919        | 1      |         |
| 2015.000                      | 2              | 0.166                        | 0.076       | 0.325       | -3.579                | 0.000   | 3.016         | 1      |         |
| 2016.000                      | 2              | 0.007                        | 0.001       | 0.049       | -4.915                | 0.000   | 0.003         | 1      |         |
| 2018.000                      | 2              | 0.324                        | 0.217       | 0.454       | -2.625                | 0.009   | 9.286         | 1      |         |
| Total between                 |                |                              |             |             |                       |         | 892.105       | 27     |         |
| Overall                       | 37             | 0.134                        | 0.101       | 0.175       | -11.476               | 0.000   | 1160.132      | 9      |         |
|                               |                |                              |             |             |                       |         | 2052.237      | 36     |         |

Fig S88. Global prevalence of Ciprofloxacin resistance isolates from 2000 to 2018.

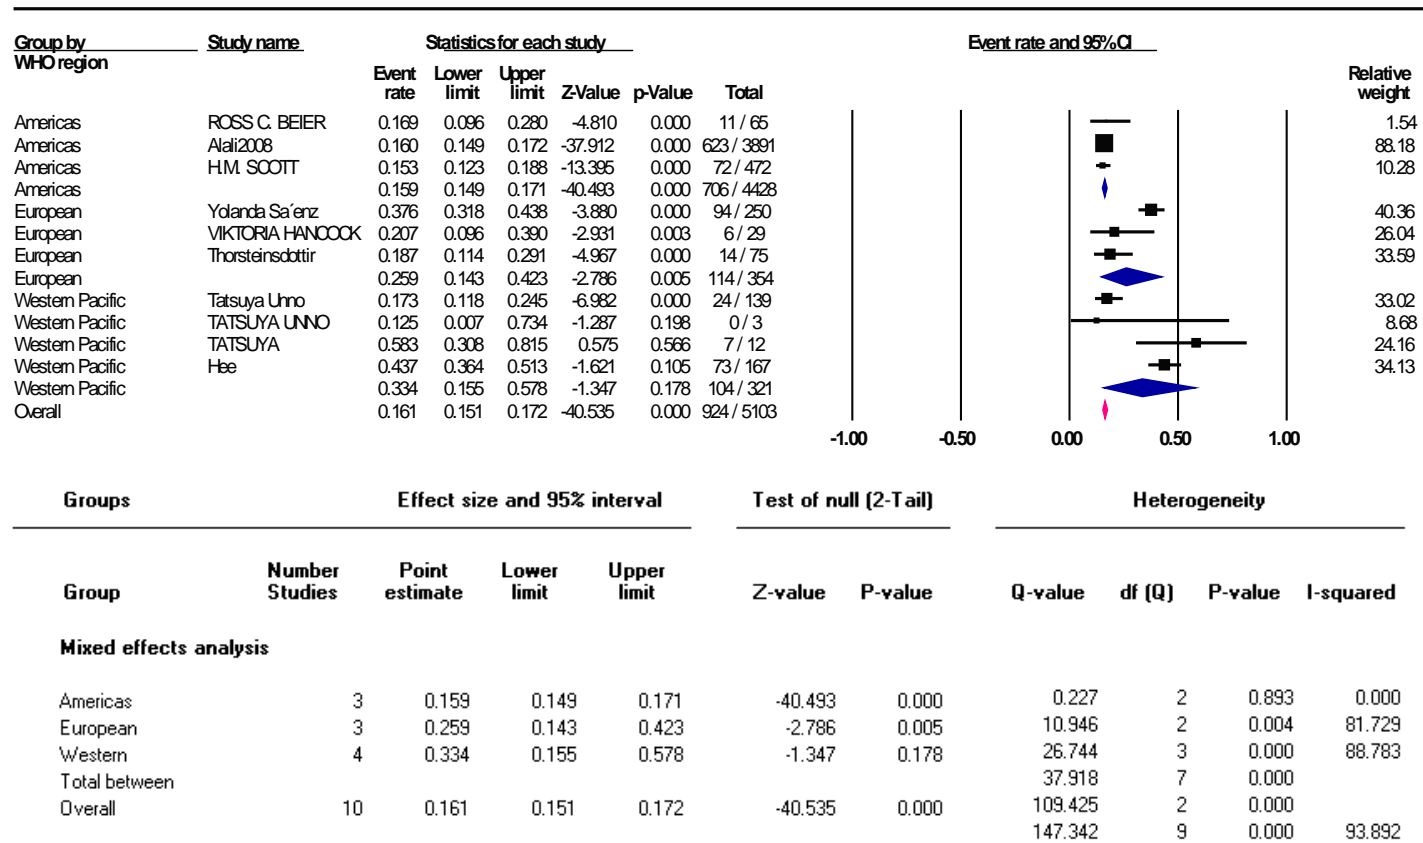

Fig S89 . Global prevalence of Amoxicillin resistance E. coli clinical (human) isolates in WHO regional offices with MIC method.

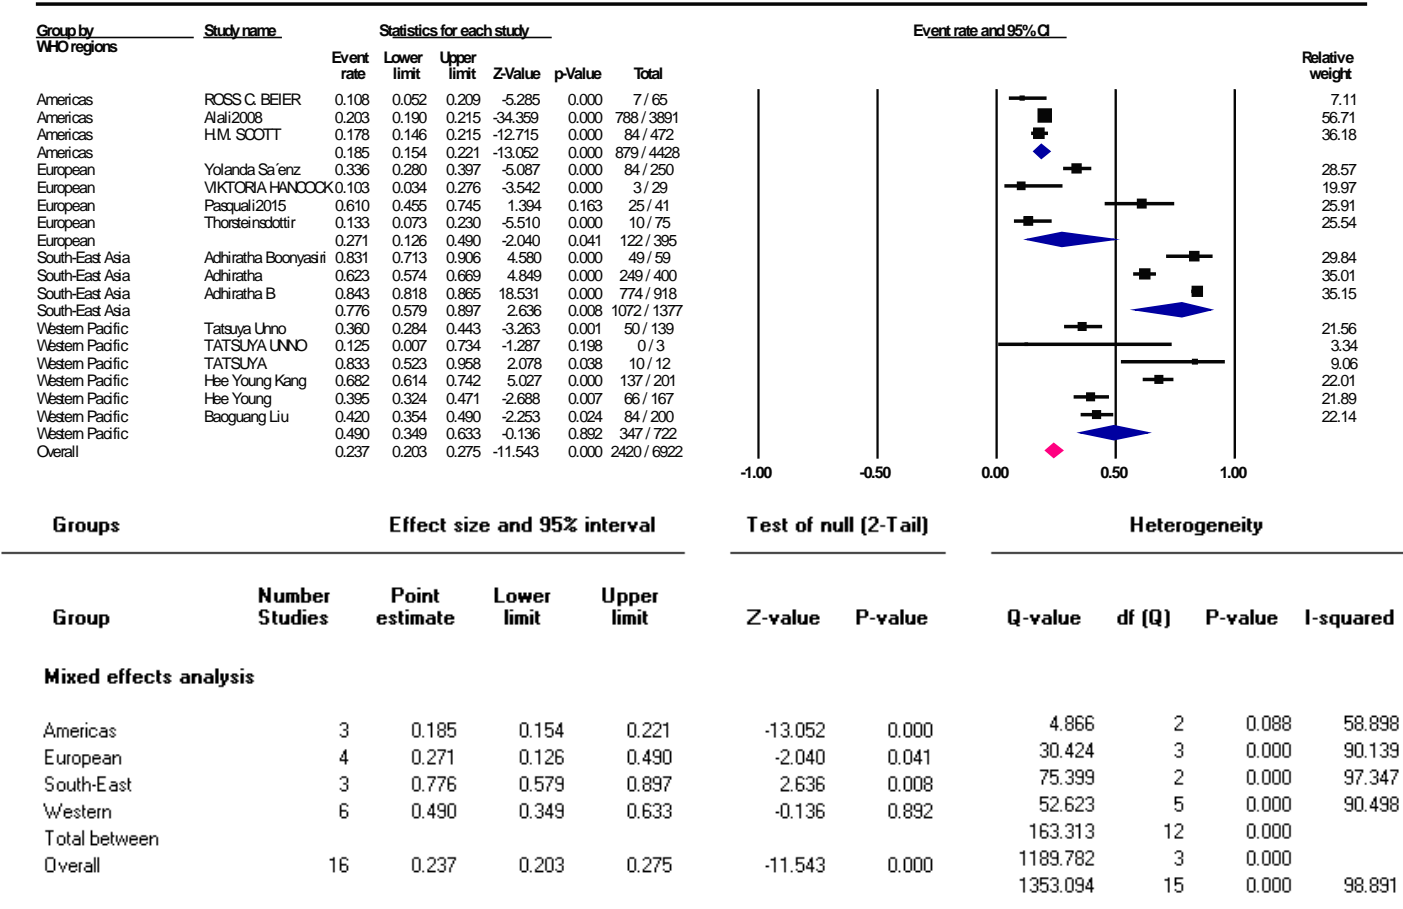

Fig S90 . Global prevalence of Tetracycline resistance E. coli clinical (human) isolates in WHO regional offices with MIC method.
